# Supplementary material for: DNL343 is an investigational CNS penetrant eIF2B activator that prevents and reverses the effects of neurodegeneration caused by the Integrated Stress Response
Source: bioRxiv preprint, doi:10.1101/2023.08.21.554203, version 3 (2024-04-30)
Supplement: Supplemental Table 4 [file 554203_file05.xlsx]

## Sheet: Sheet1
Supplemental Table 4 - Relating to Supplemental Figure 1B
gene_id	symbol	logFC	lower 95% CI	upper 95% CI	AveExpr	t	P.Value	adj.P.Value	B
ENSMUSG00000038539	Atf5	3.08547	2.86497	3.30597	5.64877	28.1983	7.02804e-30	6.9416e-26	57.015		gene_id	Ensembl gene identifier
ENSMUSG00000030717	Nupr1	2.79542	2.53002	3.06082	4.48379	21.2251	8.4252e-25	2.9611e-21	45.6387		symbol	Gene symbol
ENSMUSG00000031490	Eif4ebp1	2.98336	2.69965	3.26706	3.96641	21.1908	8.99393e-25	2.9611e-21	45.1773		logFC	estimate of the log2-fold-change between mutant and wildtype samples
ENSMUSG00000024640	Psat1	1.17594	1.0391	1.31278	8.06133	17.3176	2.61078e-21	6.44666e-18	38.4085		lower 95% CI	left limit of confidence interval for logFC
ENSMUSG00000027737	Slc7a11	1.81971	1.61663	2.02279	6.90995	18.1023	5.01853e-21	8.26134e-18	37.796		upper 95% CI	right limit of confidence interval for logFC
ENSMUSG00000005667	Mthfd2	2.4256	2.14124	2.70996	3.96106	17.1893	3.47827e-21	6.87098e-18	37.4611		AveExpr	average log2-expression for the probe over all samples
ENSMUSG00000010095	Slc3a2	1.59519	1.40211	1.78828	6.93749	16.6616	2.27258e-20	3.20661e-17	36.274		t	moderated t-statistic
ENSMUSG00000026615	Eprs	1.36979	1.19866	1.54092	6.878	16.1297	3.95939e-20	4.88836e-17	35.7063		P.Value	raw p-value
ENSMUSG00000023067	Cdkn1a	1.88856	1.65071	2.12641	5.34251	16.0007	5.36638e-20	5.8893e-17	35.3168		adj.P.Value	adjusted p-value (FDR)
ENSMUSG00000020000	Moxd1	3.67863	3.17996	4.17729	2.54618	14.9161	8.349e-18	8.2463e-15	29.2942		B	log-odds that the gene is differentially expressed
ENSMUSG00000020256	Aldh1l2	2.99876	2.5479	3.44963	2.64355	13.403	3.61662e-17	3.24739e-14	28.0202
ENSMUSG00000031297	Slc7a3	2.74247	2.31275	3.17219	2.99961	12.8607	1.55738e-16	1.18325e-13	26.9264
ENSMUSG00000052276	Ostn	3.76661	3.19295	4.34027	0.888724	13.2314	5.72411e-17	4.71142e-14	26.8721
ENSMUSG00000060519	Tor3a	1.9194	1.60957	2.22924	3.4889	12.4837	4.39143e-16	2.89161e-13	26.1937
ENSMUSG00000032715	Trib3	4.11548	3.51832	4.71264	1.47345	13.9653	2.64573e-16	1.86656e-13	25.6274
ENSMUSG00000025408	Ddit3	1.31763	1.09832	1.53694	5.66399	12.1071	1.25924e-15	7.31616e-13	25.4433
ENSMUSG00000001918	Slc1a5	2.97845	2.48381	3.47309	2.17618	12.1341	1.16694e-15	7.20364e-13	24.3524
ENSMUSG00000040618	Pck2	1.89121	1.53518	2.24724	3.92932	10.726	1.6947e-13	8.36927e-11	20.6102
ENSMUSG00000000184	Ccnd2	0.702058	0.566633	0.837483	8.71954	10.4468	1.62883e-13	8.36927e-11	20.4244
ENSMUSG00000025140	Pycr1	2.86476	2.32573	3.40379	1.573	10.7098	7.36215e-14	4.03977e-11	20.1631
ENSMUSG00000024359	Hspa9	1.01377	0.815141	1.21239	7.07505	10.3113	6.79564e-13	3.19622e-10	19.1531
ENSMUSG00000001627	Ifrd1	1.0219	0.813791	1.23001	5.68818	9.89517	8.86154e-13	3.97843e-10	18.9423
ENSMUSG00000007476	Lrrc8a	0.986642	0.779391	1.19389	5.64044	9.59337	2.27508e-12	9.76997e-10	18.0109
ENSMUSG00000041390	Mdfic	1.78134	1.40406	2.15863	3.4381	9.51452	2.91593e-12	1.20003e-09	17.7707
ENSMUSG00000074656	Eif2s2	0.712675	0.558837	0.866513	8.42061	9.33546	5.13741e-12	2.02969e-09	16.9824
ENSMUSG00000029446	Psph	0.997157	0.778253	1.21606	5.34292	9.17946	8.44087e-12	3.20656e-09	16.7264
ENSMUSG00000003623	Crot	0.904821	0.704027	1.10561	5.8763	9.08074	1.15741e-11	4.23397e-09	16.372
ENSMUSG00000035686	Thrsp	-1.01886	-1.2588	-0.778921	4.90461	-8.55704	6.29034e-11	2.1424e-08	14.7874
ENSMUSG00000028542	Slc6a9	1.30166	0.995871	1.60746	4.6693	8.58175	6.61284e-11	2.17717e-08	14.7701
ENSMUSG00000040010	Slc7a5	2.52406	2.07103	2.97709	4.75107	11.5776	1.20106e-10	3.70715e-08	14.577
ENSMUSG00000028893	Sesn2	2.62898	2.01731	3.24066	1.82774	8.66114	4.48234e-11	1.58114e-08	14.557
ENSMUSG00000038776	Ephx1	1.49268	1.13675	1.8486	3.7672	8.45116	8.8892e-11	2.83222e-08	14.4907
ENSMUSG00000027122	Arl14ep	1.02232	0.774226	1.27041	5.03619	8.30388	1.44075e-10	4.31222e-08	13.9515
ENSMUSG00000026142	Rhbdd1	1.80084	1.34477	2.25691	2.63345	7.95706	4.52877e-10	1.31561e-07	12.8096
ENSMUSG00000025239	Limd1	1.06167	0.789634	1.33371	4.63744	7.86447	6.15964e-10	1.73825e-07	12.5641
ENSMUSG00000030499	Kctd15	1.07536	0.799349	1.35137	4.54528	7.8512	6.43775e-10	1.76627e-07	12.5275
ENSMUSG00000036181	Hist1h1c	0.891496	0.661084	1.12191	5.55181	7.79689	7.71335e-10	2.00486e-07	12.232
ENSMUSG00000027313	Chac1	2.31768	1.71943	2.91592	2.0944	7.807	7.45803e-10	1.99089e-07	12.1501
ENSMUSG00000041313	Slc7a1	0.898303	0.663885	1.13272	4.91262	7.72217	9.89573e-10	2.4435e-07	12.0746
ENSMUSG00000024924	Vldlr	0.746942	0.552581	0.941303	6.28758	7.74436	9.18956e-10	2.32732e-07	11.9744
ENSMUSG00000043496	Tril	0.951856	0.703335	1.20038	5.38987	7.71921	1.0302e-09	2.48178e-07	11.9702
ENSMUSG00000036390	Gadd45a	1.94925	1.43677	2.46172	2.13236	7.66478	1.19859e-09	2.81369e-07	11.7721
ENSMUSG00000029178	Klf3	0.709597	0.522878	0.896316	6.1943	7.65827	1.22496e-09	2.81369e-07	11.6999
ENSMUSG00000026456	Cyb5r1	2.23223	1.74956	2.71491	4.55913	9.58296	2.26428e-09	4.8618e-07	11.6649
ENSMUSG00000030004	Nat8	1.31512	0.963599	1.66663	3.37203	7.5392	1.82459e-09	4.09579e-07	11.557
ENSMUSG00000056216	Cebpg	0.894776	0.653735	1.13582	5.39072	7.4805	2.22138e-09	4.8618e-07	11.2038
ENSMUSG00000021474	Sfxn1	0.501665	0.365261	0.638068	8.01494	7.4113	2.8023e-09	5.88901e-07	10.702
ENSMUSG00000039989	Cbx4	0.83496	0.60408	1.06584	5.46947	7.28764	4.24739e-09	8.56153e-07	10.5645
ENSMUSG00000063297	Luzp2	0.547334	0.396838	0.697831	8.44159	7.32882	3.69771e-09	7.60881e-07	10.3924
ENSMUSG00000042613	Pbxip1	0.577086	0.417224	0.736947	6.72915	7.27452	4.43921e-09	8.76922e-07	10.3605
ENSMUSG00000024486	Hbegf	0.790307	0.570215	1.0104	5.79916	7.23602	5.05386e-09	9.78764e-07	10.3408
ENSMUSG00000059325	Hopx	-1.27296	-1.60099	-0.944923	5.22039	-7.92228	7.19965e-09	1.34172e-06	10.2713
ENSMUSG00000026674	Ddr2	1.30204	0.962459	1.64161	5.11931	7.82422	8.62239e-09	1.54842e-06	10.1054
ENSMUSG00000030785	Cox6a2	1.06692	0.761852	1.372	4.41605	7.04756	9.54593e-09	1.68366e-06	9.90612
ENSMUSG00000040430	Pitpnc1	0.556859	0.399835	0.713882	7.15855	7.14643	6.83641e-09	1.29852e-06	9.88494
ENSMUSG00000053931	Cnn3	0.631058	0.451467	0.81065	6.49332	7.08094	8.52787e-09	1.54842e-06	9.72961
ENSMUSG00000020142	Slc1a4	0.924063	0.657904	1.19022	4.68783	6.99629	1.13519e-08	1.96707e-06	9.7003
ENSMUSG00000022122	Ednrb	0.700765	0.497671	0.903859	6.12602	6.95317	1.31345e-08	2.23671e-06	9.35586
ENSMUSG00000039450	Dcxr	1.08284	0.763821	1.40187	3.80458	6.83991	1.92713e-08	3.07005e-06	9.27043
ENSMUSG00000027230	Creb3l1	1.84245	1.30034	2.38457	2.03002	6.84877	1.87017e-08	3.02813e-06	9.19305
ENSMUSG00000020591	Ntsr2	-0.579259	-0.747898	-0.41062	6.62362	-6.92186	1.46024e-08	2.44453e-06	9.18484
ENSMUSG00000039037	St6galnac5	-0.623921	-0.806613	-0.441229	6.17715	-6.88206	1.67083e-08	2.75047e-06	9.11242
ENSMUSG00000038508	Gdf15	3.85381	2.85393	4.85369	0.382887	7.93063	2.41229e-08	3.78194e-06	8.75667
ENSMUSG00000024587	Nars	0.539372	0.378146	0.700599	7.23916	6.74155	2.68953e-08	4.1507e-06	8.50962
ENSMUSG00000031960	Aars	0.716088	0.499154	0.933021	5.53764	6.65191	3.64486e-08	5.5385e-06	8.42722
ENSMUSG00000022309	Angpt1	1.01032	0.700049	1.32059	3.88231	6.56188	4.94711e-08	7.08154e-06	8.34714
ENSMUSG00000004032	Gstm5	-0.833133	-1.06403	-0.602241	7.76264	-7.39062	4.70447e-08	6.83325e-06	8.17179
ENSMUSG00000048078	Tenm4	0.695486	0.483611	0.907362	6.30442	6.61676	4.30468e-08	6.34587e-06	8.16069
ENSMUSG00000002332	Dhrs1	0.998059	0.722994	1.27312	6.7874	7.4642	7.0021e-08	9.84393e-06	7.92593
ENSMUSG00000049775	Tmsb4x	-0.480112	-0.625156	-0.335067	10.3885	-6.67737	3.95657e-08	5.92106e-06	7.91906
ENSMUSG00000041168	Lonp1	0.691279	0.474589	0.907969	5.16173	6.42869	7.77506e-08	1.06659e-05	7.72631
ENSMUSG00000068739	Sars	0.607835	0.41812	0.79755	6.4124	6.45643	7.07622e-08	9.84393e-06	7.65195
ENSMUSG00000029752	Asns	0.809797	0.552588	1.06701	5.08398	6.34451	1.03471e-07	1.38485e-05	7.45966
ENSMUSG00000058135	Gstm1	-0.48803	-0.643058	-0.333001	8.41621	-6.3437	1.03755e-07	1.38485e-05	7.07494
ENSMUSG00000020044	Timp3	0.433432	0.293665	0.573198	8.61532	6.24922	1.42993e-07	1.88312e-05	6.74305
ENSMUSG00000060512	RP23-192C21.1	1.21411	0.80934	1.61888	2.83884	6.04447	2.86434e-07	3.53639e-05	6.71323
ENSMUSG00000037999	Arap2	0.462366	0.312366	0.612367	7.99957	6.21157	1.62483e-07	2.11164e-05	6.65956
ENSMUSG00000042406	Atf4	1.47987	1.0779	1.88184	6.38988	7.71811	3.3317e-07	3.87143e-05	6.65563
ENSMUSG00000031610	Scrg1	-0.797086	-1.06094	-0.533237	5.14329	-6.08834	2.49925e-07	3.16475e-05	6.58499
ENSMUSG00000026227	AC102506.1	0.882072	0.587015	1.17713	4.4484	6.0243	3.06708e-07	3.64983e-05	6.49496
ENSMUSG00000037071	Scd1	-0.582675	-0.773214	-0.392135	7.30871	-6.17105	2.23993e-07	2.87322e-05	6.42506
ENSMUSG00000025403	Shmt2	1.16271	0.769091	1.55633	3.59699	5.95254	3.91156e-07	4.44074e-05	6.38029
ENSMUSG00000024513	Mbd2	0.649175	0.431783	0.866567	5.8211	6.01763	3.13715e-07	3.68877e-05	6.24302
ENSMUSG00000030738	Eif3c	0.562284	0.375793	0.748776	7.19054	6.07857	2.70245e-07	3.37875e-05	6.23471
ENSMUSG00000053398	Phgdh	0.868241	0.576089	1.16039	4.71309	5.99524	3.85772e-07	4.43054e-05	6.22171
ENSMUSG00000042608	Stk40	0.766313	0.506301	1.02632	5.02652	5.93911	4.09354e-07	4.49243e-05	6.11674
ENSMUSG00000006611	Hfe	1.68852	1.10739	2.26964	2.15761	5.85521	5.43849e-07	5.71446e-05	6.07388
ENSMUSG00000064373	Sepp1	-0.463003	-0.617612	-0.308393	8.08947	-6.03469	2.9609e-07	3.61047e-05	6.05942
ENSMUSG00000025969	Nrp2	0.888186	0.585513	1.19086	4.69381	5.91693	4.73418e-07	5.13841e-05	6.04647
ENSMUSG00000020671	Rab10	0.400485	0.266635	0.534335	8.26621	6.0294	3.01443e-07	3.63091e-05	6.02534
ENSMUSG00000027712	Anxa5	0.582083	0.384705	0.779461	6.30107	5.94284	4.04217e-07	4.49195e-05	5.92777
ENSMUSG00000020680	Taf15	0.812573	0.533553	1.09159	4.80185	5.86861	5.19733e-07	5.57978e-05	5.91917
ENSMUSG00000032714	Syde1	1.20434	0.785357	1.62332	2.97789	5.79246	6.72451e-07	6.57603e-05	5.90039
ENSMUSG00000024493	Lars	0.826863	0.548845	1.10488	5.31673	6.02154	5.39039e-07	5.71446e-05	5.85007
ENSMUSG00000021010	Npas3	0.647263	0.423678	0.870847	5.59553	5.83373	5.84844e-07	6.01719e-05	5.67563
ENSMUSG00000004040	Stat3	0.704211	0.463185	0.945237	5.83909	5.8998	5.92387e-07	6.03196e-05	5.65331
ENSMUSG00000079037	Prnp	0.430123	0.284264	0.575983	9.4746	5.94244	4.04762e-07	4.49195e-05	5.6458
ENSMUSG00000005089	Slc1a2	-0.711599	-0.921624	-0.501574	12.1995	-7.04424	5.80002e-07	6.01719e-05	5.5658
ENSMUSG00000027111	Itga6	0.743451	0.483573	1.00333	5.07331	5.76488	7.38164e-07	7.07849e-05	5.52953
ENSMUSG00000021957	Tkt	0.611594	0.398422	0.824766	5.61997	5.7815	6.97833e-07	6.75735e-05	5.51582
ENSMUSG00000009291	Pttg1ip	0.486666	0.3183	0.655032	6.56082	5.82484	6.02693e-07	6.07429e-05	5.51012
ENSMUSG00000018677	Slc25a39	0.478106	0.31238	0.643831	6.76424	5.81355	6.26156e-07	6.21327e-05	5.44335
ENSMUSG00000030545	Pex11a	0.551047	0.35768	0.744415	5.81164	5.74267	7.95683e-07	7.48473e-05	5.33204
ENSMUSG00000039533	Mmd2	0.401241	0.260824	0.541657	7.86337	5.75831	7.54733e-07	7.16779e-05	5.14859
ENSMUSG00000037852	Cpe	-0.313525	-0.422228	-0.204823	11.2268	-5.81218	6.29065e-07	6.21327e-05	5.10163
ENSMUSG00000033763	Mtss1l	0.529943	0.345057	0.71483	7.69834	5.78809	8.57062e-07	7.98604e-05	5.06544
ENSMUSG00000009614	Sardh	0.987088	0.62871	1.34547	3.78702	5.55037	1.522e-06	0.000133033	5.02971
ENSMUSG00000047786	Lix1	-0.537858	-0.72977	-0.345947	6.02332	-5.64773	1.09631e-06	0.000100284	4.98847
ENSMUSG00000028174	Rpe65	-1.4225	-1.94391	-0.901088	2.50517	-5.49769	1.81708e-06	0.000153396	4.96917
ENSMUSG00000009633	G0s2	1.33349	0.843622	1.82335	2.60139	5.48554	1.89286e-06	0.000158438	4.92953
ENSMUSG00000017493	Igfbp4	0.611445	0.393467	0.829423	6.23188	5.66024	1.20816e-06	0.000108482	4.87343
ENSMUSG00000036112	Metap2	0.410564	0.26407	0.557058	7.5745	5.64767	1.09655e-06	0.000100284	4.80548
ENSMUSG00000024039	Cbs	0.703762	0.446887	0.960636	4.86383	5.52092	1.68052e-06	0.000145601	4.76523
ENSMUSG00000020611	Gna13	0.404125	0.25932	0.548929	7.57219	5.62395	1.18786e-06	0.000107638	4.72507
ENSMUSG00000074971	Fibin	1.90319	1.22045	2.58593	2.2011	5.6718	2.55511e-06	0.000208569	4.72012
ENSMUSG00000030341	Tnfrsf1a	0.888736	0.558685	1.21879	3.62867	5.42623	2.31004e-06	0.000190135	4.66595
ENSMUSG00000042747	Krtcap2	0.630765	0.399586	0.861944	5.70621	5.49828	1.81349e-06	0.000153396	4.54954
ENSMUSG00000027562	Car2	-0.454115	-0.61829	-0.289941	7.81434	-5.57401	1.40556e-06	0.00012507	4.53857
ENSMUSG00000016194	Hsd11b1	-1.29644	-1.78247	-0.810402	3.00126	-5.38274	3.03591e-06	0.000239546	4.47169
ENSMUSG00000049422	Chchd10	0.418918	0.265707	0.572129	7.98288	5.50994	1.74379e-06	0.000149769	4.31089
ENSMUSG00000041607	Mbp	-0.394395	-0.535315	-0.253474	11.7625	-5.65867	1.48447e-06	0.000130911	4.26627
ENSMUSG00000043969	Emx2	-0.575219	-0.791103	-0.359335	5.59255	-5.36934	2.79556e-06	0.000224954	4.13198
ENSMUSG00000035530	Eif1	0.407115	0.256543	0.557687	8.07651	5.44854	2.14339e-06	0.000177901	4.09629
ENSMUSG00000039239	Tgfb2	0.575105	0.35784	0.79237	5.40045	5.33414	3.14532e-06	0.000240824	4.05696
ENSMUSG00000020108	Ddit4	0.635611	0.393281	0.87794	4.84602	5.28557	3.7002e-06	0.00027687	3.99362
ENSMUSG00000038615	Nfe2l1	0.620895	0.394858	0.846932	6.92238	5.58593	3.14256e-06	0.000240824	3.93549
ENSMUSG00000031827	Cotl1	0.444629	0.276967	0.612292	6.45652	5.34404	3.04285e-06	0.000239546	3.92647
ENSMUSG00000033998	Kcnk1	0.480949	0.299467	0.66243	6.51057	5.3404	3.08011e-06	0.000239546	3.91378
ENSMUSG00000026932	Nacc2	0.353073	0.220547	0.485599	8.04269	5.36872	2.80139e-06	0.000224954	3.83936
ENSMUSG00000029778	Adcyap1r1	0.474905	0.295372	0.654439	6.87977	5.33053	3.18363e-06	0.000241882	3.82925
ENSMUSG00000022043	Trim35	0.45532	0.282327	0.628313	6.617	5.30392	3.48005e-06	0.000262385	3.76633
ENSMUSG00000026234	Ncl	0.40267	0.250789	0.55455	8.2367	5.34262	3.05734e-06	0.000239546	3.73507
ENSMUSG00000021266	Wars	0.83171	0.503548	1.15987	3.98333	5.1073	6.70225e-06	0.000472844	3.56978
ENSMUSG00000028811	Yars	0.848546	0.513036	1.18406	4.01179	5.09656	6.94553e-06	0.000479727	3.54391
ENSMUSG00000020122	Egfr	1.04652	0.629768	1.46327	3.34679	5.06031	7.83342e-06	0.000529936	3.54133
ENSMUSG00000030339	Ltbr	1.07523	0.64725	1.50321	3.44238	5.06275	7.77025e-06	0.000529288	3.53406
ENSMUSG00000029777	Gars	0.718895	0.443858	0.993933	5.59974	5.29571	5.60871e-06	0.000401429	3.5332
ENSMUSG00000024143	Rhoq	0.418581	0.257439	0.579724	6.70019	5.23452	4.38803e-06	0.000323437	3.52512
ENSMUSG00000031652	N4bp1	0.434839	0.267563	0.602116	6.88576	5.23844	4.33091e-06	0.000321627	3.51289
ENSMUSG00000032060	Cryab	-0.531209	-0.736651	-0.325766	6.44477	-5.2129	4.89836e-06	0.000355743	3.45514
ENSMUSG00000046573	Lyrm4	0.505489	0.31142	0.699557	7.21994	5.25729	4.65967e-06	0.000340915	3.4387
ENSMUSG00000002778	Kdelr1	0.436856	0.266775	0.606937	6.099	5.17595	5.33406e-06	0.000384558	3.42338
ENSMUSG00000024810	Il33	-0.552421	-0.770647	-0.334195	6.05026	-5.10149	6.86519e-06	0.000479727	3.18338
ENSMUSG00000025812	Pard3	0.482672	0.290355	0.67499	5.79701	5.05756	7.9051e-06	0.000531147	3.0829
ENSMUSG00000004056	Akt2	0.494368	0.297682	0.691054	6.17579	5.06507	7.71074e-06	0.000528882	3.054
ENSMUSG00000033208	S100b	-0.346169	-0.482337	-0.210001	9.28171	-5.12295	6.36268e-06	0.000452116	2.93853
ENSMUSG00000007682	Dio2	0.360968	0.21825	0.503685	9.05179	5.09681	6.93976e-06	0.000479727	2.86864
ENSMUSG00000054226	Tprkb	-0.438798	-0.614541	-0.263054	6.88626	-5.03145	8.61954e-06	0.000575238	2.84396
ENSMUSG00000058254	Tspan7	-0.565326	-0.779192	-0.351461	8.80599	-5.41983	9.4039e-06	0.000623371	2.78013
ENSMUSG00000027253	Lrp4	-1.18712	-1.68651	-0.687726	2.78267	-4.79055	1.91352e-05	0.00120381	2.7362
ENSMUSG00000041132	N4bp2l1	0.587246	0.34488	0.829612	4.87318	4.88266	1.40866e-05	0.000927554	2.67448
ENSMUSG00000070366	Ppapdc1a	1.33991	0.772024	1.90779	2.23036	4.75471	2.14317e-05	0.00132012	2.67197
ENSMUSG00000031283	Chrdl1	0.62898	0.368598	0.889362	5.12685	4.86781	1.47917e-05	0.00096606	2.58762
ENSMUSG00000036885	Arhgef26	0.559098	0.327205	0.790991	5.47535	4.85857	1.52478e-05	0.000984332	2.48454
ENSMUSG00000025007	Aldh18a1	1.46759	0.843256	2.09192	2.07307	4.75704	2.77094e-05	0.0016005	2.45337
ENSMUSG00000022505	Emp2	0.417874	0.24483	0.590919	6.28974	4.86626	1.4867e-05	0.00096606	2.39304
ENSMUSG00000031700	Gpt2	0.478714	0.279879	0.677549	5.95404	4.85167	1.5597e-05	0.00100034	2.38766
ENSMUSG00000015484	Fam163a	-1.11324	-1.59368	-0.632808	2.79465	-4.66943	2.83042e-05	0.00162535	2.37101
ENSMUSG00000010755	Cars	0.797886	0.455743	1.14003	3.68984	4.69939	2.56731e-05	0.00149873	2.33739
ENSMUSG00000020422	Tns3	-0.407821	-0.577413	-0.238228	6.85705	-4.84586	1.58976e-05	0.00101304	2.24732
ENSMUSG00000033159	Cnppd1	0.599878	0.342563	0.857192	4.44519	4.69792	2.57958e-05	0.00149873	2.19647
ENSMUSG00000059588	Calcrl	1.46293	0.824816	2.10105	2.22982	4.6295	3.64118e-05	0.00202044	2.19581
ENSMUSG00000013089	Etv5	0.543524	0.313307	0.773741	5.42554	4.75762	2.12288e-05	0.00131872	2.19548
ENSMUSG00000021846	Peli2	0.507094	0.293243	0.720946	5.76622	4.77842	1.98321e-05	0.00123976	2.18593
ENSMUSG00000070509	Rgma	0.632591	0.363472	0.90171	5.26308	4.74047	2.35824e-05	0.00141166	2.14185
ENSMUSG00000093930	Hmgcs1	-0.376762	-0.533637	-0.219887	8.1307	-4.83974	1.62205e-05	0.00102699	2.10732
ENSMUSG00000078517	Emc1	0.475557	0.273421	0.677692	5.98579	4.74097	2.24153e-05	0.00135826	2.05666
ENSMUSG00000034667	Xpot	0.530733	0.303958	0.757508	5.36658	4.71616	2.43068e-05	0.00144264	2.05136
ENSMUSG00000029763	Exoc4	0.452571	0.259732	0.645409	5.91668	4.72934	2.32834e-05	0.00140226	2.01873
ENSMUSG00000060548	Tnfrsf19	0.530883	0.309887	0.751879	6.75249	4.87198	2.22119e-05	0.00135424	1.99152
ENSMUSG00000026003	Acadl	0.442213	0.252557	0.63187	5.95779	4.69863	2.57362e-05	0.00149873	1.90678
ENSMUSG00000018217	Pmp22	0.493756	0.279301	0.708211	5.25137	4.63963	3.11829e-05	0.00175996	1.84441
ENSMUSG00000032562	Gnai2	0.325846	0.187709	0.463983	8.52311	4.75347	2.15186e-05	0.00132012	1.79633
ENSMUSG00000032387	Rbpms2	1.00537	0.553324	1.45741	2.87091	4.48179	5.19423e-05	0.0027435	1.79326
ENSMUSG00000099083	Atf7	0.738586	0.41058	1.06659	4.1903	4.53761	4.33913e-05	0.00236782	1.7564
ENSMUSG00000021094	Dhrs7	0.563333	0.315869	0.810796	4.99738	4.58735	3.69456e-05	0.00203862	1.72476
ENSMUSG00000051727	Kctd14	-0.639712	-0.923604	-0.355819	4.29906	-4.54085	4.29392e-05	0.00235617	1.71437
ENSMUSG00000041801	Phlda3	0.891254	0.489877	1.29263	3.4933	4.47463	5.31524e-05	0.00279248	1.68196
ENSMUSG00000032470	Mras	0.34015	0.194775	0.485524	8.52986	4.71508	2.43922e-05	0.00144264	1.67325
ENSMUSG00000028124	Gclm	0.422031	0.238823	0.605239	6.3242	4.64202	3.09418e-05	0.00175639	1.66375
ENSMUSG00000055322	Tns1	0.483399	0.272332	0.694467	5.86677	4.61522	3.37543e-05	0.00189427	1.66253
ENSMUSG00000028179	Cth	0.793942	0.43409	1.15379	3.41941	4.44603	5.8267e-05	0.00302897	1.60263
ENSMUSG00000020922	Lsm12	0.599541	0.330811	0.868271	4.55574	4.49583	4.96471e-05	0.00266502	1.54018
ENSMUSG00000021750	Fam107a	-0.34826	-0.499369	-0.19715	8.31588	-4.64429	3.07146e-05	0.00175358	1.46273
_x001B_É‰|ENSMUSG00000095687	Rnaset2a	0.639593	0.349444	0.929741	4.35123	4.44213	5.89997e-05	0.003051	1.40329
ENSMUSG00000040021	Lats1	0.596699	0.326533	0.866865	4.49958	4.45074	5.73929e-05	0.00299931	1.39915
ENSMUSG00000022037	Clu	-0.327219	-0.470277	-0.18416	9.27181	-4.60927	3.44121e-05	0.00192027	1.28248
ENSMUSG00000070532	Ccdc190	1.02525	0.544352	1.50615	2.86147	4.2962	9.39966e-05	0.00446771	1.24085
ENSMUSG00000031760	Mt3	-0.53946	-0.773286	-0.305635	7.0384	-4.7037	4.92144e-05	0.00265623	1.22897
ENSMUSG00000022564	Grina	0.447794	0.246857	0.648732	6.19998	4.49081	5.04562e-05	0.00267934	1.2192
ENSMUSG00000039693	Msantd3	0.621517	0.333545	0.909489	4.1423	4.34921	7.94116e-05	0.00392174	1.16548
ENSMUSG00000026374	Tsn	0.31281	0.173677	0.451943	7.80129	4.53062	4.4382e-05	0.00240858	1.14939
ENSMUSG00000059921	Unc5c	0.547027	0.295659	0.798394	4.87014	4.38538	7.07558e-05	0.00360234	1.13155
ENSMUSG00000061517	Sox21	0.513119	0.277202	0.749035	5.27119	4.38296	7.13053e-05	0.0036117	1.03626
ENSMUSG00000040945	Rcc2	0.533189	0.290833	0.775545	5.79724	4.44336	6.60512e-05	0.00338025	1.03071
ENSMUSG00000021453	Gadd45g	0.799163	0.41979	1.17854	3.34613	4.24499	0.000110555	0.00515071	1.02375
ENSMUSG00000000278	Scpep1	0.738584	0.390815	1.08635	3.93005	4.27973	9.90394e-05	0.00468044	1.01987
ENSMUSG00000025352	Gdf11	-0.65093	-0.955282	-0.346577	4.30219	-4.30988	9.00023e-05	0.0043153	1.01685
ENSMUSG00000050505	Pcdh20	-0.738199	-1.08795	-0.388451	3.54042	-4.2533	0.000107688	0.0050409	0.982319
ENSMUSG00000038388	Mpp6	0.363469	0.197653	0.529284	6.97186	4.41723	6.39019e-05	0.00328729	0.875335
ENSMUSG00000040842	Szrd1	0.424836	0.226998	0.622673	5.42014	4.32733	8.5143e-05	0.00412234	0.841967
ENSMUSG00000028494	Plin2	0.890869	0.459895	1.32184	2.82247	4.16553	0.00014202	0.00646418	0.830175
ENSMUSG00000031342	Gpm6b	-0.310305	-0.449462	-0.171148	10.5405	-4.49383	5.01322e-05	0.00267652	0.827844
ENSMUSG00000030317	Timp4	0.368251	0.198314	0.538187	6.25583	4.36682	7.50769e-05	0.00378334	0.821897
ENSMUSG00000032537	Ephb1	0.37537	0.201866	0.548874	6.35907	4.35971	7.67993e-05	0.00383104	0.779065
ENSMUSG00000038894	Irs2	0.410741	0.219737	0.601744	6.07047	4.33344	8.35028e-05	0.00406284	0.745663
ENSMUSG00000026773	Pfkfb3	0.583292	0.304094	0.86249	4.27588	4.20999	0.000123474	0.00567236	0.71232
ENSMUSG00000025364	Pa2g4	0.387074	0.206395	0.567753	6.03919	4.31713	8.79509e-05	0.00423752	0.711985
ENSMUSG00000024846	Cst6	-0.995068	-1.48682	-0.503319	2.14777	-4.07772	0.000186947	0.00813424	0.670418
ENSMUSG00000044734	Serpinb1a	-0.789269	-1.17559	-0.402953	3.16302	-4.11708	0.000165317	0.00732212	0.667106
ENSMUSG00000027999	Pla2g12a	0.663625	0.340331	0.986919	3.48586	4.1365	0.000155565	0.00699293	0.648728
ENSMUSG00000058013	2023-09-11	0.351395	0.188177	0.514612	7.06649	4.33847	8.2178e-05	0.00401818	0.617133
ENSMUSG00000001924	Uba1	0.360262	0.193538	0.526987	7.73907	4.35438	7.8114e-05	0.00387704	0.609137
ENSMUSG00000010064	Slc38a3	0.642859	0.332503	0.953215	4.3236	4.1741	0.000138245	0.00632151	0.585777
ENSMUSG00000018425	Dhx40	0.493576	0.258158	0.728993	5.25482	4.22496	0.000117778	0.00546148	0.574859
ENSMUSG00000026424	Gpr37l1	0.351074	0.188112	0.514037	7.88402	4.3413	8.14405e-05	0.00400193	0.548148
ENSMUSG00000036751	Cox6b1	-0.319823	-0.467546	-0.172099	9.0303	-4.36282	7.60411e-05	0.00381248	0.525779
ENSMUSG00000041329	Atp1b2	0.368489	0.195636	0.541342	7.03444	4.29591	9.40857e-05	0.00446771	0.495271
ENSMUSG00000078234	Klhdc7a	-0.954083	-1.43155	-0.476619	2.94581	-4.02674	0.000219074	0.00916862	0.434316
ENSMUSG00000029826	Zc3hav1	0.908319	0.453164	1.36347	2.96375	4.02149	0.000222671	0.00927983	0.408803
ENSMUSG00000016534	Lamp2	0.47829	0.250426	0.706154	6.10182	4.23708	0.000122504	0.00565408	0.384194
ENSMUSG00000001665	Gstt3	-0.816846	-1.22923	-0.404459	3.01437	-3.99156	0.000244307	0.00980903	0.319845
ENSMUSG00000021364	Elovl2	0.806507	0.400248	1.21277	3.47411	4.00048	0.00023765	0.0095807	0.264672
ENSMUSG00000039221	Rpl22l1	-0.3272	-0.482073	-0.172326	8.38482	-4.25739	0.000106305	0.00499986	0.248845
ENSMUSG00000020250	Txnrd1	0.463861	0.237216	0.690506	5.4131	4.12429	0.000161628	0.00719097	0.232951
ENSMUSG00000036854	Hspb6	0.671364	0.333606	1.00912	3.74989	4.00553	0.000233963	0.00954897	0.219563
ENSMUSG00000025791	Pgm2	0.364586	0.186956	0.542216	6.00909	4.1361	0.00015576	0.00699293	0.158135
ENSMUSG00000055320	Tead1	0.532854	0.26725	0.798457	4.7323	4.04279	0.000208417	0.00887301	0.116308
ENSMUSG00000044147	Arf6	0.483881	0.241914	0.725847	4.59059	4.02986	0.000216959	0.00911873	0.110747
ENSMUSG00000020107	Anapc16	0.3829	0.194985	0.570814	5.74418	4.10613	0.00017108	0.00754354	0.101599
ENSMUSG00000024812	Tjp2	0.475359	0.241965	0.708753	5.92069	4.10942	0.000178297	0.00779221	0.051557
ENSMUSG00000060743	H3f3a	-0.665437	-1.00002	-0.330854	4.36412	-4.01686	0.000246264	0.00984757	0.0329409
ENSMUSG00000020598	Nrcam	0.32519	0.167749	0.48263	7.58322	4.16224	0.000143497	0.00650148	0.0288113
ENSMUSG00000022781	Pak2	0.36364	0.18479	0.542491	6.15021	4.09722	0.000175907	0.00772193	0.0189857
ENSMUSG00000037196	Pacrg	-0.604196	-0.913241	-0.295151	3.89022	-3.9397	0.000286704	0.011282	-0.00672914
ENSMUSG00000071655	Ubxn1	0.338981	0.173697	0.504266	7.07045	4.13287	0.000157344	0.00703207	-0.00718718
ENSMUSG00000003865	Gys1	0.827589	0.396394	1.25878	2.94411	3.86766	0.000357607	0.0133286	-0.0116613
ENSMUSG00000037221	Mospd3	0.758954	0.360833	1.15708	2.99036	3.84157	0.000387257	0.0141664	-0.0947418
ENSMUSG00000038059	Smim3	0.462207	0.229876	0.694537	5.29252	4.00901	0.000231455	0.00948582	-0.100994
ENSMUSG00000070498	Tmem132b	0.468415	0.232522	0.704309	5.23508	4.0015	0.000236904	0.0095807	-0.109152
ENSMUSG00000041408	Wapl	0.372641	0.187621	0.557661	6.21418	4.05863	0.000198399	0.00855715	-0.114955
ENSMUSG00000032946	Rasgrp2	0.493238	0.244936	0.74154	5.29061	4.00298	0.000235822	0.0095807	-0.121817
ENSMUSG00000041654	Slc39a11	0.607297	0.294932	0.919663	4.27539	3.91784	0.000306646	0.011785	-0.126431
ENSMUSG00000028982	Slc25a33	0.589763	0.286835	0.892691	4.35156	3.92325	0.000301592	0.011636	-0.164788
ENSMUSG00000032026	Rexo2	0.379818	0.190625	0.56901	6.39214	4.04556	0.000206631	0.00883502	-0.180669
ENSMUSG00000020614	Fam20a	0.750556	0.353918	1.14719	3.17776	3.81326	0.000422105	0.0150479	-0.199998
ENSMUSG00000029729	Zkscan1	0.481915	0.234521	0.72931	4.59722	3.92544	0.000299568	0.0116033	-0.203136
ENSMUSG00000067279	Ppp1r3c	-0.339456	-0.508802	-0.17011	6.94503	-4.03939	0.000210636	0.00892898	-0.270752
ENSMUSG00000001844	Zdhhc4	0.494138	0.239551	0.748725	4.6847	3.91129	0.000312873	0.0119234	-0.27645
ENSMUSG00000022462	Slc38a2	0.479348	0.244628	0.714069	7.11128	4.16394	0.000228733	0.00945269	-0.277005
ENSMUSG00000005881	Ergic3	0.418313	0.20507	0.631557	5.41003	3.95307	0.000275144	0.0108704	-0.278905
ENSMUSG00000046442	Ppm1e	-0.488483	-0.740223	-0.236743	4.70592	-3.91026	0.000313869	0.0119234	-0.284157
ENSMUSG00000028691	Prdx1	-0.281119	-0.420113	-0.142124	8.56543	-4.07567	0.000188142	0.00815033	-0.316717
ENSMUSG00000028042	Zbtb7b	0.802317	0.381175	1.22346	3.77501	3.85319	0.000422795	0.0150479	-0.317357
ENSMUSG00000025006	Sorbs1	0.325566	0.161951	0.489181	6.64772	4.00981	0.000230884	0.00948582	-0.330822
ENSMUSG00000024501	Dpysl3	0.495337	0.238647	0.752027	4.77534	3.88866	0.000335354	0.0126423	-0.343784
ENSMUSG00000037712	Fermt2	0.386537	0.190957	0.582118	6.28746	3.98266	0.000251125	0.0100014	-0.366278
ENSMUSG00000036591	Arhgap21	0.322378	0.160501	0.484256	7.12362	4.01317	0.000228492	0.00945269	-0.367677
ENSMUSG00000028480	Glipr2	0.815929	0.375776	1.25608	2.81032	3.73557	0.000533993	0.0174421	-0.373698
ENSMUSG00000027890	Gstm4	0.550936	0.261195	0.840676	4.2202	3.83177	0.000398988	0.0144963	-0.393667
ENSMUSG00000019806	Aig1	0.384492	0.189394	0.57959	6.42329	3.97138	0.000260025	0.0103143	-0.395294
ENSMUSG00000037242	Clic4	0.310205	0.155109	0.4653	7.87719	4.03049	0.00021654	0.00911873	-0.398453
ENSMUSG00000033863	Klf9	0.263697	0.132683	0.394711	9.07374	4.05596	0.000200054	0.008591	-0.418162
ENSMUSG00000035443	Thyn1	0.475995	0.227615	0.724376	4.83016	3.86182	0.000364043	0.0135175	-0.427224
ENSMUSG00000041598	Cdc42ep4	0.415809	0.201815	0.629803	5.54674	3.91561	0.00030875	0.0118198	-0.429024
ENSMUSG00000069763	Tmem100	0.561979	0.264909	0.85905	4.22625	3.81214	0.00042354	0.0150479	-0.446613
ENSMUSG00000027239	Mdk	0.536016	0.256073	0.815959	4.88931	3.85848	0.000367785	0.0136053	-0.456529
ENSMUSG00000059409	Ppp2r5d	0.508343	0.24099	0.775697	4.62248	3.83159	0.00039921	0.0144963	-0.458906
ENSMUSG00000009470	Tnpo1	0.440432	0.210997	0.669866	5.09745	3.86836	0.000356841	0.0133286	-0.485143
ENSMUSG00000028367	Txn1	-0.376419	-0.569085	-0.183752	6.38931	-3.93706	0.00028905	0.0112869	-0.508726
ENSMUSG00000030876	Mettl9	0.371424	0.18096	0.561888	6.40224	3.92975	0.000295625	0.0114956	-0.537348
ENSMUSG00000048424	Ranbp3l	-0.754302	-1.16808	-0.340524	3.27054	-3.67355	0.00064333	0.019912	-0.644447
ENSMUSG00000039701	Usp53	0.425555	0.199609	0.651501	5.14045	3.79541	0.000445616	0.0154977	-0.691481
ENSMUSG00000020232	Hmg20b	0.569086	0.260005	0.878168	4.08264	3.71033	0.00057613	0.0183127	-0.697553
ENSMUSG00000038459	Abhd17c	0.430212	0.202658	0.657767	5.41851	3.80983	0.000426524	0.0150996	-0.698482
ENSMUSG00000031425	Plp1	-0.52909	-0.784013	-0.274167	10.0346	-4.33164	0.000329305	0.0124619	-0.701255
ENSMUSG00000030428	Ttyh1	-0.301663	-0.45607	-0.147256	8.70564	-3.93698	0.000289115	0.0112869	-0.745007
ENSMUSG00000028670	Lypla2	0.502482	0.233423	0.771541	4.9698	3.7634	0.000490972	0.0166644	-0.750904
ENSMUSG00000068854	Hist2h2be	-0.692596	-1.07492	-0.310269	3.5294	-3.6505	0.000689209	0.021029	-0.751182
ENSMUSG00000034361	Cpne2	0.558107	0.253018	0.863196	4.0281	3.68637	0.000619098	0.0193833	-0.756558
ENSMUSG00000001794	Capns1	0.305829	0.146657	0.465001	6.91512	3.87186	0.000353046	0.0132587	-0.769266
ENSMUSG00000013076	Amotl1	0.364269	0.173466	0.555073	6.57477	3.8472	0.000380666	0.0139771	-0.806081
ENSMUSG00000025809	Itgb1	0.433926	0.201782	0.66607	5.41107	3.76674	0.000486031	0.0166056	-0.831106
ENSMUSG00000027680	Fxr1	0.381069	0.179188	0.582949	6.06658	3.80379	0.000434417	0.0152695	-0.835365
ENSMUSG00000030287	Itpr2	0.442914	0.205526	0.680302	5.32424	3.75982	0.000496302	0.0167876	-0.836942
ENSMUSG00000013275	Slc41a1	0.495029	0.229878	0.76018	5.21547	3.76727	0.000506357	0.0170692	-0.840157
ENSMUSG00000033060	Lmo7	0.364116	0.171999	0.556233	6.52062	3.81928	0.000414447	0.0149398	-0.865802
ENSMUSG00000028333	Anp32b	0.365419	0.170756	0.560083	5.88135	3.78281	0.000462965	0.0159328	-0.873789
ENSMUSG00000022241	Tars	0.513217	0.230674	0.795759	4.23295	3.66036	0.000669204	0.020591	-0.874841
ENSMUSG00000010066	Cacna2d2	0.521934	0.240046	0.803821	5.23082	3.73636	0.000556038	0.0178892	-0.876709
ENSMUSG00000028223	Decr1	0.407249	0.187788	0.62671	5.2484	3.73947	0.00052775	0.0174334	-0.879139
ENSMUSG00000028560	Usp1	0.366554	0.170399	0.562709	5.76533	3.7657	0.000487559	0.0166056	-0.899909
ENSMUSG00000000567	Sox9	0.298995	0.142737	0.455253	7.86243	3.85594	0.000370643	0.0136599	-0.914697
ENSMUSG00000004902	Slc25a18	-0.477805	-0.733015	-0.222595	5.67117	-3.7874	0.000516345	0.0172295	-0.927578
ENSMUSG00000022565	Plec	0.397327	0.182927	0.611727	5.59552	3.73449	0.000535738	0.0174421	-0.959737
ENSMUSG00000027187	Cat	0.397247	0.182851	0.611643	5.57305	3.7338	0.000536842	0.0174421	-0.96028
ENSMUSG00000055945	Prr18	-0.355076	-0.541283	-0.168869	7.71405	-3.85195	0.000407029	0.0147261	-0.971851
ENSMUSG00000038594	Cep85l	0.486395	0.216968	0.755821	4.41238	3.63794	0.000715503	0.0215458	-0.984834
ENSMUSG00000021792	Fam213a	-0.343542	-0.525883	-0.1612	6.91384	-3.79666	0.000443918	0.0154932	-0.987621
ENSMUSG00000029385	Ccng2	-0.555682	-0.862831	-0.248533	4.4006	-3.64573	0.000699083	0.0212457	-0.990711
ENSMUSG00000029062	Cdk11b	0.384746	0.175805	0.593686	5.45455	3.71073	0.000575444	0.0183127	-0.995307
ENSMUSG00000091537	Tma7	-0.48667	-0.744332	-0.229009	6.20995	-3.8459	0.000532791	0.0174421	-1.00028
ENSMUSG00000053907	Mat2a	0.343176	0.161439	0.524914	7.2809	3.80539	0.000432928	0.0152695	-1.0074
ENSMUSG00000030235	Slco1c1	0.408748	0.185439	0.632056	5.19644	3.68857	0.000615026	0.0193459	-1.01016
ENSMUSG00000020265	Sumo3	0.343471	0.162929	0.524012	8.16858	3.84406	0.000420666	0.0150479	-1.0364
ENSMUSG00000060002	Chpt1	-0.296376	-0.453674	-0.139078	7.55819	-3.79689	0.000443616	0.0154932	-1.05759
ENSMUSG00000054312	Mrps21	-0.622748	-0.969904	-0.275592	4.26783	-3.62394	0.000799963	0.023529	-1.0605
ENSMUSG00000032030	Cul5	0.322208	0.148941	0.495475	6.58195	3.74738	0.00051531	0.0172295	-1.08205
ENSMUSG00000029020	Mfn2	0.311762	0.145032	0.478492	7.20558	3.76805	0.00048411	0.0166026	-1.10536
ENSMUSG00000002325	Irf9	0.666055	0.284703	1.04741	3.46208	3.51959	0.00101559	0.0279112	-1.10835
ENSMUSG00000078771	Evi2a	-0.449306	-0.697877	-0.200735	4.99837	-3.6425	0.000705847	0.0213854	-1.11007
ENSMUSG00000025332	Kdm5c	0.436207	0.191143	0.681272	4.35128	3.5869	0.000832675	0.0241892	-1.12468
ENSMUSG00000015837	Sqstm1	0.294956	0.13818	0.451732	8.13175	3.79128	0.000451228	0.0156378	-1.12493
ENSMUSG00000030207	Fam234b	0.463514	0.203334	0.723694	4.53731	3.59002	0.000825034	0.0240379	-1.13061
ENSMUSG00000035805	Mlc1	-0.290973	-0.445696	-0.136249	8.22091	-3.78968	0.000453417	0.0156588	-1.1386
ENSMUSG00000024782	Ak3	0.295992	0.135833	0.456152	6.47424	3.72422	0.000552556	0.0178353	-1.1413
ENSMUSG00000029632	Ndufa4	-0.442652	-0.672283	-0.213022	8.44769	-3.9642	0.000520146	0.0172979	-1.14417
ENSMUSG00000027198	Ext2	0.839474	0.346541	1.33241	2.51789	3.43184	0.00131229	0.0339909	-1.14642
ENSMUSG00000091896	Ube2d2a	0.291354	0.134856	0.447851	7.28249	3.75164	0.000508718	0.0170905	-1.15733
ENSMUSG00000020075	Ddx21	0.430401	0.19063	0.670172	5.01579	3.61729	0.00076087	0.0227043	-1.16501
ENSMUSG00000066036	Ubr4	0.318708	0.146482	0.490935	7.0877	3.72907	0.000544545	0.0176343	-1.19855
ENSMUSG00000038398	Upf3a	0.348356	0.156041	0.540672	5.66508	3.6502	0.000689824	0.021029	-1.22067
ENSMUSG00000020163	Uqcr11	-0.339243	-0.521502	-0.156985	7.67821	-3.75614	0.000524555	0.017386	-1.22242
ENSMUSG00000028868	Wasf2	0.400122	0.176163	0.624082	5.14936	3.60023	0.000800418	0.023529	-1.23276
ENSMUSG00000021115	Vrk1	0.519417	0.222886	0.815948	4.18526	3.52983	0.000985467	0.0274118	-1.23435
ENSMUSG00000026083	Eif5b	0.284395	0.130291	0.438499	7.23522	3.7189	0.000561472	0.0180054	-1.25057
ENSMUSG00000005625	Psmd4	0.291823	0.132274	0.451373	6.56335	3.68581	0.00062014	0.0193833	-1.25228
ENSMUSG00000057554	Lgals8	0.502501	0.215478	0.789524	4.25649	3.528	0.000990788	0.0274118	-1.2617
ENSMUSG00000028673	Fuca1	0.385501	0.16921	0.601791	5.02281	3.59166	0.000821022	0.0239918	-1.26212
ENSMUSG00000024208	Uqcc2	-0.293655	-0.452119	-0.13519	7.90558	-3.73433	0.000535998	0.0174421	-1.27081
ENSMUSG00000023913	Pla2g7	0.322166	0.146392	0.49794	6.85522	3.69346	0.000606073	0.0191252	-1.28544
ENSMUSG00000014907	Naf1	0.438017	0.190528	0.685507	4.95256	3.56651	0.000884474	0.0252484	-1.28841
ENSMUSG00000041870	Ankrd13a	0.583728	0.246947	0.92051	4.03884	3.49278	0.00109866	0.0298939	-1.29682
ENSMUSG00000032816	Igdcc4	-0.418959	-0.652245	-0.185673	5.60711	-3.61902	0.000756978	0.0226566	-1.29917
ENSMUSG00000034795	Ccdc122	0.700509	0.289368	1.11165	3.3421	3.43345	0.00130618	0.0339909	-1.31657
ENSMUSG00000036840	Siah1a	0.660924	0.280823	1.04102	4.03807	3.51934	0.0011352	0.0303859	-1.33653
ENSMUSG00000021127	Zfp36l1	0.499484	0.221955	0.777012	5.53174	3.65298	0.000836332	0.0242242	-1.33918
ENSMUSG00000032340	Neo1	0.386342	0.170299	0.602385	5.63165	3.60363	0.000792396	0.0234326	-1.33921
ENSMUSG00000074749	Kiz	0.503271	0.209929	0.796612	3.86643	3.45729	0.00121864	0.0321832	-1.35764
ENSMUSG00000033720	Sfxn5	-0.306063	-0.472514	-0.139612	8.1518	-3.70537	0.000584794	0.0185128	-1.37592
ENSMUSG00000035559	Mpv17l2	0.516962	0.21374	0.820185	3.8237	3.43562	0.00129797	0.0339154	-1.39088
ENSMUSG00000024120	Lrpprc	0.480858	0.213021	0.748694	5.97301	3.64448	0.000859496	0.024678	-1.39846
ENSMUSG00000027221	Chst1	0.283766	0.129635	0.437896	8.77963	3.71005	0.000576619	0.0183127	-1.41282
ENSMUSG00000023249	Parp3	0.78424	0.310579	1.2579	2.54437	3.33648	0.00172794	0.0403472	-1.41368
ENSMUSG00000031545	Gpat4	0.481636	0.20664	0.756633	5.20615	3.53099	0.000993796	0.0274182	-1.43135
ENSMUSG00000034168	Irf2bpl	0.337123	0.150559	0.523687	6.98306	3.6414	0.000708171	0.0213902	-1.44483
ENSMUSG00000015750	Aph1a	0.626489	0.253977	0.999002	3.53976	3.38907	0.00148531	0.0370466	-1.45628
ENSMUSG00000081534	Slc48a1	0.279434	0.126479	0.432388	8.3753	3.68149	0.000628211	0.0195121	-1.46294
ENSMUSG00000022454	Nell2	0.32404	0.143809	0.50427	6.9141	3.62307	0.0007479	0.0224529	-1.4681
ENSMUSG00000026568	Mpc2	-0.309775	-0.480744	-0.138805	7.46664	-3.65119	0.000687776	0.021029	-1.46851
ENSMUSG00000026547	Tagln2	0.718086	0.288713	1.14746	3.5086	3.37015	0.00156861	0.0383495	-1.47913
ENSMUSG00000033022	Cdo1	0.474611	0.198957	0.750264	4.50989	3.46962	0.0011756	0.0311298	-1.4869
ENSMUSG00000028565	Nfia	0.24029	0.108864	0.371716	9.00133	3.68436	0.00062283	0.019406	-1.50629
ENSMUSG00000026688	Mgst3	-0.576377	-0.904703	-0.248051	4.99666	-3.57589	0.00113383	0.0303859	-1.5118
ENSMUSG00000056854	Pou3f4	0.507134	0.214845	0.799423	4.97707	3.50232	0.00111523	0.0301785	-1.51194
ENSMUSG00000038855	Itpkb	0.431237	0.18183	0.680644	4.86077	3.4843	0.00112626	0.0303109	-1.51314
ENSMUSG00000001891	Ugp2	0.304017	0.134519	0.473514	6.96711	3.61444	0.000767339	0.0228283	-1.52544
ENSMUSG00000028788	Ptp4a2	0.21597	0.0974681	0.334472	8.92177	3.67262	0.000645118	0.019912	-1.5339
ENSMUSG00000001964	Emd	0.413746	0.174553	0.652938	4.99638	3.48573	0.00112154	0.0302663	-1.54321
ENSMUSG00000036782	Klhl13	0.392827	0.170586	0.615068	6.1287	3.56499	0.00090922	0.0256582	-1.54984
ENSMUSG00000031983	RP24-227L14.1	-0.401599	-0.630787	-0.17241	5.61621	-3.53108	0.000981846	0.0273946	-1.5527
ENSMUSG00000034867	Ankrd27	0.459332	0.189072	0.729592	4.41607	3.42494	0.00133885	0.034527	-1.56968
ENSMUSG00000058656	Samd12	0.327343	0.142146	0.512539	6.26103	3.56186	0.000896682	0.0253769	-1.57659
ENSMUSG00000078184	Rbm8a2	0.747865	0.288977	1.20675	2.84606	3.28416	0.00200642	0.0443343	-1.59844
ENSMUSG00000037996	Slc24a2	0.351831	0.153363	0.5503	6.8653	3.57416	0.000876806	0.0251021	-1.61331
ENSMUSG00000021643	Serf1	-0.381689	-0.600262	-0.163116	5.79922	-3.51901	0.00101732	0.0279112	-1.61397
ENSMUSG00000028132	Tmem56	0.35141	0.151046	0.551773	5.99225	3.5343	0.000972595	0.0272134	-1.61567
ENSMUSG00000025492	Ifitm3	0.786024	0.331141	1.24091	4.62664	3.57027	0.00158387	0.038511	-1.64391
_x0017_ÉË|ENSMUSG00000026126	Ptpn18	-0.621007	-1.00115	-0.240862	3.21698	-3.29196	0.00196236	0.0439175	-1.64786
ENSMUSG00000034088	Hdlbp	0.328833	0.139856	0.517809	5.84844	3.50651	0.00105532	0.0288738	-1.65409
ENSMUSG00000022365	Derl1	0.374726	0.157241	0.59221	5.41561	3.47211	0.0011671	0.0309879	-1.65531
ENSMUSG00000024227	Pdzph1	-0.751769	-1.21387	-0.289671	3.08407	-3.27837	0.00203973	0.0445566	-1.66084
ENSMUSG00000062044	Lmtk3	0.450965	0.180992	0.720938	4.17651	3.36612	0.00158692	0.038511	-1.67268
ENSMUSG00000042804	Gpr153	-0.583305	-0.936417	-0.230193	3.73047	-3.32882	0.00176629	0.0410485	-1.69223
ENSMUSG00000042772	Smg7	0.290021	0.1256	0.454443	7.04135	3.5545	0.000916378	0.0257865	-1.69689
ENSMUSG00000026176	Ctdsp1	0.677153	0.261298	1.09301	3.21984	3.28135	0.00202255	0.0444852	-1.70825
ENSMUSG00000016252	Atp5e	-0.298898	-0.465916	-0.131879	8.67633	-3.61141	0.000805213	0.0235997	-1.716
ENSMUSG00000043279	Trim56	0.493899	0.199619	0.788178	4.52359	3.3821	0.00151553	0.0374222	-1.71731
ENSMUSG00000008348	Ubc	0.291867	0.127417	0.456318	8.0113	3.5765	0.00085873	0.024678	-1.72899
ENSMUSG00000021290	RP23-123N23.5	-0.315585	-0.489478	-0.141691	9.86881	-3.68877	0.000785887	0.0233099	-1.73148
ENSMUSG00000064264	Zfp428	0.458155	0.186263	0.730046	4.81429	3.39566	0.00145732	0.0365328	-1.73176
ENSMUSG00000021782	Dlg5	0.459982	0.184634	0.735329	4.42689	3.36641	0.00158561	0.038511	-1.7415
ENSMUSG00000025555	Farp1	0.441812	0.17941	0.704215	4.74078	3.39295	0.00146878	0.036727	-1.75127
ENSMUSG00000027820	Mme	0.625556	0.240809	1.0103	3.46099	3.27642	0.00205108	0.0446223	-1.75866
ENSMUSG00000087370	Tmem170b	-0.480959	-0.767204	-0.194714	4.62359	-3.38593	0.00149887	0.0372904	-1.76046
ENSMUSG00000078786	AC157561.9	0.595912	0.228132	0.963692	3.36644	3.26514	0.00211784	0.0455728	-1.76829
ENSMUSG00000018398	2023-09-08	0.248806	0.108092	0.38952	8.11923	3.56312	0.000893353	0.0253553	-1.77934
ENSMUSG00000021458	AC130827.2	-0.537682	-0.868037	-0.207326	3.65649	-3.27983	0.00203127	0.0444852	-1.79638
ENSMUSG00000010663	Fads1	-0.278155	-0.43546	-0.120851	8.36358	-3.56331	0.000892868	0.0253553	-1.79908
ENSMUSG00000032763	Ilvbl	0.630688	0.237283	1.02409	3.34231	3.23059	0.00233532	0.048682	-1.81295
ENSMUSG00000003585	Sec14l2	0.440092	0.177565	0.702619	4.98174	3.37814	0.00153293	0.0376636	-1.82191
ENSMUSG00000033326	Kdm4a	0.419397	0.17089	0.667905	5.27832	3.4009	0.0014354	0.0360749	-1.82741
ENSMUSG00000049470	Aff4	0.27699	0.117121	0.436858	6.63034	3.49147	0.00110288	0.0299262	-1.82744
ENSMUSG00000023951	Vegfa	0.430702	0.174267	0.687136	4.94691	3.3846	0.0015046	0.0373391	-1.83078
ENSMUSG00000032437	Stt3b	0.442016	0.181107	0.702925	5.3726	3.41875	0.0014088	0.0355906	-1.83175
ENSMUSG00000008393	Carhsp1	-0.339363	-0.539357	-0.13937	5.54799	-3.41945	0.00136032	0.0348367	-1.83985
ENSMUSG00000032501	Trib1	0.775906	0.316065	1.23575	4.64073	3.48849	0.00196071	0.0439175	-1.84388
ENSMUSG00000013523	Bcas1	0.352759	0.154603	0.550916	8.64984	3.62621	0.000988329	0.0274118	-1.84863
ENSMUSG00000013698	Pea15a	-0.238361	-0.37244	-0.104282	10.0467	-3.58246	0.000843693	0.0243659	-1.8683
ENSMUSG00000032648	Pygm	-0.473341	-0.756544	-0.190139	5.0036	-3.37229	0.00160324	0.0387168	-1.87324
ENSMUSG00000032667	Pon2	0.317683	0.132178	0.503189	6.18247	3.451	0.00124118	0.032604	-1.87527
ENSMUSG00000022887	Masp1	-0.813069	-1.33218	-0.293954	2.66397	-3.15625	0.00287715	0.0539234	-1.88524
ENSMUSG00000031379	Pir	0.589733	0.216942	0.962523	3.02038	3.18785	0.00263372	0.0516135	-1.89725
ENSMUSG00000031647	Mfap3l	-0.286335	-0.453435	-0.119235	6.50363	-3.45308	0.0012337	0.032494	-1.90424
ENSMUSG00000037355	Uvssa	0.487757	0.19085	0.784663	4.52557	3.31048	0.00186141	0.0423621	-1.90596
ENSMUSG00000025212	Sfxn3	0.347316	0.141853	0.552779	5.76197	3.40643	0.00141263	0.0355931	-1.90918
ENSMUSG00000002083	Bbc3	0.603348	0.220935	0.98576	3.16529	3.17938	0.00269698	0.0522316	-1.91238
ENSMUSG00000024835	Coro1b	0.461557	0.178561	0.744554	4.29619	3.28664	0.00199232	0.0442205	-1.91281
ENSMUSG00000038900	Rpl12	-0.270728	-0.424645	-0.116812	9.19917	-3.54478	0.000944971	0.0265156	-1.91767
ENSMUSG00000020097	Sgpl1	0.471434	0.182275	0.760593	4.36223	3.28543	0.00199921	0.0442739	-1.92115
ENSMUSG00000045312	Lhfpl2	0.554262	0.210853	0.897671	3.92974	3.25245	0.00219536	0.0464316	-1.92906
ENSMUSG00000034453	Polr3b	0.661726	0.238561	1.08489	2.96367	3.1512	0.00291797	0.0543109	-1.94031
ENSMUSG00000034951	Cog7	0.440607	0.17255	0.708663	4.72636	3.31232	0.00185163	0.0423462	-1.94057
ENSMUSG00000018377	Vezf1	0.2814	0.116918	0.445881	6.64797	3.44758	0.0012536	0.032843	-1.94209
ENSMUSG00000025591	Tma16	0.530065	0.197417	0.862713	3.59219	3.21108	0.00246732	0.0497888	-1.94301
ENSMUSG00000064325	Hhip	0.712438	0.25437	1.17051	2.71363	3.13419	0.00305952	0.0560647	-1.94383
ENSMUSG00000006301	Tmbim1	0.534189	0.201958	0.86642	3.96949	3.24013	0.00227325	0.047874	-1.95369
ENSMUSG00000027012	Dync1i2	0.322561	0.135878	0.509245	7.50911	3.48678	0.00115805	0.0309136	-1.95736
ENSMUSG00000030291	Med21	-0.403078	-0.645753	-0.160402	5.18035	-3.34712	0.00167603	0.03979	-1.96453
ENSMUSG00000075229	Ccdc58	-0.80798	-1.32904	-0.286921	2.53371	-3.12479	0.00314044	0.0569139	-1.96807
ENSMUSG00000041133	Smc1a	0.336465	0.137527	0.535403	6.16639	3.40824	0.00140524	0.0355906	-1.96913
ENSMUSG00000062234	Gak	0.349886	0.141328	0.558444	5.73971	3.3807	0.00152162	0.037479	-1.97056
ENSMUSG00000038742	Angptl6	0.600687	0.226913	0.97446	4.06791	3.24228	0.00231211	0.0484856	-1.97538
ENSMUSG00000021072	Tmx1	0.359553	0.144111	0.574995	5.56757	3.36311	0.00160074	0.0387168	-1.98164
ENSMUSG00000020121	Srgap1	0.465964	0.178103	0.753826	4.27024	3.26195	0.00213708	0.0457873	-1.98499
ENSMUSG00000025246	Tbl1x	0.309042	0.126418	0.491666	6.26057	3.4101	0.00139772	0.0355805	-1.98707
ENSMUSG00000006498	Ptbp1	0.453413	0.174653	0.732174	4.56719	3.27771	0.00204355	0.0445566	-2.00741
ENSMUSG00000033933	Vhl	0.286191	0.117198	0.455184	6.40117	3.41267	0.00138734	0.0354076	-2.0083
ENSMUSG00000030695	Aldoa	0.264062	0.11225	0.415875	9.02478	3.50515	0.00105953	0.0289089	-2.01452
ENSMUSG00000074754	RP23-70J9.6	-0.468532	-0.749988	-0.187075	5.3901	-3.37442	0.00176436	0.0410485	-2.02757
ENSMUSG00000003031	Cdkn1b	0.356768	0.14185	0.571686	5.53427	3.34518	0.00168536	0.03979	-2.03431
ENSMUSG00000024613	Tcof1	0.485146	0.18065	0.789642	3.90191	3.21069	0.00247003	0.0497888	-2.03439
ENSMUSG00000026827	Gpd2	0.247466	0.103875	0.391056	8.17313	3.47293	0.00116428	0.0309879	-2.03749
ENSMUSG00000023019	Gpd1	0.391508	0.152869	0.630146	5.0106	3.30603	0.0018852	0.042805	-2.04258
ENSMUSG00000033460	Armcx1	-0.411469	-0.661867	-0.161071	5.19012	-3.31142	0.00185642	0.0423462	-2.05578
ENSMUSG00000030077	Chl1	0.369096	0.149673	0.588519	6.43981	3.39523	0.0015144	0.0374222	-2.06291
ENSMUSG00000078713	Tomm5	-0.547001	-0.880831	-0.213171	4.86955	-3.33224	0.00211543	0.0455728	-2.07436
ENSMUSG00000024194	Cuta	0.456887	0.171781	0.741993	4.36064	3.22931	0.00234381	0.048682	-2.09
ENSMUSG00000021047	Nova1	0.364348	0.143289	0.585408	5.57881	3.32135	0.00180443	0.0414474	-2.09418
ENSMUSG00000055137	Sugct	-0.575727	-0.945455	-0.205999	3.38245	-3.13792	0.00302789	0.0557957	-2.09676
ENSMUSG00000041431	Ccnb1	-0.694761	-1.14876	-0.240759	2.76145	-3.08379	0.00351782	0.0624919	-2.10563
ENSMUSG00000022350	Washc5	0.418809	0.157375	0.680243	4.40807	3.22821	0.00235105	0.048682	-2.11203
ENSMUSG00000024065	Ehd3	0.339351	0.135079	0.543622	6.05307	3.34772	0.00167314	0.03979	-2.1137
ENSMUSG00000030064	Frmd4b	0.473811	0.177019	0.770603	4.38921	3.21707	0.0024261	0.0495096	-2.11685
ENSMUSG00000020893	Per1	0.573478	0.20858	0.938376	3.76904	3.16703	0.00279179	0.0533356	-2.12169
ENSMUSG00000001783	Rtcb	0.341224	0.135147	0.547302	5.85684	3.3367	0.00172688	0.0403472	-2.12224
ENSMUSG00000068328	Aup1	0.46346	0.169326	0.757594	4.16271	3.17523	0.00272851	0.0525958	-2.16428
ENSMUSG00000022797	Tfrc	-0.435853	-0.699984	-0.171723	5.82798	-3.34584	0.00191926	0.0431812	-2.16696
ENSMUSG00000036949	Slc39a12	-0.481309	-0.783832	-0.178786	4.39166	-3.20607	0.00250235	0.0500317	-2.17048
ENSMUSG00000024480	Ap3s1	-0.694971	-1.15403	-0.235908	2.84273	-3.05072	0.00385286	0.0659264	-2.17408
ENSMUSG00000036966	Spryd3	0.302285	0.119929	0.48464	6.30828	3.34045	0.00170838	0.0400799	-2.17736
ENSMUSG00000079477	Rab7	0.282138	0.112131	0.452146	6.32492	3.34427	0.00168975	0.03979	-2.18289
ENSMUSG00000074994	Qser1	0.327327	0.128141	0.526514	5.82104	3.31154	0.00185575	0.0423462	-2.18467
ENSMUSG00000022763	Aifm3	-0.59962	-0.98754	-0.211699	3.48966	-3.11488	0.00322804	0.0581813	-2.18558
ENSMUSG00000024976	Shoc2	0.300116	0.118131	0.482101	6.04818	3.32324	0.00179475	0.0413858	-2.18861
ENSMUSG00000068523	Gng5	0.751941	0.256109	1.24777	2.7616	3.05604	0.00379733	0.065456	-2.18963
ENSMUSG00000027422	Rrbp1	0.343212	0.1338	0.552623	5.74329	3.3027	0.00190318	0.0430155	-2.19252
ENSMUSG00000034780	B3galt1	0.425553	0.160092	0.691015	4.79885	3.23043	0.00233642	0.048682	-2.19499
ENSMUSG00000020964	Sel1l	0.322679	0.128741	0.516617	6.6612	3.35286	0.0016486	0.0393961	-2.19627
ENSMUSG00000046058	Eid2	0.374671	0.146142	0.6032	5.92891	3.30382	0.00189714	0.0429772	-2.19902
ENSMUSG00000022475	Hdac7	0.501426	0.184229	0.818623	4.50666	3.18556	0.00265072	0.0518439	-2.20643
ENSMUSG00000090115	Usp49	-0.731584	-1.21423	-0.248937	2.91838	-3.05452	0.00381292	0.065496	-2.20777
ENSMUSG00000030058	Copg1	0.297531	0.118288	0.476775	6.6466	3.34501	0.00168617	0.03979	-2.21353
ENSMUSG00000066324	Impad1	0.255193	0.104268	0.406119	8.24029	3.40734	0.00140892	0.0355906	-2.22172
ENSMUSG00000040451	Sgms1	0.423946	0.15687	0.691021	4.67849	3.19878	0.00255418	0.0507598	-2.23019
ENSMUSG00000022114	Spry2	0.420157	0.157624	0.682689	4.96137	3.22505	0.00237214	0.0488117	-2.23275
ENSMUSG00000024621	Csf1r	0.41283	0.158353	0.667307	5.65818	3.27372	0.00212719	0.0456744	-2.2435
ENSMUSG00000024661	Fth1	-0.331498	-0.520072	-0.142924	11.661	-3.62213	0.00131138	0.0339909	-2.2547
ENSMUSG00000026764	Kif5c	-0.222206	-0.352706	-0.0917049	9.54435	-3.43123	0.00131462	0.0339909	-2.25924
ENSMUSG00000040659	Efhd2	-0.321271	-0.511553	-0.130989	8.07268	-3.42139	0.00153785	0.0376908	-2.26094
ENSMUSG00000042751	Nmnat2	0.334094	0.129498	0.53869	6.06702	3.29064	0.00196977	0.0439175	-2.27398
ENSMUSG00000021022	Ppp2r3c	0.431285	0.16209	0.70048	5.26714	3.23105	0.00236841	0.0488117	-2.27737
ENSMUSG00000046352	Gjb2	0.904997	0.296941	1.51305	2.5153	3.01333	0.00458944	0.0734682	-2.27761
ENSMUSG00000024360	Etf1	0.320318	0.122957	0.517679	5.72665	3.2706	0.00208526	0.045167	-2.27813
ENSMUSG00000023026	Dip2b	0.358754	0.134855	0.582653	5.22933	3.22888	0.00234664	0.048682	-2.27907
ENSMUSG00000025290	Rps24	-0.258356	-0.41044	-0.106271	9.65354	-3.42621	0.00136144	0.0348367	-2.29395
ENSMUSG00000033065	Pfkm	0.27089	0.1066	0.435181	6.66962	3.32269	0.00179756	0.0413858	-2.29513
ENSMUSG00000062866	Phactr2	0.313784	0.119515	0.508053	5.65538	3.25488	0.00218029	0.0463132	-2.30243
ENSMUSG00000062202	Btbd9	0.329976	0.127682	0.53227	6.15499	3.28705	0.00198997	0.0442205	-2.30463
ENSMUSG00000022255	Mtdh	0.266509	0.105897	0.427121	7.35784	3.34381	0.00169199	0.03979	-2.31225
ENSMUSG00000005262	Ufd1l	0.325501	0.121757	0.529244	5.24673	3.2194	0.00241019	0.0492867	-2.32
ENSMUSG00000029462	Vps29	-0.265291	-0.424765	-0.105818	7.81964	-3.35229	0.00165131	0.0393961	-2.33521
ENSMUSG00000023944	Hsp90ab1	0.208369	0.0855637	0.331173	10.223	3.4192	0.00136134	0.0348367	-2.3375
ENSMUSG00000031231	Cox7b	-0.453031	-0.715877	-0.190184	9.30688	-3.59224	0.00179118	0.0413858	-2.33959
ENSMUSG00000040415	Dtx3	0.402719	0.146252	0.659186	4.68465	3.1643	0.0028132	0.0534346	-2.34628
ENSMUSG00000030082	Sec61a1	0.390249	0.143658	0.636839	5.24907	3.18913	0.00262427	0.0516135	-2.36138
ENSMUSG00000038668	Lpar1	-0.281452	-0.453271	-0.109633	6.77474	-3.30096	0.00191266	0.043131	-2.36218
ENSMUSG00000034663	Bmp2k	0.443038	0.161897	0.724179	4.79165	3.17693	0.00273709	0.0525958	-2.36412
ENSMUSG00000022890	Atp5j	-0.32795	-0.525561	-0.130339	7.5651	-3.36052	0.00179252	0.0413858	-2.36486
ENSMUSG00000054679	Srsf12	-0.635694	-1.06137	-0.210017	3.05608	-3.00937	0.00431395	0.0708612	-2.36954
ENSMUSG00000022040	Ephx2	-0.394417	-0.647127	-0.141707	4.65571	-3.14515	0.00296761	0.0548896	-2.37578
ENSMUSG00000026878	Rab14	0.252324	0.100685	0.403963	8.27897	3.35317	0.00164714	0.0393961	-2.37603
ENSMUSG00000014195	Dnajc7	0.366026	0.137157	0.594895	5.64709	3.2228	0.00238725	0.0489459	-2.38393
ENSMUSG00000027199	Gatm	-0.486235	-0.783014	-0.189455	6.21364	-3.37035	0.00238857	0.0489459	-2.38804
ENSMUSG00000039568	Ubald1	0.359442	0.137206	0.581679	6.19789	3.26361	0.00218507	0.0463132	-2.38968
ENSMUSG00000005982	Naa60	0.289818	0.11236	0.467276	6.92319	3.29108	0.00196729	0.0439175	-2.39452
ENSMUSG00000031311	Nono	0.337849	0.124817	0.55088	5.40658	3.19585	0.00257529	0.050891	-2.40732
ENSMUSG00000025893	Kbtbd3	-0.564853	-0.938871	-0.190835	3.75559	-3.04334	0.00393157	0.0666074	-2.41555
ENSMUSG00000068740	Celsr2	0.405071	0.148752	0.661389	5.30889	3.18505	0.00266116	0.0519452	-2.41796
ENSMUSG00000044148	RP24-392J24.4	0.38327	0.13995	0.626591	5.22475	3.1742	0.00273643	0.0525958	-2.41997
ENSMUSG00000020541	Tom1l1	-0.456582	-0.755492	-0.157672	4.06649	-3.07812	0.00357324	0.063023	-2.4236
ENSMUSG00000073616	Cops9	-0.277141	-0.443038	-0.111244	9.1705	-3.37646	0.00164637	0.0393961	-2.42638
ENSMUSG00000027270	Lamp5	-0.419834	-0.687338	-0.152331	5.06228	-3.16288	0.00282754	0.0535012	-2.43125
ENSMUSG00000028470	Hint2	0.306013	0.113125	0.4989	5.50216	3.19701	0.00256693	0.050891	-2.43273
ENSMUSG00000025228	Actr1a	0.333676	0.124511	0.542841	5.83004	3.21473	0.00244213	0.0496315	-2.43301
ENSMUSG00000025739	Gng13	-0.368603	-0.594626	-0.14258	6.73667	-3.31009	0.00216111	0.0462019	-2.43547
ENSMUSG00000021831	Ero1l	0.589742	0.190256	0.989228	3.25211	2.97487	0.00473773	0.0747517	-2.44344
ENSMUSG00000000594	Gm2a	0.389383	0.142808	0.635958	5.38699	3.18226	0.00267531	0.0520158	-2.4485
ENSMUSG00000027472	Pdrg1	0.370622	0.135599	0.605645	5.5138	3.17782	0.00270882	0.0523582	-2.46588
ENSMUSG00000070056	Mfhas1	0.412007	0.149745	0.674269	5.30743	3.16843	0.00282473	0.0535012	-2.4673
ENSMUSG00000020840	Blmh	0.419398	0.149961	0.688834	5.16932	3.13673	0.00303796	0.055877	-2.46942
ENSMUSG00000031765	Mt1	-0.205044	-0.328031	-0.0820576	9.84703	-3.35967	0.00161664	0.0389452	-2.47579
ENSMUSG00000022489	Pde1b	0.326365	0.127164	0.525566	7.51498	3.31879	0.00202723	0.0444852	-2.4773
ENSMUSG00000059456	Ptk2b	0.311051	0.118454	0.503648	6.80163	3.25454	0.00218241	0.0463132	-2.48138
ENSMUSG00000041828	Abca8a	-0.757941	-1.28429	-0.231594	2.41019	-2.90183	0.00576677	0.0824377	-2.48525
ENSMUSG00000095930	Nim1k	0.338664	0.124626	0.552701	5.64171	3.1885	0.00262891	0.0516135	-2.48561
ENSMUSG00000008976	Gabpa	0.569134	0.181517	0.95675	3.20993	2.95883	0.0049478	0.0765402	-2.49126
ENSMUSG00000021540	Smad5	0.266328	0.100337	0.432318	6.43548	3.23326	0.00231777	0.0485014	-2.49971
ENSMUSG00000028932	Psmc2	0.286209	0.10663	0.465788	6.12665	3.2117	0.00246308	0.0497888	-2.50234
ENSMUSG00000022897	Dyrk1a	0.280188	0.104557	0.455818	6.20446	3.21482	0.00244149	0.0496315	-2.50787
ENSMUSG00000002546	Golga2	0.298821	0.111301	0.486342	6.2445	3.21123	0.00246633	0.0497888	-2.51264
ENSMUSG00000073643	Wdfy1	1.10645	0.382832	1.83008	4.16314	3.21451	0.00484935	0.0757865	-2.51587
ENSMUSG00000046691	Chtf8	0.305281	0.11358	0.496983	6.25835	3.20909	0.00248121	0.0498108	-2.51605
ENSMUSG00000037815	Ctnna1	0.375274	0.135103	0.615445	5.29953	3.14873	0.0029381	0.0545482	-2.51742
ENSMUSG00000003813	Rad23a	0.414545	0.143156	0.685934	4.62654	3.07813	0.00357314	0.063023	-2.5287
ENSMUSG00000038633	Degs1	-0.387715	-0.63423	-0.141201	5.6357	-3.17387	0.00281133	0.0534346	-2.53355
ENSMUSG00000067377	Tspan6	-0.482298	-0.802471	-0.162125	4.09482	-3.03555	0.00401631	0.0676657	-2.53482
ENSMUSG00000049792	Bag5	0.360691	0.125835	0.595547	4.79575	3.09486	0.00341196	0.0607206	-2.54137
ENSMUSG00000037172	RP23-83N17.1	-0.404372	-0.666952	-0.141792	4.86444	-3.10332	0.00333304	0.0596385	-2.54258
ENSMUSG00000018593	Sparc	-0.339547	-0.547144	-0.131949	7.96753	-3.32957	0.00217348	0.0463132	-2.55064
ENSMUSG00000051527	Usp29	0.372625	0.133768	0.611481	5.51379	3.14371	0.00297953	0.0550071	-2.56353
ENSMUSG00000034931	Dhx8	0.456991	0.149494	0.764489	3.85946	2.99485	0.00448785	0.0724608	-2.56714
ENSMUSG00000032554	Trf	0.379717	0.134291	0.625143	5.27974	3.1178	0.00320202	0.0578178	-2.57155
ENSMUSG00000014748	Tex261	0.34639	0.123066	0.569714	5.32334	3.12563	0.00313312	0.0569139	-2.57716
ENSMUSG00000034681	Rnps1	0.643178	0.194994	1.09136	2.98521	2.89189	0.00592178	0.0834947	-2.57899
ENSMUSG00000044792	Isca1	0.289883	0.105715	0.474051	5.99825	3.17187	0.00275426	0.0528231	-2.58341
ENSMUSG00000061518	Cox5b	-0.251972	-0.406641	-0.0973037	8.61988	-3.2829	0.0020136	0.0443936	-2.59455
ENSMUSG00000035828	Pim3	0.436474	0.15542	0.717527	5.39116	3.14503	0.00324067	0.0583026	-2.595
ENSMUSG00000001020	S100a4	-0.610207	-1.03399	-0.186424	3.14719	-2.90163	0.00576983	0.0824377	-2.59829
ENSMUSG00000040253	Gbp7	0.522602	0.171471	0.873734	4.04034	2.99923	0.00443474	0.0720941	-2.60005
ENSMUSG00000023460	Rab12	0.23874	0.0895919	0.387887	7.29742	3.22564	0.00236821	0.0488117	-2.62298
ENSMUSG00000038002	Cramp1l	-0.375291	-0.621548	-0.129034	4.81737	-3.07106	0.00364343	0.0638053	-2.62742
ENSMUSG00000022698	Naa50	0.273972	0.0995337	0.448411	6.13043	3.16499	0.00280782	0.0534346	-2.62855
ENSMUSG00000007564	Ppp2r1a	0.278613	0.103702	0.453525	7.01243	3.2099	0.00247556	0.0497986	-2.6301
ENSMUSG00000039016	Timm8b	-0.322004	-0.5203	-0.123708	8.26039	-3.30188	0.0022889	0.048101	-2.6341
ENSMUSG00000017765	Slc12a4	0.58243	0.176427	0.988434	3.12885	2.89082	0.00593874	0.0835569	-2.63619
ENSMUSG00000032601	Prkar2a	0.309017	0.113356	0.504678	6.60791	3.18263	0.00267258	0.0520158	-2.64353
ENSMUSG00000018678	Sp2	0.56482	0.173631	0.95601	3.26484	2.90958	0.00564834	0.0818015	-2.64377
ENSMUSG00000060373	Hnrnpc	0.244936	0.0910039	0.398868	7.09628	3.2065	0.00249935	0.0500317	-2.65403
ENSMUSG00000007872	Id3	-0.382628	-0.628047	-0.137209	5.87155	-3.1523	0.00308927	0.0564197	-2.65541
ENSMUSG00000024604	Rbm22	0.449085	0.144605	0.753566	4.08306	2.97219	0.00477223	0.0750562	-2.66248
ENSMUSG00000031600	Vps37a	0.263787	0.0966018	0.430973	6.67303	3.17953	0.00269586	0.0522316	-2.66316
πÇF}ENSMUSG00000020358	Hnrnpab	0.270757	0.0980774	0.443436	6.24391	3.1597	0.00284954	0.0537117	-2.66746
ENSMUSG00000026556	Vangl2	0.563728	0.180847	0.946609	4.08672	2.97324	0.00491195	0.0764039	-2.67068
ENSMUSG00000022112	Gpc5	-0.322009	-0.529748	-0.114271	5.77141	-3.12363	0.00315063	0.0569941	-2.67088
ENSMUSG00000045136	Tubb2b	0.481756	0.192204	0.771308	9.62395	3.49024	0.00254659	0.0507111	-2.673
ENSMUSG00000037434	Slc30a1	0.352491	0.120809	0.584174	5.12195	3.06593	0.00369518	0.0643692	-2.67391
ENSMUSG00000033904	Ccp110	-0.437296	-0.728803	-0.14579	4.57354	-3.02298	0.00415673	0.0695865	-2.68256
ENSMUSG00000021520	Uqcrb	-0.320344	-0.521508	-0.119179	7.23162	-3.22149	0.00258139	0.050891	-2.68391
ENSMUSG00000071711	Mpst	0.455324	0.145133	0.765516	4.00122	2.95801	0.00495883	0.0765402	-2.68417
ENSMUSG00000057841	Rpl32	-0.218238	-0.352928	-0.083548	9.26371	-3.26514	0.00211779	0.0455728	-2.69019
ENSMUSG00000052833	Sae1	0.33656	0.121816	0.551303	6.49376	3.163	0.00290193	0.0541821	-2.69575
ENSMUSG00000028528	Dnajc6	-0.357767	-0.587156	-0.128379	6.10791	-3.15068	0.00305465	0.0560647	-2.696
ENSMUSG00000023025	Larp4	0.406112	0.140429	0.671796	5.38809	3.08621	0.0036102	0.0634482	-2.70592
ENSMUSG00000040354	Mars	0.419883	0.134257	0.70551	4.15979	2.96236	0.00490087	0.0764039	-2.70995
ENSMUSG00000037851	Iars	0.44995	0.149867	0.750033	4.75436	3.02504	0.00420997	0.0701212	-2.72304
ENSMUSG00000028563	Tm2d1	-0.417139	-0.684479	-0.149799	6.09291	-3.1807	0.00329894	0.0591354	-2.72535
ENSMUSG00000038762	Abcf1	0.322999	0.11026	0.535738	5.23529	3.05957	0.00376032	0.0651591	-2.72889
ENSMUSG00000028059	Arhgef2	0.323577	0.11127	0.535885	5.33964	3.07129	0.00364109	0.0638053	-2.72899
ENSMUSG00000074698	Csnk2a1	0.275049	0.0993241	0.450774	6.61867	3.15416	0.00289396	0.0541356	-2.73174
ENSMUSG00000027889	Ampd2	-0.534469	-0.904131	-0.164808	3.6911	-2.91357	0.00558829	0.0815235	-2.74008
ENSMUSG00000030409	Dmpk	-0.731511	-1.26162	-0.201406	2.38987	-2.78078	0.00794159	0.101869	-2.74186
ENSMUSG00000054428	Atpif1	-0.221016	-0.358291	-0.0837406	9.2912	-3.24443	0.00224575	0.047396	-2.74552
ENSMUSG00000030094	Xpc	0.482499	0.148673	0.816324	3.83039	2.91262	0.00560253	0.0815235	-2.7458
ENSMUSG00000063019	Manbal	0.354089	0.118113	0.590066	4.94344	3.02379	0.00414761	0.0695517	-2.74654
ENSMUSG00000038374	Rbm8a	0.24814	0.0891888	0.407091	6.61334	3.14587	0.00296163	0.0548819	-2.7477
ENSMUSG00000041477	Dcp1b	0.578899	0.169128	0.988669	3.16214	2.84688	0.00667423	0.0905514	-2.7671
ENSMUSG00000034297	Med13	0.281033	0.0969254	0.46514	5.65089	3.07605	0.00359368	0.0632706	-2.77798
ENSMUSG00000025575	Cant1	0.403331	0.126571	0.68009	4.17295	2.93675	0.00525121	0.0789571	-2.78114
ENSMUSG00000036501	Fam13b	0.388067	0.126948	0.649186	4.69671	2.99485	0.00448778	0.0724608	-2.78784
ENSMUSG00000025374	Nabp2	0.359802	0.116383	0.603222	4.62258	2.97863	0.00468976	0.0741477	-2.79345
ENSMUSG00000030232	Aebp2	0.338256	0.115257	0.561254	5.46745	3.05669	0.00379023	0.0654477	-2.80268
ENSMUSG00000021282	Eif5	0.218651	0.0807551	0.356547	8.3613	3.19527	0.00257947	0.050891	-2.80585
ENSMUSG00000028057	Rit1	0.380576	0.123516	0.637636	4.73446	2.98342	0.00462918	0.073869	-2.81108
ENSMUSG00000017615	Tnfaip1	0.260672	0.0925946	0.428748	6.71508	3.12531	0.00313594	0.0569139	-2.81963
ENSMUSG00000027363	Usp8	0.353403	0.118813	0.587994	5.37054	3.03576	0.00401404	0.0676657	-2.82217
ENSMUSG00000047423	RP23-140G16.1	0.368379	0.123793	0.612965	5.45664	3.03509	0.00402144	0.0676657	-2.82274
ENSMUSG00000036580	Spg20	0.351332	0.115763	0.586902	5.00421	3.00544	0.0043604	0.0713041	-2.82573
ENSMUSG00000014867	Surf4	0.395134	0.129396	0.660871	5.0216	2.99639	0.004469	0.0724608	-2.83073
ENSMUSG00000004788	Eif2b2	0.367826	0.118964	0.616689	4.80717	2.97846	0.00469194	0.0741477	-2.8367
ENSMUSG00000039607	Rbms3	0.356995	0.115605	0.598386	4.92142	2.98023	0.00466944	0.0741477	-2.85368
ENSMUSG00000038805	Six3	0.746397	0.2585	1.2343	5.74115	3.21569	0.00482774	0.0755683	-2.854
ENSMUSG00000007589	Tinf2	0.503342	0.144163	0.862522	3.29198	2.82397	0.00709063	0.0944081	-2.86093
ENSMUSG00000026986	Hnmt	-0.478996	-0.808954	-0.149037	4.34313	-2.92762	0.00544174	0.0803519	-2.86753
ENSMUSG00000026096	Osgepl1	0.465364	0.136579	0.794148	3.74093	2.85225	0.00658001	0.089519	-2.87282
ENSMUSG00000025980	Hspd1	0.29777	0.10222	0.493319	6.12766	3.06854	0.00366877	0.064022	-2.87391
ENSMUSG00000022204	Ngdn	0.367684	0.114317	0.621051	4.43057	2.92437	0.00542882	0.0803519	-2.87514
ENSMUSG00000033595	Lgi3	0.378198	0.115509	0.640888	4.19448	2.90125	0.00577573	0.0824377	-2.88464
ENSMUSG00000040462	Os9	0.293493	0.097134	0.489853	5.42426	3.01199	0.00428321	0.0707446	-2.88719
ENSMUSG00000033174	Mgll	-0.215752	-0.351564	-0.079941	9.67136	-3.20131	0.00253611	0.0506044	-2.88896
ENSMUSG00000029790	Cep41	0.574971	0.155372	0.99457	2.9457	2.76134	0.00835474	0.104281	-2.89211
ENSMUSG00000038156	Spon1	0.396716	0.125807	0.667625	4.83059	2.95096	0.00505395	0.0774207	-2.89466
ENSMUSG00000030067	Foxp1	0.259979	0.0944213	0.425537	8.48119	3.16688	0.00283313	0.0535045	-2.90324
ENSMUSG00000042312	S100a13	-0.308666	-0.515071	-0.10226	5.46747	-3.01352	0.00426547	0.0705695	-2.90452
ENSMUSG00000008892	Vdac3	0.295832	0.0983551	0.493308	5.60166	3.01882	0.00420427	0.0701212	-2.90605
ENSMUSG00000036790	Slitrk2	0.413742	0.126946	0.700539	4.35101	2.90712	0.00568563	0.0821048	-2.90737
ENSMUSG00000038332	Sesn1	-0.480724	-0.817207	-0.14424	4.00392	-2.87899	0.00612906	0.0853833	-2.90969
ENSMUSG00000028221	Tmem55a	0.363673	0.114121	0.613225	4.65912	2.93669	0.00525208	0.0789571	-2.90985
ENSMUSG00000001700	Gramd3	0.331885	0.108899	0.554871	5.40943	2.99928	0.00443405	0.0720941	-2.91321
ENSMUSG00000064246	Chil1	-0.514859	-0.8836	-0.146117	3.53896	-2.81367	0.00728543	0.0959442	-2.91828
ENSMUSG00000071226	Cecr2	0.544961	0.153247	0.936675	3.3091	2.80352	0.00748229	0.098014	-2.92361
ENSMUSG00000043207	Zmpste24	0.430322	0.132028	0.728615	4.41853	2.90708	0.00568634	0.0821048	-2.92723
ENSMUSG00000032300	RP23-437A9.3	0.660994	0.180824	1.14116	3.15667	2.77771	0.00813547	0.102714	-2.92866
ENSMUSG00000027435	Cd93	0.616807	0.159364	1.07425	2.69696	2.71719	0.00936764	0.111448	-2.92883
ENSMUSG00000019471	Cdc37	0.261215	0.089425	0.433004	6.42365	3.06414	0.00371344	0.0645734	-2.92965
ENSMUSG00000021680	Crhbp	-0.655338	-1.14185	-0.168821	2.5816	-2.71441	0.0094352	0.111448	-2.94068
ENSMUSG00000045062	Pcdhb7	0.6471	0.166947	1.12725	2.6889	2.71581	0.00940117	0.111448	-2.94558
ENSMUSG00000035773	Kiss1r	0.584605	0.157115	1.0121	3.06953	2.75578	0.0084764	0.105178	-2.94854
ENSMUSG00000034602	Mon2	0.286919	0.0941239	0.479714	5.58484	2.99896	0.00443791	0.0720941	-2.95789
ENSMUSG00000027797	Dclk1	-0.211939	-0.347249	-0.0766301	8.99028	-3.1564	0.00287596	0.0539234	-2.95817
ENSMUSG00000071014	Ndufb6	-0.297269	-0.488816	-0.105722	7.88544	-3.14215	0.00325262	0.0584112	-2.95844
ENSMUSG00000035885	Cox8a	-0.253165	-0.413496	-0.0928339	9.87018	-3.19366	0.00277558	0.0531287	-2.96873
ENSMUSG00000043384	Gprasp1	0.338344	0.117172	0.559515	7.04032	3.10407	0.00373626	0.0648559	-2.96897
ENSMUSG00000047261	Gap43	0.223259	0.0804775	0.366041	8.96854	3.15097	0.00291982	0.0543109	-2.96914
ENSMUSG00000024927	Rela	0.433526	0.125044	0.742008	3.86204	2.832	0.00694206	0.0930349	-2.96943
ENSMUSG00000047264	Zfp358	0.377661	0.113728	0.641593	4.39858	2.88347	0.00605628	0.0846081	-2.97201
ENSMUSG00000026452	Syt2	0.639902	0.164604	1.1152	2.89859	2.71303	0.00946868	0.111448	-2.976
ENSMUSG00000026049	Tex30	-0.591708	-1.02407	-0.159349	3.1516	-2.75785	0.00843087	0.104876	-2.97729
ENSMUSG00000048310	Pskh1	0.610194	0.162866	1.05752	3.06132	2.74884	0.00863064	0.106556	-2.97744
ENSMUSG00000021555	Naa35	0.283162	0.0934319	0.472893	5.88146	3.0075	0.00433594	0.0710217	-2.9775
ENSMUSG00000022451	Twf1	0.359754	0.11677	0.602739	5.44669	2.98374	0.00462943	0.073869	-2.98003
ENSMUSG00000046671	Mtfr1l	0.276521	0.0919055	0.461136	5.96926	3.01834	0.00420976	0.0701212	-2.98231
ENSMUSG00000035093	Secisbp2l	0.250861	0.086743	0.414979	7.05391	3.08024	0.00355242	0.0629932	-2.98308
ENSMUSG00000019837	Gtf3c6	0.296907	0.0984298	0.495385	6.03221	3.01451	0.0042539	0.0704962	-2.98651
ENSMUSG00000049044	Rapgef4	-0.992387	-1.61761	-0.367164	8.95547	-3.34441	0.00376962	0.0652059	-2.99176
ENSMUSG00000037474	Dtl	-0.631734	-1.09869	-0.164782	2.97882	-2.72628	0.00915036	0.11004	-3.00296
ENSMUSG00000037060	Prkcdbp	0.305041	0.0974766	0.512605	5.35245	2.96151	0.00491212	0.0764039	-3.00445
ENSMUSG00000026848	Tor1b	0.373593	0.113286	0.633899	4.77057	2.89215	0.00591773	0.0834947	-3.0047
ENSMUSG00000020932	Gfap	0.683543	0.231688	1.1354	6.14046	3.18	0.00522491	0.0789571	-3.00486
ENSMUSG00000027371	Fahd2a	-0.512069	-0.891272	-0.132866	2.94076	-2.72123	0.0092706	0.11072	-3.00723
ENSMUSG00000038462	Uqcrfs1	-0.254244	-0.422283	-0.0862053	6.73287	-3.04894	0.00387169	0.0659322	-3.02158
ENSMUSG00000064341	mt-Nd1	-0.150902	-0.243845	-0.057959	15.2083	-3.2718	0.00207818	0.0451125	-3.02244
ENSMUSG00000036371	Serbp1	0.211591	0.0753903	0.347791	9.00936	3.13059	0.00309031	0.0564197	-3.02648
ENSMUSG00000028906	Epb41	0.334901	0.103415	0.566388	4.946	2.9154	0.00556098	0.0814923	-3.02837
ENSMUSG00000048701	Ccdc6	0.414936	0.120589	0.709284	4.10611	2.84072	0.00678389	0.0915361	-3.03095
ENSMUSG00000009907	Vps4b	0.328213	0.104073	0.552353	5.40795	2.95083	0.00505582	0.0774207	-3.03214
ENSMUSG00000027875	Hmgcs2	-0.657936	-1.15043	-0.165445	2.80979	-2.69211	0.00999244	0.11584	-3.03593
ENSMUSG00000021185	RP23-359F12.1	0.70978	0.174112	1.24545	2.60828	2.67015	0.0105709	0.120425	-3.03633
ENSMUSG00000077450	Rab11b	0.23339	0.0794578	0.387321	7.01856	3.05535	0.00380419	0.06546	-3.03686
ENSMUSG00000027067	Ssrp1	0.342168	0.110039	0.574297	5.64436	2.97042	0.00479525	0.0752323	-3.03746
ENSMUSG00000025237	Parp6	-0.277295	-0.462505	-0.0920853	6.25142	-3.01707	0.0042243	0.0702414	-3.04089
ENSMUSG00000047712	Ust	0.587913	0.15459	1.02124	3.31104	2.73406	0.00896781	0.108948	-3.04159
ENSMUSG00000047371	Zfp768	0.484834	0.135759	0.83391	4.0053	2.79886	0.00757436	0.0990887	-3.04732
ENSMUSG00000036099	Vezt	-0.32508	-0.549399	-0.10076	5.06036	-2.92032	0.00548816	0.0807848	-3.05382
ENSMUSG00000012535	Tnpo3	0.267646	0.0865688	0.448723	5.87483	2.97855	0.00469078	0.0741477	-3.0567
ENSMUSG00000024188	Luc7l	0.263845	0.0871725	0.440517	6.29065	3.00945	0.00431297	0.0708612	-3.05712
ENSMUSG00000050608	Minos1	-0.30708	-0.509445	-0.104715	7.12967	-3.06915	0.00389157	0.0661567	-3.05884
ENSMUSG00000020526	Znhit3	-0.34344	-0.579383	-0.107498	5.32996	-2.93328	0.00530041	0.0793214	-3.06192
ENSMUSG00000095325	Zfp870	0.543743	0.137962	0.949525	3.00022	2.70029	0.0097847	0.113966	-3.0659
ENSMUSG00000026192	Atic	0.411423	0.119847	0.702998	4.36469	2.84345	0.00673522	0.0912534	-3.0669
ENSMUSG00000026245	Farsb	0.3566	0.11155	0.60165	5.40534	2.93248	0.00531188	0.0793728	-3.0677
ENSMUSG00000020460	Rps27a	-0.222004	-0.36497	-0.0790379	9.52846	-3.12922	0.00310211	0.0565304	-3.06868
ENSMUSG00000070319	Eif3g	0.294551	0.0940853	0.495016	5.70948	2.96093	0.0049198	0.0764039	-3.07531
ENSMUSG00000021182	Ccdc88c	0.447012	0.123959	0.770065	3.91353	2.78839	0.00778505	0.100645	-3.07662
ENSMUSG00000020599	Rgs9	0.467463	0.138902	0.796023	4.67413	2.87763	0.00646301	0.0884144	-3.07898
ENSMUSG00000022562	Oplah	0.396248	0.112785	0.67971	4.20725	2.81695	0.00722288	0.0954268	-3.08349
ENSMUSG00000031403	Dkc1	0.329397	0.104398	0.554395	5.72947	2.95018	0.00506472	0.0774369	-3.08883
ENSMUSG00000044933	Sstr3	-0.496106	-0.860995	-0.131217	3.47207	-2.73982	0.00883514	0.108048	-3.08948
ENSMUSG00000041078	Grid1	0.396014	0.121594	0.670435	5.13341	2.91189	0.00571908	0.0822232	-3.0911
ENSMUSG00000016541	Atxn10	0.230367	0.0781423	0.382591	7.4045	3.0496	0.00386467	0.0659264	-3.09836
ENSMUSG00000038425	Poli	0.527073	0.135561	0.918585	3.27606	2.7129	0.00947205	0.111448	-3.09942
ENSMUSG00000021180	Rps6ka5	0.419549	0.120154	0.718944	4.34636	2.82388	0.00709231	0.0944081	-3.09958
ENSMUSG00000030701	Plekhb1	-0.210887	-0.348196	-0.0735774	8.79751	-3.09498	0.00341085	0.0607206	-3.10199
ENSMUSG00000017778	Cox7c	-0.408897	-0.670779	-0.147015	9.25944	-3.25297	0.00391081	0.0663695	-3.10221
ENSMUSG00000029623	Pdap1	0.234062	0.079408	0.388716	7.50325	3.04984	0.00386213	0.0659264	-3.10232
ENSMUSG00000018287	Spag7	0.27532	0.0890945	0.461545	6.20799	2.97925	0.00468193	0.0741477	-3.1039
ENSMUSG00000045624	Esf1	0.303291	0.0934051	0.513177	5.32538	2.91195	0.00561263	0.0815235	-3.10462
ENSMUSG00000031596	Slc7a2	0.41032	0.122436	0.698205	4.82683	2.87309	0.00625267	0.08653	-3.10798
ENSMUSG00000030397	Mark4	0.296469	0.0932565	0.499682	5.64658	2.93993	0.00520652	0.0789403	-3.10948
ENSMUSG00000068290	Ddrgk1	0.269589	0.0858913	0.453287	5.82302	2.95737	0.00496732	0.0765402	-3.11118
ENSMUSG00000030168	Adipor2	0.33355	0.104793	0.562307	5.61181	2.93829	0.00522954	0.0789571	-3.11496
ENSMUSG00000023044	Csad	0.331957	0.100933	0.56298	5.15986	2.89556	0.00586414	0.0829801	-3.1199
ENSMUSG00000045435	Tmem60	-0.434198	-0.737357	-0.131038	4.9071	-2.89884	0.00617305	0.0858749	-3.12078
ENSMUSG00000030087	Klf15	0.448923	0.121674	0.776172	3.78086	2.7644	0.00828831	0.10402	-3.13098
ENSMUSG00000026473	Glul	-0.180166	-0.295143	-0.0651884	11.6874	-3.15768	0.00286572	0.0539137	-3.13318
ENSMUSG00000025931	Paqr8	-0.269075	-0.447379	-0.0907698	7.53912	-3.04191	0.00396622	0.0670794	-3.13533
ENSMUSG00000060803	Gstp1	-0.773133	-1.36009	-0.186181	2.69009	-2.6752	0.0113293	0.12573	-3.13974
ENSMUSG00000026219	Trip12	0.262807	0.0859617	0.439652	6.63482	2.99468	0.00448983	0.0724608	-3.14074
ENSMUSG00000003581	Rnf215	0.502836	0.128128	0.877544	3.53047	2.70422	0.00968625	0.113489	-3.14674
ENSMUSG00000039530	Tusc3	-0.323084	-0.540936	-0.105232	6.55517	-2.99819	0.00467248	0.0741477	-3.15371
ENSMUSG00000026317	Cln8	0.542299	0.138571	0.946027	3.44274	2.70681	0.00962182	0.112908	-3.16176
ENSMUSG00000020109	Dnajb12	0.418091	0.113748	0.722435	4.03886	2.76831	0.00820433	0.103097	-3.16178
ENSMUSG00000022191	Drosha	0.324651	0.0984052	0.550898	5.3462	2.89164	0.00592587	0.0834947	-3.16428
ENSMUSG00000026872	Zeb2	-0.23361	-0.389698	-0.0775214	7.22057	-3.01598	0.00423695	0.0703334	-3.16472
ENSMUSG00000027893	Ahcyl1	-0.229985	-0.380982	-0.0789883	8.7541	-3.0693	0.00366109	0.064001	-3.168
ENSMUSG00000029166	Mapre3	0.334653	0.103122	0.566184	5.63772	2.91268	0.0056017	0.0815235	-3.17019
ENSMUSG00000033099	Nol12	0.429061	0.114578	0.743544	3.83418	2.74935	0.00861936	0.106556	-3.17504
ENSMUSG00000062006	Rpl34	-0.249137	-0.411756	-0.0865179	9.4151	-3.09627	0.00357145	0.063023	-3.17753
ENSMUSG00000024960	Plcb3	0.620293	0.13856	1.10203	2.56046	2.59477	0.0127983	0.135632	-3.18395
ENSMUSG00000020326	Ccng1	0.271919	0.0861251	0.457712	6.10056	2.94928	0.00507695	0.077504	-3.1843
ENSMUSG00000022899	Slc15a2	-0.390742	-0.669821	-0.111662	4.63867	-2.82143	0.00713822	0.0946485	-3.19032
ENSMUSG00000070697	Utp3	0.345958	0.102858	0.589058	5.24927	2.86778	0.00631454	0.0868646	-3.19189
ENSMUSG00000030878	Cdr2	-0.439995	-0.764215	-0.115775	3.80401	-2.73474	0.00895214	0.108948	-3.19212
ENSMUSG00000032349	Elovl5	0.284616	0.0900078	0.479223	6.30489	2.94718	0.00510583	0.0777046	-3.20495
ENSMUSG00000032381	Fam96a	-0.304018	-0.514894	-0.093142	5.6763	-2.90522	0.0057146	0.0822232	-3.21327
ENSMUSG00000028525	Pde4b	0.251911	0.0832259	0.420597	7.55378	3.00938	0.00431378	0.0708612	-3.21416
ENSMUSG00000047996	Prrg1	-0.631047	-1.12434	-0.137753	2.52941	-2.57789	0.0133526	0.139559	-3.22749
ENSMUSG00000027630	Tbl1xr1	0.307956	0.0959221	0.519989	6.12824	2.92679	0.00539369	0.0801105	-3.23322
ENSMUSG00000028394	Pole3	0.29756	0.0887181	0.506402	5.42684	2.87121	0.00625722	0.08653	-3.23476
ENSMUSG00000028514	Usp24	0.360381	0.102921	0.617841	4.83156	2.82072	0.00715158	0.0946866	-3.2355
ENSMUSG00000068154	Insm1	-0.600174	-1.06215	-0.1382	2.81916	-2.61798	0.0120702	0.131008	-3.23624
ENSMUSG00000031059	Ndufb11	-0.22479	-0.375336	-0.0742435	7.73648	-3.00894	0.00431897	0.0708612	-3.2364
ENSMUSG00000021843	Ktn1	0.235978	0.0769471	0.395008	7.36962	2.99018	0.00454504	0.072994	-3.24107
ENSMUSG00000001323	Srr	0.293223	0.0905789	0.495867	6.02242	2.91589	0.00555367	0.0814923	-3.24166
ENSMUSG00000021947	Cryl1	0.584195	0.131447	1.03694	2.84953	2.60021	0.012624	0.134506	-3.2419
ENSMUSG00000060636	Rpl35a	-0.456285	-0.757455	-0.155116	8.22858	-3.16724	0.00499197	0.0768002	-3.24282
ENSMUSG00000030226	Lmo3	0.290093	0.0904895	0.489696	6.27949	2.92871	0.00536587	0.0799497	-3.25003
ENSMUSG00000040560	Wdr7	0.290672	0.088951	0.492392	5.99729	2.90376	0.0057371	0.0823624	-3.25534
ENSMUSG00000045598	Zfp553	0.433556	0.113836	0.753276	4.11015	2.73265	0.00900079	0.109215	-3.26011
ENSMUSG00000031785	Adgrg1	0.391131	0.10561	0.676653	4.4621	2.76052	0.00837246	0.104281	-3.26158
ENSMUSG00000053279	Aldh1a1	0.274215	0.0862357	0.462194	6.41507	2.93961	0.005211	0.0789403	-3.26208
ENSMUSG00000001039	B9d1	0.581204	0.133636	1.02877	2.9428	2.61684	0.0121051	0.131242	-3.26267
ENSMUSG00000044216	Kcnj4	0.307834	0.0949234	0.520745	6.19663	2.91358	0.00558819	0.0815235	-3.2642
ENSMUSG00000031285	Dcx	-0.493254	-0.847384	-0.139123	4.7368	-2.8372	0.0078349	0.100893	-3.26642
ENSMUSG00000073481	2023-03-02	0.311872	0.0936666	0.530078	5.62404	2.88017	0.00610977	0.0852348	-3.26682
ENSMUSG00000028161	Ppp3ca	0.198987	0.0695331	0.328441	11.283	3.09754	0.00338676	0.0604901	-3.26791
ENSMUSG00000020388	Pdlim4	0.375553	0.106747	0.644359	4.89995	2.8154	0.00725238	0.0956365	-3.26845
ENSMUSG00000049148	Plcxd3	0.354774	0.097158	0.61239	4.54731	2.77515	0.00805917	0.102314	-3.2689
ENSMUSG00000016427	Ndufa1	-0.440223	-0.733859	-0.146587	7.78352	-3.12173	0.00524688	0.0789571	-3.27109
ENSMUSG00000021377	Dek	0.267695	0.0834642	0.451926	6.45991	2.9281	0.00537477	0.0799497	-3.27388
ENSMUSG00000051705	Senp8	-0.61332	-1.09	-0.13664	2.87465	-2.59279	0.012862	0.136015	-3.27479
ENSMUSG00000063882	Uqcrh	-0.224125	-0.372107	-0.0761437	9.63937	-3.05204	0.00383888	0.0658274	-3.27492
ENSMUSG00000027668	Mfn1	0.306135	0.0904679	0.521803	5.47852	2.86046	0.00643832	0.0881987	-3.27827
ENSMUSG00000039361	Picalm	0.229706	0.0716249	0.387786	6.53405	2.9282	0.00537332	0.0799497	-3.28957
ENSMUSG00000046574	Prr12	0.332232	0.0942308	0.570233	5.10257	2.813	0.00729827	0.0959854	-3.29076
ENSMUSG00000011382	Dhdh	0.389514	0.105312	0.673715	4.4696	2.76188	0.00834299	0.104281	-3.29844
òÇg}ENSMUSG00000028909	Ptpru	0.465644	0.107866	0.823421	3.30697	2.6227	0.011927	0.129882	-3.29872
ENSMUSG00000027475	Kif3b	0.288886	0.085844	0.491928	5.7595	2.86714	0.00632531	0.0868916	-3.30044
ENSMUSG00000027447	Cst3	-0.482698	-0.794643	-0.170753	10.9096	-3.25807	0.00450313	0.0725258	-3.30127
ENSMUSG00000024319	Vps52	0.305448	0.0854496	0.525446	4.92259	2.79786	0.00759435	0.0992187	-3.30178
ENSMUSG00000026600	Soat1	0.381239	0.108009	0.654468	5.0544	2.81303	0.00733976	0.0964027	-3.30688
ENSMUSG00000032737	Inppl1	0.298879	0.0874573	0.510301	5.45139	2.84874	0.00664145	0.0902306	-3.30718
ENSMUSG00000051427	Ccdc157	0.505959	0.12505	0.886868	3.58467	2.67672	0.0103948	0.119071	-3.3094
ENSMUSG00000015023	Ddx19a	0.387727	0.101697	0.673756	4.29053	2.73164	0.00902439	0.109367	-3.31232
ENSMUSG00000001151	Pcnt	0.345638	0.0988598	0.592417	5.17853	2.82242	0.00711953	0.0946428	-3.31451
ENSMUSG00000032418	Me1	0.307482	0.0919938	0.52297	5.8151	2.87544	0.00618725	0.0859515	-3.31648
ENSMUSG00000041915	Ammecr1l	0.338029	0.0929796	0.583079	4.80066	2.77976	0.00796267	0.101875	-3.31944
ENSMUSG00000030098	Grip2	-0.700394	-1.25372	-0.147063	2.6746	-2.55376	0.0143398	0.145266	-3.32101
ENSMUSG00000038623	Tm6sf1	-0.525572	-0.92683	-0.124314	3.47826	-2.63947	0.0114306	0.126569	-3.32481
ENSMUSG00000025156	Gps1	-0.70624	-1.27222	-0.140263	2.2232	-2.51456	0.0156333	0.151991	-3.32879
ENSMUSG00000043131	Mob1a	0.338176	0.0936014	0.582751	4.86325	2.78637	0.00782628	0.100893	-3.32987
ENSMUSG00000051910	Sox6	0.289569	0.0855998	0.493538	5.76795	2.86085	0.00643173	0.0881987	-3.33201
ENSMUSG00000020774	Aspa	-0.459751	-0.800837	-0.118664	4.18677	-2.71767	0.00941284	0.111448	-3.33497
ENSMUSG00000016257	Prelid3b	0.275765	0.0839184	0.467612	6.34439	2.89663	0.00584744	0.0829801	-3.33861
ENSMUSG00000037736	Limch1	0.246464	0.0777664	0.415162	7.17381	2.9441	0.00514836	0.0782313	-3.34376
ENSMUSG00000024378	Stard4	-0.386699	-0.670983	-0.102414	4.5301	-2.74112	0.00880542	0.107905	-3.34391
ENSMUSG00000073888	Ccl27a	-0.392459	-0.669703	-0.115215	5.65595	-2.87612	0.00688282	0.0923663	-3.34453
ENSMUSG00000036887	C1qa	0.409362	0.108492	0.710232	4.5355	2.7418	0.00878974	0.107846	-3.34626
ENSMUSG00000041774	Ydjc	-0.452488	-0.796235	-0.108741	3.77351	-2.65263	0.0110542	0.12393	-3.34695
ENSMUSG00000008668	Rps18	-0.243786	-0.408207	-0.0793653	8.47227	-2.98921	0.00458896	0.0734682	-3.35304
ENSMUSG00000007836	Hnrnpa0	0.27188	0.0851739	0.458587	7.07989	2.93462	0.00528594	0.0792505	-3.35487
ENSMUSG00000026005	Rpe	0.407976	0.103689	0.712263	4.15924	2.70184	0.00974572	0.113781	-3.35863
ENSMUSG00000032481	Smarcc1	0.269244	0.0818698	0.456617	6.53416	2.89564	0.00586291	0.0829801	-3.36642
ENSMUSG00000041560	Gltscr2	0.232303	0.0721439	0.392463	7.01756	2.92288	0.00545062	0.0803519	-3.3758
ENSMUSG00000027799	Nbea	0.213655	0.0686971	0.358613	8.28061	2.97015	0.00479866	0.0752323	-3.37932
ENSMUSG00000031337	Mtm1	0.561712	0.110842	1.01258	2.53703	2.51056	0.0157885	0.151991	-3.38097
ENSMUSG00000019853	Hebp2	0.597485	0.123051	1.07192	2.82729	2.53781	0.0147576	0.148172	-3.38149
ENSMUSG00000049907	Rasl11b	-0.32357	-0.551964	-0.0951766	5.97541	-2.85737	0.00656626	0.089455	-3.38223
ENSMUSG00000026032	Ndufb3	-0.250402	-0.421379	-0.0794253	7.74848	-2.95127	0.00504985	0.0774207	-3.38232
ENSMUSG00000031479	Vps36	0.313735	0.0855335	0.541936	4.97811	2.77046	0.00815836	0.102714	-3.38287
ENSMUSG00000007039	Ddah2	-0.39113	-0.680585	-0.101675	4.55992	-2.723	0.0092281	0.110346	-3.38453
ENSMUSG00000058558	Rpl5	-0.261254	-0.438972	-0.0835371	8.06176	-2.9681	0.00496652	0.0765402	-3.38553
ENSMUSG00000026439	Rbbp5	0.34586	0.0934453	0.598275	4.82053	2.76117	0.00835832	0.104281	-3.38623
ENSMUSG00000031781	Ciapin1	0.381308	0.0974192	0.665197	4.35018	2.70667	0.00962525	0.112908	-3.388
ENSMUSG00000020859	Spag9	-0.205945	-0.346716	-0.0651737	7.77545	-2.94812	0.00509288	0.0776271	-3.38921
ENSMUSG00000046330	Rpl37a	-0.212544	-0.355152	-0.069936	9.53127	-3.0034	0.0043847	0.0715829	-3.39274
ENSMUSG00000029570	Lfng	0.515034	0.106806	0.923262	2.9917	2.54238	0.0145906	0.147053	-3.39384
ENSMUSG00000049555	Tmie	0.361415	0.0895809	0.63325	4.14315	2.67923	0.0103281	0.118894	-3.39766
ENSMUSG00000003316	Glg1	0.263165	0.0818783	0.444452	7.28176	2.92529	0.00541538	0.0803118	-3.39777
ENSMUSG00000042535	Gtpbp1	0.297461	0.0846517	0.51027	5.66799	2.81674	0.00722682	0.0954268	-3.40472
ENSMUSG00000041261	Car8	0.308201	0.0892503	0.527151	5.77949	2.83658	0.00685849	0.092165	-3.40832
ENSMUSG00000030744	Rps3	-0.270424	-0.452375	-0.088473	9.21808	-3.02063	0.00476876	0.0750562	-3.40848
ENSMUSG00000024841	Eif1ad	0.427304	0.105753	0.748855	4.14291	2.67791	0.0103632	0.119071	-3.40939
ENSMUSG00000025766	D3Ertd751e	-0.374202	-0.650414	-0.0979899	4.65185	-2.73005	0.00906141	0.109413	-3.41202
ENSMUSG00000034271	Jdp2	0.359406	0.0954817	0.62333	4.94858	2.74419	0.00873556	0.107449	-3.4168
ENSMUSG00000058756	Thra	0.185005	0.062119	0.307891	11.0694	3.03381	0.00403547	0.0677864	-3.41766
ENSMUSG00000032228	Tcf12	0.30104	0.0888252	0.513255	6.1773	2.85879	0.00647217	0.0884172	-3.41795
ENSMUSG00000027011	Ube2e3	0.253304	0.0776854	0.428922	7.08206	2.90656	0.00569422	0.0821048	-3.42136
ENSMUSG00000048022	Tmem229a	-0.235599	-0.398687	-0.0725115	7.1854	-2.91112	0.00562515	0.0815853	-3.42457
ENSMUSG00000024991	Eif3a	0.23787	0.0724548	0.403286	7.02735	2.89782	0.0058288	0.0829801	-3.43511
ENSMUSG00000039615	Stub1	0.227886	0.068655	0.387116	6.8066	2.88402	0.00604749	0.0846048	-3.43739
ENSMUSG00000003134	Tbc1d8	0.45496	0.106477	0.803442	3.85736	2.63087	0.0116826	0.128211	-3.439
ENSMUSG00000027425	Csrp2bp	0.62732	0.12348	1.13116	2.80307	2.50902	0.0158487	0.152254	-3.43992
ENSMUSG00000029470	P2rx4	-0.523002	-0.94551	-0.100494	2.69907	-2.49446	0.016428	0.155123	-3.44515
ENSMUSG00000050530	Fam171a1	0.295415	0.0869578	0.503873	6.37053	2.85622	0.00652491	0.0890146	-3.44732
ENSMUSG00000029810	Tmem176b	0.34704	0.0916005	0.60248	4.89574	2.73778	0.00888182	0.108437	-3.44743
ENSMUSG00000022742	Cpox	-0.334806	-0.577602	-0.0920094	5.35199	-2.77881	0.00798259	0.101978	-3.4571
ENSMUSG00000070348	Ccnd1	0.322945	0.0977544	0.548136	6.91585	2.91462	0.00626394	0.08653	-3.45789
ENSMUSG00000031843	Mphosph6	0.388846	0.0958523	0.68184	4.42493	2.6744	0.0104565	0.119535	-3.46021
ENSMUSG00000021990	Spata13	0.557658	0.117718	0.997598	3.18878	2.55436	0.0141617	0.144201	-3.46153
ENSMUSG00000094724	Rnaset2b	0.456946	0.102513	0.811379	3.72038	2.598	0.0126946	0.134968	-3.46657
ENSMUSG00000063239	Grm4	0.424905	0.104518	0.745291	4.40489	2.67254	0.0105063	0.119959	-3.47025
ENSMUSG00000022443	Myh9	0.366297	0.0976758	0.634918	5.12975	2.74872	0.00866376	0.106831	-3.47104
ENSMUSG00000063446	Plppr1	0.58641	0.113701	1.05912	2.97868	2.49986	0.016211	0.153933	-3.47555
ENSMUSG00000023886	Smoc2	-0.542536	-0.980426	-0.104646	2.84917	-2.49673	0.0163363	0.154554	-3.47574
ENSMUSG00000024558	Mapk4	0.338962	0.0874728	0.590451	4.74941	2.71606	0.00939503	0.111448	-3.47652
ENSMUSG00000071528	Usmg5	-0.595042	-0.994209	-0.195874	9.73883	-3.14078	0.00585837	0.0829801	-3.4781
ENSMUSG00000030980	Knop1	0.31649	0.0832539	0.549727	5.02775	2.73446	0.00895862	0.108948	-3.48034
ENSMUSG00000033543	Gtf2a2	-0.310303	-0.534537	-0.0860684	5.60486	-2.78863	0.00778012	0.100645	-3.48149
ENSMUSG00000029106	Add1	0.213118	0.0661875	0.360048	8.09133	2.92291	0.00545008	0.0803519	-3.48426
ENSMUSG00000067786	Nnat	-0.288281	-0.485744	-0.0908178	8.59462	-2.97264	0.00554057	0.0814348	-3.49099
ENSMUSG00000021929	Kpna3	0.293382	0.0818551	0.50491	5.77461	2.79496	0.00765229	0.0994496	-3.49151
ENSMUSG00000030421	Uri1	0.236808	0.0704594	0.403157	6.87098	2.8687	0.00629913	0.0868646	-3.49215
ENSMUSG00000020716	Nf1	0.293168	0.081227	0.505109	5.69727	2.78746	0.00780394	0.100757	-3.49347
ENSMUSG00000055447	Cd47	0.272479	0.0810498	0.463908	6.98424	2.86852	0.00630711	0.0868646	-3.49489
ENSMUSG00000031575	Ash2l	0.318003	0.0823264	0.55368	4.94675	2.71908	0.00932204	0.1112	-3.49692
ENSMUSG00000000787	Ddx3x	0.231229	0.0704143	0.392044	7.51296	2.8975	0.00583378	0.0829801	-3.49793
ENSMUSG00000040213	Ccbl2	0.487966	0.0976938	0.878238	3.17935	2.51959	0.0154398	0.15169	-3.50031
ENSMUSG00000013736	Trnt1	0.383581	0.0928585	0.674303	4.52875	2.6588	0.0108816	0.123113	-3.50296
ENSMUSG00000005417	Mprip	0.205844	0.0634041	0.348284	7.99341	2.91215	0.00560962	0.0815235	-3.50365
ENSMUSG00000020340	Cyfip2	0.201577	0.0643162	0.338837	9.51681	2.95939	0.00494032	0.0765402	-3.50419
ENSMUSG00000030663	AC160535.1	0.211548	0.0631977	0.359899	7.13027	2.87361	0.00621739	0.0862488	-3.50488
ENSMUSG00000027613	Eif6	0.328814	0.080842	0.576785	4.46569	2.67212	0.0105178	0.119959	-3.50776
ENSMUSG00000022437	Samm50	0.281495	0.0783965	0.484593	5.88396	2.793	0.00769154	0.0996973	-3.5181
ENSMUSG00000029455	Aldh2	0.29574	0.0845675	0.506912	6.41108	2.82322	0.00713913	0.0946485	-3.52117
ENSMUSG00000020463	Ppp4r3b	0.261009	0.0757508	0.446267	6.57546	2.83913	0.00681244	0.091796	-3.52336
ENSMUSG00000047216	Cdh19	-0.502973	-0.907174	-0.0987718	3.16136	-2.50758	0.0159051	0.152254	-3.52718
ENSMUSG00000042401	Crtac1	0.389668	0.0929049	0.686431	4.3739	2.64602	0.0112418	0.125322	-3.52733
ENSMUSG00000056267	Cep70	-0.379352	-0.670882	-0.0878223	4.14087	-2.62221	0.0119419	0.129901	-3.53021
ENSMUSG00000029482	Aacs	-0.560731	-1.01675	-0.104713	2.92564	-2.47788	0.017111	0.159128	-3.53166
ENSMUSG00000001786	Fbxo7	0.592238	0.118192	1.06628	3.48292	2.52243	0.0155964	0.151991	-3.53206
ENSMUSG00000072568	Fam84b	0.474923	0.0961119	0.853735	3.23508	2.52643	0.0151802	0.150235	-3.53621
ENSMUSG00000000902	Smarcb1	0.386567	0.0933576	0.679776	4.51636	2.65677	0.010938	0.123469	-3.54068
ENSMUSG00000036469	2023-03-01	0.386563	0.0938828	0.679243	4.50624	2.66155	0.0108056	0.122393	-3.54317
ENSMUSG00000036192	Rorb	0.231037	0.0697324	0.392342	7.75282	2.88631	0.00601073	0.0842099	-3.54352
ENSMUSG00000026885	Ttll11	0.333399	0.0823883	0.584411	4.74675	2.67658	0.0103985	0.119071	-3.54767
ENSMUSG00000001436	Slc19a1	0.656983	0.115667	1.1983	2.58125	2.44705	0.0185299	0.165929	-3.55038
ENSMUSG00000024292	Cyp4f14	0.529253	0.104783	0.953723	3.18304	2.5126	0.015709	0.151991	-3.55687
ENSMUSG00000021311	Mtr	0.540336	0.0958943	0.984779	2.83835	2.44995	0.0183201	0.164947	-3.55703
ENSMUSG00000029761	Cald1	0.320028	0.0836162	0.55644	5.26761	2.72789	0.00911233	0.109759	-3.55842
ENSMUSG00000035133	Arhgap5	-0.188703	-0.318301	-0.0591044	9.46771	-2.93418	0.00528765	0.0792505	-3.56312
ENSMUSG00000042182	Bend6	-0.200711	-0.340708	-0.0607135	8.06305	-2.88907	0.00596653	0.0838285	-3.56364
ENSMUSG00000026037	Orc2	0.342602	0.0826108	0.602593	4.57063	2.65545	0.0109749	0.123743	-3.56415
ENSMUSG00000027195	Hsd17b12	0.26063	0.0695955	0.451666	5.58813	2.74929	0.00862069	0.106556	-3.56451
ENSMUSG00000047866	Lonp2	0.245703	0.0677428	0.423664	6.04195	2.78224	0.00791124	0.101612	-3.56688
ENSMUSG00000033684	Qsox1	0.350033	0.0841274	0.615938	4.68907	2.65271	0.011052	0.12393	-3.56744
ENSMUSG00000046532	Ar	0.281187	0.0723123	0.490061	5.19396	2.7128	0.00947446	0.111448	-3.57521
ENSMUSG00000031563	Wwc2	0.24342	0.0708492	0.415991	7.04402	2.84247	0.00675255	0.0913629	-3.5756
ENSMUSG00000041309	Nkx6-2	0.503181	0.107295	0.899068	3.97732	2.56471	0.0139738	0.143004	-3.577
ENSMUSG00000055805	Fmnl1	0.310973	0.0789604	0.542985	5.12648	2.70096	0.00976764	0.113902	-3.57927
ENSMUSG00000019947	Arid5b	0.305177	0.0793989	0.530955	5.37815	2.72382	0.00920876	0.110346	-3.58191
ENSMUSG00000091898	Tnnc1	-0.450196	-0.810148	-0.0902433	3.35527	-2.52037	0.0154101	0.15169	-3.58237
ENSMUSG00000074513	Arfip1	0.32052	0.0806626	0.560378	5.01564	2.69283	0.00997394	0.115761	-3.58716
ENSMUSG00000000983	Wfdc18	-0.523644	-0.958668	-0.08862	2.6669	-2.42566	0.0194336	0.170315	-3.59106
ENSMUSG00000029642	Polr1d	-0.30672	-0.529264	-0.0841763	6.02647	-2.77977	0.00804661	0.102286	-3.59423
ENSMUSG00000028692	Akr1a1	0.18183	0.0555574	0.308103	8.81284	2.90178	0.00576753	0.0824377	-3.59461
ENSMUSG00000062997	Rpl35	-0.318401	-0.543388	-0.0934144	7.32259	-2.88409	0.00701002	0.0937444	-3.59567
ENSMUSG00000041360	Pum3	0.301196	0.0759082	0.526484	5.12682	2.69413	0.00994068	0.115511	-3.60036
ENSMUSG00000063362	Alg11	0.31296	0.0753189	0.550602	4.78237	2.65384	0.0110201	0.123829	-3.60136
ENSMUSG00000045441	Gprin3	0.442484	0.102015	0.782953	4.4977	2.62485	0.0121345	0.131274	-3.60387
ENSMUSG00000030495	Slc7a10	-0.531742	-0.962451	-0.101033	3.21436	-2.48785	0.0166971	0.156821	-3.6082
ENSMUSG00000022175	Lrp10	0.542099	0.0909735	0.993224	2.78435	2.42153	0.0196293	0.171542	-3.61014
ENSMUSG00000033102	Cdc14b	0.387093	0.084231	0.689954	4.07721	2.5756	0.0134293	0.140213	-3.61097
ENSMUSG00000024712	Rfk	0.230164	0.0642814	0.396047	6.5361	2.79604	0.00763054	0.0994285	-3.61672
ENSMUSG00000025911	Adhfe1	0.377011	0.0878388	0.666184	4.4527	2.62727	0.0117897	0.12891	-3.62601
ENSMUSG00000060244	Alyref2	0.612812	0.0971886	1.12844	2.65996	2.39498	0.0209277	0.17755	-3.62676
ENSMUSG00000026154	Sdhaf4	-0.279251	-0.480461	-0.0780412	6.53456	-2.79758	0.00762815	0.0994285	-3.62695
ENSMUSG00000027968	Larp7	0.404998	0.0867198	0.723275	4.12841	2.56421	0.0138176	0.142163	-3.63318
ENSMUSG00000078137	Ankrd63	0.398166	0.0942546	0.702078	4.79882	2.64384	0.01147	0.126864	-3.64086
ENSMUSG00000062753	RP23-189L19.6	-0.329774	-0.568191	-0.0913571	6.57449	-2.81031	0.00812907	0.102714	-3.64316
ENSMUSG00000002846	Timmdc1	0.477416	0.0944159	0.860417	3.68388	2.51192	0.0157355	0.151991	-3.64882
ENSMUSG00000096740	Lbhd1	0.459759	0.0851168	0.834401	3.35945	2.47298	0.0173175	0.159899	-3.64916
ENSMUSG00000019731	Slc35e1	0.384572	0.0767712	0.692372	3.74411	2.51777	0.0155096	0.15169	-3.65526
ENSMUSG00000028532	Cachd1	0.427638	0.0924068	0.762868	4.11954	2.57063	0.0135975	0.141277	-3.6556
ENSMUSG00000029730	Mcm7	0.438243	0.0891531	0.787332	3.79018	2.5298	0.0150542	0.149435	-3.66165
ENSMUSG00000060675	Pla2g16	-0.251732	-0.434633	-0.0688304	6.47105	-2.7735	0.00809389	0.102623	-3.66803
ENSMUSG00000020307	Cdc34	-0.308497	-0.542024	-0.0749698	5.02047	-2.66208	0.010791	0.122393	-3.66837
ENSMUSG00000033717	Adra2a	0.563161	0.096435	1.02989	3.1837	2.43152	0.0191595	0.169423	-3.66874
ENSMUSG00000028413	B4galt1	0.621049	0.0917128	1.15038	2.55998	2.3643	0.0225248	0.183259	-3.67182
ENSMUSG00000074006	Omp	-3.20821	-6.0883	-0.328116	1.56309	-2.34709	0.0310646	0.219318	-3.67266
ENSMUSG00000042116	Vwa1	0.3585	0.0770963	0.639904	4.38084	2.56724	0.0137133	0.14168	-3.67654
ENSMUSG00000019818	Cd164	0.332741	0.0809727	0.584509	5.09573	2.66326	0.0107586	0.122282	-3.67669
ENSMUSG00000021719	Rgs7bp	0.194733	0.058788	0.330678	9.42019	2.88658	0.0060063	0.0842099	-3.67955
ENSMUSG00000042185	Nfrkb	0.63187	0.095836	1.1679	2.70692	2.37543	0.0219328	0.180408	-3.6807
ENSMUSG00000064351	mt-Co1	-0.152797	-0.255668	-0.0499257	13.8848	-2.99315	0.00450854	0.0725258	-3.68148
ENSMUSG00000047721	Bola2	-0.271409	-0.468278	-0.0745398	6.61011	-2.77816	0.00799668	0.101978	-3.68257
ENSMUSG00000001576	Ergic1	0.271297	0.0722105	0.470384	6.2359	2.74606	0.0086931	0.10706	-3.68352
ENSMUSG00000002416	Ndufb2	-0.276396	-0.476949	-0.0758438	6.65375	-2.77882	0.0080382	0.102286	-3.68666
ENSMUSG00000001260	Gabrg1	-0.46623	-0.820979	-0.111481	5.0193	-2.68946	0.0118074	0.12891	-3.68847
ENSMUSG00000062151	Unc13c	0.329764	0.0966539	0.562873	8.31379	2.91008	0.00738224	0.0968319	-3.69649
ENSMUSG00000028779	Pef1	0.29386	0.0685319	0.519188	4.85265	2.62805	0.0117667	0.12891	-3.69934
ENSMUSG00000034472	Rasd2	0.251534	0.0722484	0.430819	7.84182	2.83119	0.00708401	0.0944081	-3.70106
ENSMUSG00000078453	Abracl	-0.478683	-0.878079	-0.0792858	3.07038	-2.41519	0.0199326	0.172969	-3.70609
ENSMUSG00000022141	Nipbl	0.235315	0.0650367	0.405592	7.03417	2.78483	0.00785794	0.101058	-3.70718
ENSMUSG00000024603	Dctn4	0.223222	0.0599292	0.386514	6.46769	2.75472	0.00849976	0.105335	-3.71046
ENSMUSG00000007411	Mark3	0.289411	0.0756736	0.503148	6.13606	2.72862	0.00909518	0.109686	-3.71363
ENSMUSG00000033285	Wdr3	0.461789	0.0830093	0.84057	3.52034	2.45677	0.0180178	0.163368	-3.71442
ENSMUSG00000038034	Igsf8	0.29008	0.0738208	0.506338	5.85621	2.70303	0.00971584	0.113636	-3.71766
ENSMUSG00000037166	Ppp1r14a	-0.481955	-0.881373	-0.0825381	3.23048	-2.43157	0.019157	0.169423	-3.7178
ENSMUSG00000028426	Rad23b	0.241133	0.0651161	0.41715	6.63487	2.76064	0.00836989	0.104281	-3.71791
ENSMUSG00000024271	Elp2	0.258129	0.0664816	0.449776	6.00981	2.7142	0.00944028	0.111448	-3.71916
ENSMUSG00000030654	Arl6ip1	0.200461	0.058317	0.342605	8.5814	2.8419	0.00676281	0.0913765	-3.72317
ENSMUSG00000021707	Dhfr	0.418895	0.075993	0.761797	3.49231	2.46174	0.0178003	0.162384	-3.72377
ENSMUSG00000041781	Cpsf2	0.300709	0.0755214	0.525897	5.69534	2.69097	0.0100217	0.116042	-3.72482
ENSMUSG00000051067	Lingo3	0.39189	0.0856481	0.698132	4.57577	2.57874	0.0133241	0.139497	-3.72888
ENSMUSG00000063904	Dpp3	-0.45271	-0.821538	-0.083882	3.57096	-2.47345	0.0172975	0.159899	-3.73109
ENSMUSG00000058239	Usf2	0.244491	0.0705558	0.418426	8.45414	2.83873	0.00701399	0.0937444	-3.73366
ENSMUSG00000041638	Gcn1l1	0.47495	0.081185	0.868714	3.30707	2.43063	0.0192011	0.169548	-3.7375
ENSMUSG00000048251	Bcl11b	0.233275	0.0677275	0.398822	8.65372	2.84309	0.00685148	0.092165	-3.73864
ENSMUSG00000015755	Tab2	0.230879	0.0621	0.399659	6.7015	2.7566	0.00845838	0.105086	-3.74131
ENSMUSG00000024925	Rnaseh2c	-0.358863	-0.644089	-0.073638	4.17675	-2.53541	0.0148457	0.148341	-3.74462
ENSMUSG00000024998	Plce1	0.391875	0.0775673	0.706183	4.07538	2.51247	0.0157143	0.151991	-3.7506
ENSMUSG00000050965	Prkca	0.287644	0.0796166	0.495672	7.46444	2.80652	0.0081084	0.102675	-3.75822
ENSMUSG00000028617	Lrrc42	0.432344	0.0841333	0.780554	4.09175	2.50204	0.0161238	0.15372	-3.76536
ENSMUSG00000040740	Slc25a34	0.427446	0.0743716	0.780519	3.54809	2.43962	0.0187862	0.167451	-3.76628
ENSMUSG00000020929	Eftud2	0.31725	0.068498	0.566003	4.56588	2.57006	0.0136171	0.141277	-3.77013
ENSMUSG00000002052	Supt6	0.312203	0.0734532	0.550952	5.32239	2.63513	0.0115572	0.127116	-3.77422
ENSMUSG00000006442	Srm	0.341792	0.0726578	0.610927	4.58739	2.55918	0.0139925	0.143004	-3.78364
ENSMUSG00000029014	Dnajc2	0.298204	0.070253	0.526154	5.4021	2.63621	0.0115255	0.126909	-3.78427
ENSMUSG00000049999	Ppp1r3d	0.485067	0.0768797	0.893255	3.24359	2.39469	0.0209422	0.17755	-3.78753
rÇç}ENSMUSG00000038323	RP24-77I21.3	-0.534713	-0.970817	-0.0986091	3.82036	-2.49011	0.0177234	0.162087	-3.78886
ENSMUSG00000024853	Sf3b2	0.209224	0.0570768	0.361371	7.44464	2.77112	0.00814442	0.102714	-3.79034
ENSMUSG00000030689	Ino80e	0.330669	0.0709096	0.590429	4.62793	2.56525	0.0137818	0.141942	-3.79126
ENSMUSG00000067578	Cbln4	-0.603832	-1.12647	-0.0811912	2.56737	-2.3282	0.024543	0.194322	-3.79331
ENSMUSG00000047246	Hist1h2be	-0.590447	-1.10115	-0.079747	2.66262	-2.32982	0.024449	0.194118	-3.79378
ENSMUSG00000008153	Clstn3	0.34158	0.0746838	0.608476	4.92007	2.57904	0.0133141	0.139497	-3.79735
ENSMUSG00000051557	Pusl1	-0.420864	-0.764886	-0.0768415	3.7905	-2.46526	0.017648	0.161697	-3.79802
ENSMUSG00000031060	Rbm10	0.294524	0.0639963	0.525051	4.76288	2.57457	0.0134639	0.140425	-3.79819
ENSMUSG00000021178	Psmc1	0.211209	0.0575687	0.364849	7.49956	2.77023	0.00816342	0.102714	-3.79826
ENSMUSG00000046962	Zbtb21	0.533943	0.0748705	0.993015	2.8273	2.3438	0.0236515	0.189769	-3.79842
ENSMUSG00000039246	Lyplal1	-0.549476	-1.03026	-0.0686961	2.49368	-2.30309	0.0260414	0.199388	-3.80024
ENSMUSG00000051344	Plekhm3	0.302572	0.0656951	0.539449	4.8208	2.57403	0.0134822	0.140468	-3.80114
ENSMUSG00000054675	Tmem119	0.450255	0.0691889	0.831321	3.22641	2.38104	0.0216404	0.179767	-3.80273
ENSMUSG00000020387	Jade2	0.25282	0.0609293	0.444711	5.65024	2.655	0.0109875	0.123744	-3.80405
ENSMUSG00000034903	Cobll1	0.55276	0.071853	1.03367	2.57473	2.31624	0.0252469	0.196814	-3.80445
ENSMUSG00000026333	Gin1	-0.395879	-0.721383	-0.0703751	3.7737	-2.45083	0.0182805	0.164741	-3.80618
ENSMUSG00000043683	Fem1a	0.253284	0.0608209	0.445746	5.69033	2.65197	0.0110729	0.123998	-3.8067
ENSMUSG00000078877	RP23-86F8.3	-0.429867	-0.781314	-0.0784193	3.75673	-2.4648	0.0176679	0.16173	-3.80774
ENSMUSG00000029348	Asphd2	0.214632	0.056238	0.373027	6.80001	2.73063	0.00904786	0.109386	-3.81414
ENSMUSG00000022760	Thap7	0.431348	0.0702714	0.792424	3.49055	2.40733	0.0203142	0.174624	-3.81487
ENSMUSG00000027375	Mal	-0.282233	-0.490074	-0.0743911	6.99203	-2.74558	0.00904812	0.109386	-3.81501
ENSMUSG00000032609	Klhdc8b	-0.396494	-0.72051	-0.0724775	3.8934	-2.46591	0.0176199	0.161697	-3.81681
ENSMUSG00000043241	Upf2	0.266758	0.0632255	0.47029	5.53281	2.64114	0.0113821	0.126173	-3.82001
ENSMUSG00000042671	Rgs8	0.366427	0.0877045	0.64515	5.8319	2.67295	0.0115183	0.126909	-3.82376
ENSMUSG00000005054	Cstb	-0.348237	-0.6176	-0.0788734	5.19984	-2.60868	0.0125213	0.134135	-3.82854
ENSMUSG00000031807	Pgls	0.314988	0.0676244	0.562351	4.8051	2.56605	0.0137541	0.141805	-3.829
ENSMUSG00000041548	Hspb8	0.415186	0.0768424	0.75353	4.1186	2.47282	0.0173245	0.159899	-3.83073
ENSMUSG00000030772	Dkk3	-0.21103	-0.366253	-0.0558067	7.12705	-2.73965	0.008839	0.108048	-3.83363
ENSMUSG00000055065	Ddx17	-0.235326	-0.410144	-0.0605086	6.62665	-2.71264	0.00947822	0.111448	-3.83381
ENSMUSG00000021061	Sptb	0.279104	0.0665944	0.491613	5.70679	2.64664	0.0112239	0.125264	-3.8364
ENSMUSG00000025731	RP23-356J2.10	-0.320919	-0.5804	-0.0614384	4.19884	-2.49229	0.0165159	0.155805	-3.8394
ENSMUSG00000026127	Imp4	0.323964	0.0700314	0.577897	4.95353	2.5709	0.0135882	0.141277	-3.84095
ENSMUSG00000040928	S100pbp	0.264124	0.0633106	0.464938	5.78352	2.65047	0.0111152	0.124332	-3.84252
ENSMUSG00000024308	Tapbp	0.401527	0.076283	0.726772	4.30772	2.48779	0.0166998	0.156821	-3.84274
ENSMUSG00000039879	Heca	0.308649	0.0659164	0.551381	4.86264	2.56239	0.0138808	0.142516	-3.84276
ENSMUSG00000028211	Trp53inp1	0.40762	0.0756424	0.739597	4.00459	2.47431	0.0172612	0.159899	-3.84306
ENSMUSG00000034154	Ino80	0.299609	0.0643742	0.534845	4.88658	2.56661	0.0137348	0.141754	-3.84311
ENSMUSG00000039831	Arhgap29	0.378863	0.0707484	0.686978	4.1477	2.47786	0.0171116	0.159128	-3.84615
ENSMUSG00000093674	Rpl41	-0.232028	-0.399056	-0.0650002	8.86478	-2.80511	0.00764449	0.0994496	-3.84931
ENSMUSG00000022940	Pigp	-0.358518	-0.635624	-0.0814119	5.29628	-2.6173	0.0125654	0.134224	-3.85155
ENSMUSG00000024012	Mtch1	0.222902	0.0621895	0.383614	8.81261	2.79636	0.00767259	0.0995823	-3.85617
ENSMUSG00000042426	Dhx29	0.300393	0.063116	0.537669	4.79872	2.55119	0.0142743	0.1449	-3.85676
ENSMUSG00000028833	Ncdn	0.204662	0.0553201	0.354004	7.87755	2.76162	0.00834865	0.104281	-3.85843
ENSMUSG00000015711	Prune	0.332222	0.0648997	0.599544	4.37159	2.50438	0.016031	0.152994	-3.85857
ENSMUSG00000029708	Gcc1	0.527597	0.0768528	0.978342	3.28572	2.35874	0.0228255	0.185248	-3.85975
ENSMUSG00000025202	Scd3	0.458243	0.0726098	0.843875	3.5078	2.39458	0.020948	0.17755	-3.86565
ENSMUSG00000106918	Mrpl33	-0.274488	-0.481796	-0.0671808	6.18067	-2.66819	0.010624	0.120891	-3.86835
ENSMUSG00000002102	Psmc3	0.23288	0.0607244	0.405035	7.23432	2.72596	0.00915793	0.11004	-3.86862
ENSMUSG00000053702	Nebl	0.259557	0.0620381	0.457076	5.88836	2.64808	0.0111829	0.124947	-3.86984
ENSMUSG00000032547	Ryk	0.303048	0.0691148	0.536981	5.43071	2.61052	0.0123	0.132627	-3.87146
ENSMUSG00000031012	Cask	0.227877	0.0550981	0.400656	6.04625	2.65777	0.0109103	0.123296	-3.87575
ENSMUSG00000022555	Dgat1	0.574087	0.0662951	1.08188	2.70743	2.27824	0.0276037	0.206544	-3.87784
ENSMUSG00000032602	Slc25a20	0.393894	0.0680519	0.719735	3.80602	2.43601	0.0189516	0.168332	-3.88017
ENSMUSG00000037224	Zfyve28	0.376769	0.0688239	0.684714	4.21699	2.46553	0.0176365	0.161697	-3.88474
ENSMUSG00000032479	Map4	-0.173703	-0.299626	-0.0477802	8.69796	-2.77978	0.00796229	0.101875	-3.88474
ENSMUSG00000038552	Fndc4	-0.29356	-0.517219	-0.0699022	5.88416	-2.64576	0.0112843	0.125512	-3.88543
ENSMUSG00000052962	Mrpl35	0.258029	0.0575443	0.458514	5.3932	2.59355	0.0128375	0.135901	-3.89121
ENSMUSG00000025066	Sfr1	0.211672	0.0561683	0.367175	7.79685	2.74303	0.00876182	0.107637	-3.89266
ENSMUSG00000079427	Mthfsl	-0.469034	-0.868055	-0.0700123	3.44708	-2.36873	0.0222875	0.182079	-3.8994
ENSMUSG00000022160	Mettl3	0.512129	0.0608873	0.96337	2.76787	2.28706	0.0270397	0.203462	-3.90039
ENSMUSG00000031617	Tmem184c	-0.217017	-0.378821	-0.0552132	6.97921	-2.70279	0.00972181	0.113636	-3.90289
ENSMUSG00000073433	Arhgdig	-0.333787	-0.591513	-0.0760598	5.59822	-2.61869	0.0124616	0.133641	-3.90336
ENSMUSG00000036503	Rnf13	0.260416	0.0632762	0.457556	6.35896	2.66196	0.0107944	0.122393	-3.9056
ENSMUSG00000046818	Ddit4l	0.295535	0.0637143	0.527355	5.15233	2.569	0.013653	0.141419	-3.90602
ENSMUSG00000041926	Rnpep	-0.40203	-0.737634	-0.0664268	3.76446	-2.41401	0.0199891	0.172969	-3.90887
ENSMUSG00000061232	H2-K1	0.395506	0.0677237	0.723287	4.0093	2.43151	0.0191602	0.169423	-3.91958
ENSMUSG00000053007	Creb5	0.461763	0.0704045	0.853122	3.55034	2.37767	0.0218156	0.180161	-3.92124
ENSMUSG00000079659	Tmem243	-0.468801	-0.87761	-0.0599922	3.09731	-2.31087	0.0255684	0.19807	-3.92477
ENSMUSG00000055541	Lair1	-0.400604	-0.734223	-0.0669843	3.88227	-2.41975	0.0197136	0.171703	-3.92598
ENSMUSG00000062647	Rpl7a	-0.358977	-0.624753	-0.0931999	7.59123	-2.7907	0.0102615	0.118403	-3.92698
ENSMUSG00000022561	Gpaa1	0.291592	0.0637121	0.519472	5.48104	2.57856	0.01333	0.139497	-3.92775
ENSMUSG00000016150	Tenm1	0.349261	0.0727449	0.625777	5.14915	2.54749	0.0145213	0.146504	-3.92849
ENSMUSG00000028869	Gnl2	0.499475	0.0790683	0.919881	3.8959	2.40289	0.0211077	0.17755	-3.92999
ENSMUSG00000032402	Smad3	0.242163	0.0545388	0.429787	5.70055	2.60092	0.0126015	0.134412	-3.93264
ENSMUSG00000014837	RP23-127B8.5	-0.45807	-0.858589	-0.0575507	2.99776	-2.30471	0.0259422	0.199388	-3.93298
ENSMUSG00000039205	Ciz1	0.387919	0.0617637	0.714075	3.83713	2.39676	0.0208384	0.17755	-3.93525
ENSMUSG00000032281	Acsbg1	0.198319	0.0515735	0.345064	7.69754	2.72337	0.00921926	0.110346	-3.93599
ENSMUSG00000036019	Tmtc2	0.480473	0.05567	0.905276	2.81048	2.27923	0.0275396	0.206223	-3.94033
ENSMUSG00000089917	Uckl1	-0.594187	-1.13271	-0.0556645	2.27662	-2.22345	0.0313477	0.220057	-3.94201
ENSMUSG00000037348	Paqr7	-0.315682	-0.570034	-0.06133	4.83768	-2.50105	0.0161633	0.15375	-3.94236
ENSMUSG00000063600	Egfem1	-0.450436	-0.844922	-0.0559512	3.04089	-2.30097	0.0261715	0.199919	-3.94247
ENSMUSG00000030861	Acadsb	0.236703	0.0539053	0.4195	5.82339	2.6094	0.0123348	0.132713	-3.94491
ENSMUSG00000053453	Thoc7	-0.215954	-0.375685	-0.0562226	7.87332	-2.72445	0.00919367	0.110335	-3.945
ENSMUSG00000016559	H3f3b	0.205201	0.052818	0.357583	7.58781	2.71363	0.0094541	0.111448	-3.94635
ENSMUSG00000036560	Lgi4	0.303284	0.0619058	0.544661	5.0456	2.53197	0.014973	0.149062	-3.94642
ENSMUSG00000030835	Nomo1	0.224935	0.0530857	0.396785	6.22641	2.63765	0.0114835	0.126871	-3.94727
ENSMUSG00000011179	Odc1	0.488105	0.0583858	0.917825	2.94511	2.28895	0.0269204	0.203292	-3.95184
ENSMUSG00000013921	Clip3	0.205358	0.0513273	0.359388	7.05334	2.68666	0.0101333	0.117197	-3.95425
ENSMUSG00000030616	Sytl2	-0.312384	-0.560729	-0.0640398	4.97654	-2.53479	0.0148686	0.148341	-3.95537
ENSMUSG00000036766	Dner	0.242473	0.0583766	0.42657	6.63564	2.65415	0.0110115	0.123829	-3.95539
ENSMUSG00000027742	Cog6	-0.394522	-0.72601	-0.063033	3.80176	-2.39834	0.0207595	0.177304	-3.95656
ENSMUSG00000028614	Ndc1	0.466501	0.0578862	0.875115	3.20366	2.30063	0.0261925	0.199925	-3.96027
ENSMUSG00000020612	Prkar1a	0.181326	0.0477953	0.314856	8.40421	2.73645	0.00891263	0.108679	-3.966
ENSMUSG00000043388	Tmem130	0.311935	0.0684179	0.555452	5.72485	2.58355	0.013274	0.139476	-3.96734
ENSMUSG00000021906	Oxnad1	0.36715	0.0573652	0.676935	3.74669	2.38831	0.0212659	0.178305	-3.96828
ENSMUSG00000075289	Carns1	-0.496635	-0.936429	-0.0568409	2.99436	-2.2756	0.0277746	0.2067	-3.97279
ENSMUSG00000031483	Erlin2	0.305152	0.0609182	0.549385	4.98594	2.51778	0.015509	0.15169	-3.97657
ENSMUSG00000047215	Rpl9	-0.203356	-0.350818	-0.0558942	9.97984	-2.78057	0.00800169	0.101978	-3.98092
ENSMUSG00000020801	Med31	-0.45289	-0.829912	-0.0758679	4.10504	-2.4312	0.0198397	0.172497	-3.98435
ENSMUSG00000020271	Fbxw11	0.245307	0.057121	0.433492	6.29508	2.62682	0.0118032	0.12891	-3.98534
ENSMUSG00000026810	Dpm2	0.3326	0.058942	0.606258	4.43545	2.44919	0.0183541	0.165103	-3.98806
ENSMUSG00000058997	Vwa8	0.341492	0.0617059	0.621279	4.53181	2.45959	0.0178944	0.162863	-3.98859
ENSMUSG00000090258	Churc1	-0.472208	-0.871632	-0.0727835	3.83191	-2.38994	0.0216913	0.179881	-3.99163
ENSMUSG00000021500	Ddx46	0.284035	0.0563239	0.511747	5.01924	2.51359	0.0156705	0.151991	-3.99286
ENSMUSG00000045996	Polr2k	-0.56048	-1.05106	-0.0699032	3.33215	-2.31188	0.0262271	0.199957	-3.99649
ENSMUSG00000020912	Krt12	-0.344075	-0.627295	-0.0608556	4.43024	-2.44815	0.0184005	0.16537	-3.99744
ENSMUSG00000005973	Rcn1	0.346378	0.062078	0.630679	4.48926	2.45517	0.0180884	0.163458	-3.9999
ENSMUSG00000021262	Evl	-0.255093	-0.449527	-0.0606596	6.61293	-2.64384	0.0113042	0.125593	-4.00168
ENSMUSG00000011837	Snapc2	0.421827	0.0643376	0.779316	3.86281	2.37782	0.0218079	0.180161	-4.003
ENSMUSG00000032540	Abhd5	0.289792	0.0550478	0.524535	4.83407	2.48771	0.016703	0.156821	-4.00601
ENSMUSG00000042363	Lgalsl	0.254982	0.0571187	0.452845	5.99848	2.59688	0.0127303	0.135201	-4.00608
ENSMUSG00000027381	Bcl2l11	0.453797	0.0592969	0.848297	3.35932	2.31805	0.0251393	0.19644	-4.00877
ENSMUSG00000005533	Igf1r	0.257175	0.0590839	0.455265	6.28399	2.6162	0.0121246	0.131274	-4.00956
ENSMUSG00000021991	Cacna2d3	0.436399	0.0795751	0.793223	4.7309	2.48842	0.0180645	0.163458	-4.00974
ENSMUSG00000018974	Sart3	0.351658	0.0556684	0.647647	4.03507	2.39415	0.0209695	0.17755	-4.01167
ENSMUSG00000029924	Slc37a3	0.349638	0.0597453	0.63953	4.40754	2.43046	0.0192087	0.169548	-4.0118
ENSMUSG00000000823	Zfp512b	0.339768	0.0543772	0.62516	4.12791	2.39911	0.0207208	0.177304	-4.01189
ENSMUSG00000031697	Orc6	-0.439972	-0.821401	-0.0585435	3.47921	-2.32445	0.024762	0.195216	-4.01405
ENSMUSG00000003929	Zfp81	0.34472	0.0585287	0.630911	4.44578	2.42727	0.0193581	0.170074	-4.01571
ENSMUSG00000029394	Cdk2ap1	0.239633	0.0556079	0.423658	6.52613	2.62408	0.0118854	0.129572	-4.01894
ENSMUSG00000033880	Lgals3bp	0.579311	0.0614052	1.09722	3.04466	2.25971	0.0292764	0.212281	-4.02056
ENSMUSG00000021958	Pinx1	0.393573	0.0587636	0.728382	3.94903	2.36884	0.0222817	0.182079	-4.02088
ENSMUSG00000035936	Aldh5a1	-0.230919	-0.409038	-0.0528014	6.31293	-2.61252	0.012238	0.132103	-4.02573
ENSMUSG00000026544	Dusp23	0.553141	0.0429016	1.06338	2.55753	2.18459	0.0342695	0.231035	-4.02734
ENSMUSG00000032018	Sc5d	-0.252348	-0.44779	-0.0569067	6.2035	-2.6019	0.0125703	0.134224	-4.02799
ENSMUSG00000048001	Hes5	-0.335225	-0.60325	-0.0672001	5.30309	-2.52394	0.0154671	0.15169	-4.02966
ENSMUSG00000092558	Med20	0.388671	0.0495505	0.727792	3.51361	2.30959	0.0256455	0.198201	-4.03011
ENSMUSG00000020882	Cacnb1	0.27061	0.058221	0.483	5.86435	2.56755	0.0137026	0.14168	-4.0312
ENSMUSG00000029440	Psmd9	0.351943	0.0571763	0.646709	4.19042	2.40603	0.020378	0.174886	-4.03309
ENSMUSG00000059005	Hnrnpa3	0.292587	0.0547677	0.530406	4.82078	2.47922	0.0170546	0.159063	-4.03364
ENSMUSG00000042444	Fam63b	-0.198694	-0.347779	-0.0496092	7.83369	-2.68571	0.010158	0.117345	-4.03582
ENSMUSG00000060923	Acyp2	-0.417575	-0.771481	-0.0636686	4.02415	-2.37768	0.0218151	0.180161	-4.0375
ENSMUSG00000014418	Hps5	-0.551892	-1.05485	-0.0489295	2.68239	-2.21119	0.0322445	0.223337	-4.03808
ENSMUSG00000045503	Sys1	0.321424	0.0609912	0.581856	5.03594	2.48708	0.0167287	0.156913	-4.04467
ENSMUSG00000051234	Rnf7	-0.255304	-0.452224	-0.0583834	6.44412	-2.61261	0.0122353	0.132103	-4.04796
ENSMUSG00000029191	Rfc1	0.24434	0.0512551	0.437425	5.63729	2.55008	0.0143137	0.14515	-4.0487
ENSMUSG00000039298	Cdk5rap2	0.386006	0.0528829	0.71913	3.73425	2.33505	0.0241478	0.192345	-4.05041
ENSMUSG00000049686	Orai1	0.501452	0.0374717	0.965432	2.60878	2.1779	0.0347962	0.232532	-4.05432
ENSMUSG00000061461	Smim20	0.281722	0.0562036	0.50724	5.39595	2.51737	0.015525	0.15169	-4.05664
ENSMUSG00000024454	Hdac3	0.457588	0.0436067	0.871569	2.96021	2.22742	0.031062	0.219318	-4.05939
ENSMUSG00000042350	Arel1	0.29624	0.0565438	0.535936	5.08252	2.49052	0.0165878	0.156334	-4.06119
ENSMUSG00000067713	Prkag1	0.347189	0.0600224	0.634356	4.74932	2.43635	0.0189363	0.168332	-4.06194
ENSMUSG00000035674	Ndufa3	-0.201863	-0.352841	-0.0508845	8.40329	-2.69432	0.00993585	0.115511	-4.06458
ENSMUSG00000028114	Mettl14	0.340606	0.0544039	0.626808	4.29134	2.39821	0.0207658	0.177304	-4.06651
ENSMUSG00000002602	Axl	-0.249325	-0.447815	-0.0508354	5.56955	-2.53125	0.0149998	0.149062	-4.06869
ENSMUSG00000074505	Fat3	0.273341	0.057897	0.488785	5.89347	2.55669	0.0140797	0.143514	-4.07105
ENSMUSG00000003808	Farsa	0.322651	0.0646067	0.580696	5.59825	2.52377	0.0155032	0.15169	-4.07141
ENSMUSG00000071757	Zhx2	0.520718	0.0342243	1.00721	2.54012	2.15691	0.0364945	0.238795	-4.07474
ENSMUSG00000007989	Fzd3	0.266983	0.060975	0.472991	6.66195	2.61528	0.0123252	0.132713	-4.07554
ENSMUSG00000024524	Gnal	0.210506	0.0520076	0.369005	8.09467	2.67638	0.0104038	0.119071	-4.08128
ENSMUSG00000026095	Asnsd1	0.402595	0.05022	0.754971	3.53799	2.30235	0.0260867	0.19958	-4.08453
ENSMUSG00000019873	Reep3	0.261535	0.055121	0.467949	5.92103	2.55328	0.0142	0.144442	-4.08593
ENSMUSG00000030357	Fkbp4	0.259302	0.0580073	0.460597	6.59641	2.59601	0.0127656	0.135431	-4.09109
ENSMUSG00000026275	Ppp1r7	0.200871	0.0473314	0.354411	7.27263	2.63636	0.0115212	0.126909	-4.09259
ENSMUSG00000037949	Ano10	0.530608	0.0367475	1.02447	2.68968	2.1651	0.0358238	0.236763	-4.09307
ENSMUSG00000026939	Tmem141	-0.310234	-0.565125	-0.055344	4.87994	-2.4527	0.0181976	0.164144	-4.09449
ENSMUSG00000032997	Chpf	0.318121	0.0519489	0.584293	4.55982	2.40845	0.0202595	0.174306	-4.10113
ENSMUSG00000040767	Snrnp25	-0.291774	-0.532188	-0.0513599	4.89036	-2.44565	0.0185128	0.165926	-4.1054
ENSMUSG00000038369	Ncoa6	0.287054	0.0527072	0.521401	5.14239	2.46838	0.0175137	0.161064	-4.10625
ENSMUSG00000034220	Gpc1	0.264257	0.0498365	0.478678	5.30446	2.48352	0.0168757	0.157544	-4.10791
ENSMUSG00000024008	Cpne5	0.239605	0.0528855	0.426324	6.54931	2.58591	0.0130862	0.138238	-4.10826
ENSMUSG00000004565	Pnpla6	0.351997	0.0521474	0.651847	4.26573	2.36561	0.0224542	0.182836	-4.1101
ENSMUSG00000074218	Cox7a1	-0.482612	-0.922597	-0.0426267	3.06456	-2.21038	0.0323043	0.223381	-4.11097
ENSMUSG00000056492	Adgrf5	0.418883	0.0583281	0.779438	4.09738	2.34214	0.0238161	0.190471	-4.11313
ENSMUSG00000053012	Krcc1	0.251006	0.0524837	0.449529	5.95315	2.5479	0.0143917	0.145642	-4.11438
ENSMUSG00000021303	Gng4	-0.405748	-0.733426	-0.0780696	5.46908	-2.53788	0.0170801	0.159128	-4.11604
ENSMUSG00000022329	Stk3	-0.329365	-0.606834	-0.0518953	4.40531	-2.39205	0.021076	0.17755	-4.11678
ENSMUSG00000060477	Irak2	0.535829	0.0469638	1.02469	2.99641	2.20974	0.032438	0.223582	-4.11742
ENSMUSG00000071076	Jund	0.278415	0.0592258	0.497605	6.28211	2.56186	0.0140119	0.143004	-4.11845
ENSMUSG00000027400	Pdyn	0.641708	0.0906835	1.19273	4.43392	2.42123	0.0245671	0.194322	-4.11958
ENSMUSG00000056429	Tgoln1	0.24325	0.053144	0.433356	6.48321	2.57849	0.0133325	0.139497	-4.12135
ENSMUSG00000028383	Hsdl2	0.243787	0.0512622	0.436311	6.07666	2.55171	0.0142556	0.144858	-4.12227
ENSMUSG00000003345	Csnk1g2	-0.242169	-0.42727	-0.0570667	7.53289	-2.64013	0.0115779	0.127203	-4.12253
ENSMUSG00000089774	Slc5a3	0.415272	0.0520241	0.778519	3.89146	2.30376	0.0260001	0.199388	-4.12609
ENSMUSG00000075327	Zbtb2	0.551621	0.038251	1.06499	2.78904	2.1653	0.0358073	0.236763	-4.12653
ENSMUSG00000019996	Map7	-0.262158	-0.469543	-0.0547739	6.02718	-2.54739	0.01441	0.145678	-4.12656
ENSMUSG00000038895	Zfp653	-0.543991	-1.05475	-0.0332353	2.50643	-2.14628	0.0373829	0.242278	-4.12771
ENSMUSG00000030965	Fam175b	0.297767	0.0495516	0.545982	4.77117	2.41744	0.0198243	0.172497	-4.1316
ENSMUSG00000021039	Snw1	0.228966	0.0493497	0.408582	6.46225	2.56882	0.0136594	0.141419	-4.13165
ENSMUSG00000019802	Sec63	0.211707	0.0451277	0.378287	6.31294	2.56107	0.0139265	0.142837	-4.13447
ENSMUSG00000070476	Fam217b	0.196043	0.0431789	0.348906	6.65019	2.58437	0.0131373	0.138481	-4.13831
ENSMUSG00000004035	Gstm7	0.397855	0.0517372	0.743972	3.87573	2.31637	0.0252388	0.196814	-4.13907
ENSMUSG00000028419	Chmp5	-0.20733	-0.366399	-0.0482609	7.48677	-2.62654	0.0118117	0.12891	-4.14013
ENSMUSG00000051617	Krt9	0.4381	0.0397539	0.836447	3.16193	2.21626	0.031871	0.221683	-4.14193
HÇ∑}ENSMUSG00000034259	Exosc4	0.326163	0.0437932	0.608533	3.96409	2.32768	0.0245731	0.194322	-4.14225
ENSMUSG00000039536	Stau1	0.31313	0.0532468	0.573013	4.85296	2.42803	0.0193224	0.170074	-4.14492
ENSMUSG00000033350	Chst2	-0.20828	-0.366964	-0.0495962	7.99345	-2.64498	0.0112715	0.125511	-4.14495
ENSMUSG00000071654	Uqcc3	-0.304198	-0.554783	-0.0536123	5.08143	-2.44629	0.018484	0.165819	-4.14532
ENSMUSG00000074746	Pdzd8	0.231889	0.0476907	0.416086	6.06892	2.53689	0.0147911	0.148317	-4.149
ENSMUSG00000031523	Dlc1	0.220023	0.0493704	0.390675	6.94989	2.59814	0.0126899	0.134968	-4.15068
ENSMUSG00000024290	Rock1	0.21691	0.0491566	0.384663	7.18995	2.60565	0.0124522	0.133641	-4.15123
ENSMUSG00000014313	Cox6c	-0.185499	-0.323266	-0.0477314	10.2222	-2.71333	0.00946149	0.111448	-4.15381
ENSMUSG00000052906	Ubxn8	0.330374	0.041331	0.619416	3.79409	2.3033	0.0260281	0.199388	-4.1555
ENSMUSG00000063873	Slc24a3	0.246183	0.0540275	0.438339	6.84213	2.58174	0.0132241	0.139099	-4.156
ENSMUSG00000030894	Tpp1	0.230263	0.0480677	0.412458	6.19853	2.5468	0.0144312	0.145743	-4.1566
ENSMUSG00000042763	Maneal	0.378057	0.0472713	0.708842	3.91171	2.30313	0.0260388	0.199388	-4.15667
ENSMUSG00000066233	Tmem42	-0.41831	-0.784629	-0.0519915	3.95812	-2.30116	0.0261596	0.199919	-4.1645
ENSMUSG00000044176	Spink10	-0.461406	-0.891541	-0.0312709	2.8822	-2.16165	0.0361047	0.237086	-4.16866
ENSMUSG00000057322	Rpl38	-0.216817	-0.379716	-0.0539193	9.45161	-2.69063	0.0103804	0.119071	-4.17248
ENSMUSG00000031245	Hmgn5	-0.392175	-0.729598	-0.0547518	4.25057	-2.3432	0.0237613	0.190289	-4.1739
ENSMUSG00000021686	Ap3b1	0.275098	0.0498615	0.500334	5.35103	2.46125	0.0178216	0.162384	-4.17408
ENSMUSG00000036138	Acaa1a	0.349035	0.0456916	0.652378	4.06208	2.31869	0.0251013	0.196299	-4.17472
ENSMUSG00000036114	Rpp25l	0.406534	0.0428837	0.770185	3.66655	2.25279	0.0292902	0.212281	-4.1757
ENSMUSG00000020099	Unc5b	0.485597	0.0332143	0.93798	2.99697	2.16311	0.035986	0.23693	-4.17756
ENSMUSG00000031386	Hcfc1	0.270275	0.0554624	0.485089	6.22101	2.53659	0.0148635	0.148341	-4.17945
ENSMUSG00000038909	Kat7	0.254708	0.0505167	0.4589	5.94037	2.5137	0.0156665	0.151991	-4.18044
ENSMUSG00000020178	Adora2a	0.456859	0.0511856	0.862533	3.75027	2.27254	0.028221	0.208055	-4.18053
ENSMUSG00000030376	Slc8a2	0.238727	0.0489992	0.428455	6.33571	2.53559	0.0148393	0.148341	-4.18323
ENSMUSG00000057719	Sh3rf2	0.619063	0.0228959	1.21523	2.5133	2.09416	0.0421778	0.257472	-4.18332
ENSMUSG00000052139	Bre	0.36618	0.0463194	0.68604	4.02278	2.30697	0.0258046	0.198963	-4.1835
ENSMUSG00000008429	Herpud2	0.318035	0.049324	0.586745	4.55797	2.38505	0.0214331	0.178646	-4.1852
ENSMUSG00000069565	Dazap1	0.262083	0.0506476	0.473519	5.83288	2.49786	0.0162908	0.15427	-4.19033
ENSMUSG00000038150	Ormdl3	0.37834	0.0449164	0.711764	3.8453	2.28662	0.0270678	0.203462	-4.19072
ENSMUSG00000046922	Gpr6	-0.689713	-1.36581	-0.0136122	2.08708	-2.06235	0.0457707	0.26892	-4.1925
ENSMUSG00000031938	RP23-424C4.5	0.288553	0.0519294	0.525176	5.3267	2.4574	0.0179903	0.163318	-4.19409
ENSMUSG00000062328	Rpl17	-0.30331	-0.5338	-0.0728198	8.9566	-2.71499	0.0120427	0.130853	-4.19717
ENSMUSG00000024597	Slc12a2	0.305096	0.0520681	0.558123	5.22038	2.42983	0.0192383	0.169657	-4.20235
ENSMUSG00000030994	RP23-445H7.1	0.47773	0.0254914	0.929968	2.73256	2.12874	0.0388896	0.247655	-4.20309
ENSMUSG00000021690	Jmy	0.273094	0.0547612	0.491426	6.10856	2.52253	0.0154338	0.15169	-4.20532
ENSMUSG00000024240	Epc1	0.253324	0.047245	0.459403	5.65793	2.47714	0.0171421	0.159128	-4.20571
ENSMUSG00000028039	Efna3	-0.341215	-0.637992	-0.0444379	4.19335	-2.31689	0.0252081	0.196814	-4.20915
ENSMUSG00000022052	Ppp2r2a	0.243803	0.0538567	0.433749	7.36133	2.59016	0.0131252	0.138481	-4.20989
ENSMUSG00000028960	Ube4b	0.226685	0.0445702	0.4088	6.06277	2.50833	0.0158755	0.152254	-4.21158
ENSMUSG00000001288	Rarg	0.470575	0.023194	0.917955	2.80425	2.11962	0.0396935	0.250154	-4.21161
ENSMUSG00000028645	Slc2a1	0.312479	0.0507603	0.574197	4.95714	2.40599	0.0203801	0.174886	-4.21267
ENSMUSG00000018931	Natd1	0.570764	0.0238657	1.11766	2.59981	2.10309	0.0411892	0.25379	-4.2128
ENSMUSG00000024811	Tnks2	0.208033	0.042483	0.373583	6.38998	2.53227	0.0149618	0.149062	-4.21559
ENSMUSG00000015747	Vps45	-0.423465	-0.80267	-0.0442596	3.76622	-2.25035	0.0294563	0.212514	-4.21624
ENSMUSG00000054474	Thnsl2	0.499607	0.0213619	0.977853	2.7055	2.10516	0.040999	0.253406	-4.21643
ENSMUSG00000030042	Pole4	0.295366	0.0546687	0.536063	5.59433	2.47476	0.0173547	0.159899	-4.21754
ENSMUSG00000063785	Utp14a	0.441274	0.0386196	0.843929	3.46495	2.20843	0.0324496	0.223582	-4.21756
ENSMUSG00000079317	Trappc2	-0.362336	-0.670015	-0.0546566	4.53723	-2.37646	0.0221065	0.181501	-4.22037
ENSMUSG00000050944	Efcab5	-0.380739	-0.728276	-0.0332023	3.338	-2.20767	0.0325062	0.223582	-4.22608
ENSMUSG00000034685	Fam171a2	0.2819	0.0505325	0.513267	5.6239	2.45528	0.0180836	0.163458	-4.22845
ENSMUSG00000017664	Slc35c2	0.360337	0.0401113	0.680563	3.84636	2.26757	0.0283	0.208055	-4.2357
ENSMUSG00000078974	Sec61g	-0.464802	-0.883221	-0.046383	3.70702	-2.24421	0.0303455	0.216264	-4.23848
ENSMUSG00000041084	Ostc	0.234011	0.0472952	0.420727	6.5371	2.52559	0.015212	0.1504	-4.24026
ENSMUSG00000032840	AC125061.1	0.500527	0.0249944	0.976059	2.88321	2.12107	0.0395652	0.250154	-4.24096
ENSMUSG00000062960	Kdr	0.340164	0.0446419	0.635686	4.38255	2.31956	0.0250494	0.196259	-4.24168
ENSMUSG00000039001	Rps21	-0.235483	-0.410901	-0.0600655	11.4013	-2.74851	0.0103082	0.118803	-4.24405
ENSMUSG00000021536	Adcy2	-0.233818	-0.424307	-0.0433299	5.8154	-2.47353	0.0172942	0.159899	-4.24491
ENSMUSG00000028273	Pdlim5	0.271993	0.0491211	0.494865	5.63133	2.45929	0.0179072	0.162863	-4.2459
ENSMUSG00000062169	Cnih4	0.221485	0.0444844	0.398485	6.47367	2.52161	0.0153628	0.15169	-4.24674
ENSMUSG00000020705	Ddx42	0.319497	0.0523149	0.586679	5.17716	2.41081	0.0202149	0.174226	-4.24719
ENSMUSG00000012422	Tmem167	-0.220823	-0.396113	-0.0455325	6.67027	-2.5386	0.0147287	0.148142	-4.24789
ENSMUSG00000029681	Bcl7b	0.301711	0.0399925	0.563429	4.34181	2.32308	0.0248421	0.19551	-4.2529
ENSMUSG00000049401	Ogfr	0.374206	0.0410026	0.70741	3.94683	2.26313	0.0285944	0.208895	-4.2564
ENSMUSG00000021838	Samd4	0.198766	0.0424863	0.355045	7.19293	2.56299	0.0138598	0.142448	-4.25695
ENSMUSG00000025580	Eif4a3	0.232773	0.0451085	0.420438	6.2793	2.49953	0.0162241	0.153933	-4.25734
ENSMUSG00000042670	Immp1l	-0.252243	-0.454546	-0.0499397	6.3468	-2.5126	0.0157089	0.151991	-4.25756
ENSMUSG00000049612	Omg	-0.290806	-0.533658	-0.0479538	5.29315	-2.41306	0.020035	0.172977	-4.25815
ENSMUSG00000024767	Otub1	0.212019	0.0421283	0.381911	6.44798	2.51485	0.0156218	0.151991	-4.26064
ENSMUSG00000009681	Bcr	0.226007	0.0479991	0.404015	7.19264	2.55853	0.0140152	0.143004	-4.26481
ENSMUSG00000022538	Lsg1	0.411481	0.0305733	0.792389	3.42542	2.1769	0.0348756	0.232905	-4.26517
ENSMUSG00000003541	Ier3	0.484813	0.0223902	0.947237	2.92725	2.11272	0.0403119	0.251311	-4.26522
ENSMUSG00000021248	Tmed10	0.215133	0.0427487	0.387517	6.48583	2.51488	0.0156208	0.151991	-4.2688
ENSMUSG00000041671	Pyroxd1	0.383623	0.0321919	0.735055	3.55692	2.19974	0.0331025	0.226109	-4.27037
ENSMUSG00000029198	Grpel1	-0.31267	-0.579971	-0.0453682	4.72272	-2.35718	0.0229106	0.185787	-4.27094
ENSMUSG00000005672	Kit	0.508066	0.0121938	1.00394	2.60042	2.06471	0.0448526	0.266817	-4.27123
ENSMUSG00000002833	Hdgfrp2	0.353289	0.0404791	0.666098	4.21359	2.27592	0.0277536	0.2067	-4.27201
ENSMUSG00000031568	Rwdd4a	0.23924	0.0451314	0.43335	6.10112	2.48368	0.0168689	0.157544	-4.27299
ENSMUSG00000026798	Coq4	-0.428708	-0.820993	-0.0364233	3.52909	-2.20226	0.0329124	0.225278	-4.27337
ENSMUSG00000026958	Dpp7	-0.522845	-1.03431	-0.011377	2.53777	-2.05998	0.045323	0.267629	-4.27394
ENSMUSG00000049305	Ccdc71	0.336871	0.0316786	0.642064	3.81205	2.22432	0.0312846	0.219927	-4.27629
ENSMUSG00000024579	Pcyox1l	0.566224	0.00607451	1.12637	2.49541	2.037	0.04767	0.273107	-4.2786
ENSMUSG00000018572	Phf23	0.247942	0.0437906	0.452093	5.71139	2.4474	0.018434	0.16552	-4.28086
ENSMUSG00000022702	Hira	0.258564	0.0401669	0.476962	5.01505	2.38577	0.021396	0.178646	-4.28124
ENSMUSG00000035164	Zc3h12c	0.591052	0.00603357	1.17607	2.35253	2.03593	0.0477818	0.273431	-4.28132
ENSMUSG00000020562	Efcab10	-0.398405	-0.762034	-0.0347768	3.65612	-2.20788	0.0324908	0.223582	-4.2817
ENSMUSG00000026662	Sephs1	0.370307	0.0339155	0.706698	3.75154	2.21832	0.03172	0.221276	-4.28668
ENSMUSG00000020708	Psmc5	0.196447	0.0431433	0.34975	7.99702	2.58226	0.0132067	0.139065	-4.2875
ENSMUSG00000020629	Adi1	0.307645	0.0423023	0.572987	4.60559	2.33642	0.0240698	0.192013	-4.2881
ENSMUSG00000023826	Park2	0.466952	0.0176689	0.916235	2.77811	2.0944	0.0419947	0.256831	-4.28954
ENSMUSG00000039840	Epg5	0.435272	0.0274301	0.843113	3.22234	2.15068	0.0370127	0.240826	-4.29041
ENSMUSG00000025487	Psmd13	0.302919	0.0530956	0.552742	5.86732	2.45015	0.0187218	0.167132	-4.29162
ENSMUSG00000062761	Zfp512	0.333211	0.0395691	0.626854	4.30778	2.2867	0.0270627	0.203462	-4.29298
ENSMUSG00000020530	Ggnbp2	0.195088	0.041551	0.348626	7.55327	2.5605	0.0139463	0.142892	-4.29458
ENSMUSG00000061024	Rrs1	0.314897	0.0415124	0.588281	4.53314	2.32114	0.024956	0.195918	-4.29817
ENSMUSG00000029563	Foxp2	0.319811	0.052616	0.587007	5.45164	2.41955	0.0202091	0.174226	-4.30001
ENSMUSG00000031925	Maml2	0.411505	0.0337202	0.789289	3.66936	2.19502	0.0334624	0.227623	-4.3022
ENSMUSG00000024921	Smarca2	0.189241	0.0429302	0.335552	8.80446	2.60643	0.0124276	0.133566	-4.30267
ENSMUSG00000056383	RP24-269A16.1	0.24209	0.0381211	0.446059	5.27967	2.39178	0.0210896	0.17755	-4.30297
ENSMUSG00000057963	Itpk1	0.284855	0.0383069	0.531403	4.67467	2.32825	0.0245401	0.194322	-4.3069
ENSMUSG00000022546	Gpt	0.468733	0.0187977	0.918669	2.99533	2.09934	0.0415349	0.255575	-4.307
ENSMUSG00000022812	Gsk3b	0.185217	0.0418171	0.328618	8.76383	2.60279	0.0125422	0.134214	-4.30789
ENSMUSG00000030556	Lrrc28	0.304076	0.0363313	0.57182	4.30461	2.28859	0.0269427	0.203292	-4.31104
ENSMUSG00000040225	Prrc2c	0.24337	0.0480576	0.438683	6.83115	2.51114	0.0157742	0.151991	-4.3128
ENSMUSG00000036918	Ttc7	-0.421771	-0.825147	-0.0183958	2.96088	-2.10705	0.0408264	0.252879	-4.31861
ENSMUSG00000109372	RP24-134N2.1	0.665831	-0.00646887	1.33813	2.30128	2.00393	0.0521358	0.282782	-4.32072
ENSMUSG00000034317	Trim59	-0.374743	-0.710363	-0.039122	4.08527	-2.25005	0.029477	0.212514	-4.3214
ENSMUSG00000068823	Csde1	0.179902	0.0388597	0.320943	8.07207	2.57036	0.0136066	0.141277	-4.32341
ENSMUSG00000019738	Polr2i	0.258811	0.0438723	0.47375	5.74958	2.42647	0.0193954	0.170132	-4.32768
ENSMUSG00000024251	Thada	0.421934	0.0139156	0.829953	2.90395	2.08388	0.0429885	0.260193	-4.32819
ENSMUSG00000024902	Mrpl11	-0.249532	-0.459214	-0.0398503	5.38963	-2.39813	0.0207696	0.177304	-4.3294
ENSMUSG00000015126	Tsr3	0.408175	0.0411723	0.775178	4.08705	2.24437	0.0301265	0.215311	-4.33
ENSMUSG00000038375	Trp53inp2	-0.230292	-0.414538	-0.0460454	6.93534	-2.51876	0.0154714	0.15169	-4.33147
ENSMUSG00000037709	Fam13a	-0.396258	-0.77163	-0.0208856	3.19785	-2.12727	0.039018	0.248041	-4.33217
ENSMUSG00000025949	Pikfyve	0.286007	0.0427706	0.529244	5.15386	2.36949	0.0222467	0.182079	-4.33252
ENSMUSG00000020100	Slc29a3	0.643344	-0.00193481	1.28862	2.46135	2.01792	0.0506569	0.278989	-4.33342
ENSMUSG00000021770	Samd8	0.255658	0.0456718	0.465645	6.17437	2.45344	0.0181646	0.163996	-4.33411
ENSMUSG00000019864	Rtn4ip1	0.467552	0.00519014	0.929913	2.67576	2.03777	0.0475899	0.272982	-4.33484
ENSMUSG00000045287	Rtn4rl1	0.312162	0.0353804	0.588943	4.3572	2.27274	0.0279604	0.207109	-4.33553
ENSMUSG00000034156	Bzrap1	-0.208369	-0.376035	-0.0407033	6.74602	-2.50436	0.016032	0.152994	-4.33667
ENSMUSG00000085795	Zfp703	0.283365	0.0482545	0.518476	5.75685	2.43062	0.0193194	0.170074	-4.33709
ENSMUSG00000022711	Pmm2	0.415738	0.0192923	0.812184	3.15267	2.11322	0.0402675	0.251246	-4.33838
ENSMUSG00000106864	Gtf3c2	0.271155	0.0410899	0.50122	5.13129	2.37506	0.0219525	0.180408	-4.33849
ENSMUSG00000019854	Reps1	0.289115	0.0352899	0.542939	4.47549	2.29532	0.0265208	0.201483	-4.33961
ENSMUSG00000026172	Bcs1l	0.290373	0.0343728	0.546373	4.45751	2.28572	0.0271246	0.203733	-4.34042
ENSMUSG00000036822	Topors	0.352035	0.0395067	0.664563	4.38173	2.26989	0.0281474	0.208055	-4.34183
ENSMUSG00000027663	Zmat3	0.20799	0.0403907	0.375589	6.83992	2.50079	0.0161735	0.15375	-4.34283
ENSMUSG00000018585	Atox1	-0.228403	-0.414201	-0.0426053	6.40549	-2.47725	0.0171376	0.159128	-4.3431
ENSMUSG00000022508	Bcl6	0.301347	0.0362575	0.566437	4.50158	2.29077	0.0268055	0.20288	-4.34403
ENSMUSG00000015224	Cyp2j9	-0.412061	-0.796301	-0.027822	3.5363	-2.16106	0.036153	0.237107	-4.34743
ENSMUSG00000032640	Chsy1	0.413967	0.0306223	0.797312	3.70734	2.17613	0.0349368	0.233156	-4.34835
ENSMUSG00000023973	Cnpy3	0.306121	0.0420595	0.570183	5.01843	2.33612	0.0240867	0.192013	-4.34993
ENSMUSG00000021708	Rasgrf2	0.259197	0.0516392	0.466755	7.20427	2.52934	0.0157675	0.151991	-4.3502
ENSMUSG00000021033	Gstz1	0.284528	0.0372908	0.531764	4.73084	2.3191	0.025077	0.196264	-4.35171
ENSMUSG00000032854	Ugt8a	-0.350957	-0.661599	-0.0403157	4.49831	-2.27668	0.0277044	0.2067	-4.35582
ENSMUSG00000074892	B3galt5	0.406833	0.017072	0.796594	3.12203	2.10342	0.041159	0.253763	-4.35593
ENSMUSG00000010609	Psen2	0.404445	0.024475	0.784416	3.51023	2.14495	0.037495	0.242686	-4.35973
ENSMUSG00000058704	Memo1	-0.45806	-0.900486	-0.0156336	3.0046	-2.08636	0.0427524	0.259536	-4.36001
ENSMUSG00000030265	Kras	0.193021	0.0392425	0.346799	7.49496	2.5294	0.0150691	0.149435	-4.3608
ENSMUSG00000028126	Pip5k1a	0.218406	0.0427812	0.394032	7.07782	2.50603	0.0159661	0.152659	-4.36429
ENSMUSG00000030801	Kat8	0.420024	0.0231482	0.816899	3.50316	2.13269	0.038546	0.24706	-4.36479
ENSMUSG00000046516	Cox17	-0.313596	-0.577656	-0.049536	5.50252	-2.40199	0.0211578	0.17755	-4.36606
ENSMUSG00000027823	Gmps	0.26763	0.0441577	0.491102	5.80378	2.41334	0.0200216	0.172977	-4.36837
ENSMUSG00000002475	Abhd3	-0.480039	-0.891448	-0.0686308	5.26729	-2.42404	0.024297	0.193378	-4.37078
ENSMUSG00000066838	Zfp772	0.422654	0.01113	0.834178	3.08963	2.06965	0.044365	0.264929	-4.37234
ENSMUSG00000036636	Clcn7	0.419434	0.0143487	0.824519	3.06533	2.08653	0.0427361	0.259536	-4.37377
ENSMUSG00000020261	Slc36a1	-0.253728	-0.463208	-0.0442486	6.10164	-2.44081	0.0187319	0.167132	-4.37425
ENSMUSG00000037771	Slc32a1	0.347543	0.0624295	0.632656	6.61465	2.50758	0.0188469	0.167704	-4.37612
ENSMUSG00000049336	Tenm2	0.284413	0.0437205	0.525105	5.4687	2.38119	0.0216323	0.179767	-4.37728
ENSMUSG00000027650	Tti1	0.500408	0.00919134	0.991624	3.01903	2.05286	0.0460393	0.269344	-4.38022
ENSMUSG00000049086	Bmyc	-0.289123	-0.541082	-0.0371649	4.84448	-2.31239	0.0254768	0.19767	-4.38077
ENSMUSG00000056952	Tatdn2	0.236117	0.0395715	0.432662	6.00756	2.42087	0.0196603	0.171542	-4.38085
ENSMUSG00000003617	Cp	0.488738	0.0135815	0.963895	3.10602	2.07275	0.044062	0.26365	-4.38294
ENSMUSG00000022338	Eny2	0.207303	0.0378846	0.376721	6.51012	2.46577	0.0176259	0.161697	-4.38681
ENSMUSG00000004044	Ptrf	0.368197	0.04486	0.691535	4.86285	2.30429	0.0266925	0.202367	-4.3889
ENSMUSG00000009281	Rarres2	-0.500609	-0.985159	-0.016058	3.12783	-2.0847	0.0431883	0.260607	-4.38952
ENSMUSG00000051864	Tbc1d22a	0.270687	0.0404094	0.500965	5.43774	2.36877	0.0222852	0.182079	-4.38988
ENSMUSG00000021143	Pacs2	-0.223277	-0.408226	-0.0383287	6.09807	-2.43277	0.0191015	0.169423	-4.39075
ENSMUSG00000046062	Ppp1r15b	0.412886	0.0384226	0.787349	4.16869	2.2301	0.0315562	0.220737	-4.39105
ENSMUSG00000049517	Rps23	-0.412739	-0.741883	-0.0835945	8.24854	-2.63234	0.016799	0.157377	-4.39205
ENSMUSG00000031153	Gripap1	0.28643	0.0381072	0.534752	5.05728	2.32439	0.0247651	0.195216	-4.39602
ENSMUSG00000018651	Tada2a	0.377563	0.0381555	0.71697	4.36002	2.24467	0.0300917	0.215218	-4.39606
ENSMUSG00000039959	Hip1	0.233279	0.0373046	0.429253	5.76541	2.39874	0.020739	0.177304	-4.39747
ENSMUSG00000038619	Ensa	-0.247851	-0.448651	-0.0470508	6.91264	-2.49293	0.01681	0.157377	-4.39751
ENSMUSG00000063646	Jakmip1	0.265523	0.0412871	0.48976	5.70113	2.38619	0.0213747	0.178646	-4.39855
ENSMUSG00000034064	Poglut1	0.263155	0.0369519	0.489357	5.25284	2.34434	0.0236213	0.189681	-4.39873
ENSMUSG00000029036	Atad3a	0.35662	0.0236243	0.689616	3.77501	2.15812	0.0363953	0.23838	-4.39996
ENSMUSG00000028224	Nbn	0.37852	0.0179636	0.739076	3.38581	2.11555	0.0400576	0.250252	-4.40064
ENSMUSG00000030638	Sh3gl3	-0.25767	-0.47526	-0.040081	5.63421	-2.38635	0.0213662	0.178646	-4.40193
ENSMUSG00000031197	Vbp1	-0.205139	-0.372411	-0.0378663	6.73391	-2.47133	0.0173877	0.160055	-4.40198
ENSMUSG00000041028	Ghitm	0.208154	0.0421419	0.374166	7.80697	2.52669	0.0151704	0.150235	-4.40211
ENSMUSG00000024769	Cdc42bpg	0.42177	0.0190106	0.82453	3.31872	2.11027	0.0405339	0.251779	-4.40215
ENSMUSG00000031860	Pbx4	-0.423581	-0.83791	-0.00925095	3.03409	-2.06014	0.0453062	0.267629	-4.40357
ENSMUSG00000024948	Map4k2	-0.358145	-0.689991	-0.0262994	3.78532	-2.17486	0.035038	0.233516	-4.4037
ENSMUSG00000032320	Rcn2	-0.280131	-0.507569	-0.0526927	7.04919	-2.507	0.0173427	0.159899	-4.40642
ENSMUSG00000032867	Fbxw8	0.334852	0.0230325	0.646671	3.72235	2.164	0.035913	0.23679	-4.40668
ENSMUSG00000031993	Snx19	0.345077	0.025185	0.664969	3.91718	2.1738	0.035122	0.233643	-4.40805
ENSMUSG00000035189	Ano4	-0.483928	-0.937602	-0.0302544	3.75807	-2.16598	0.0372538	0.2416	-4.40929
ENSMUSG00000037916	Ndufv1	0.184748	0.0351992	0.334297	7.14087	2.48946	0.0166314	0.156595	-4.40931
ENSMUSG00000021044	Adck1	-0.313986	-0.603888	-0.0240836	3.92444	-2.18256	0.0344284	0.231035	-4.40945
ENSMUSG00000040147	Maob	-0.282234	-0.520698	-0.0437696	5.59188	-2.38611	0.0214513	0.178646	-4.41002
ENSMUSG00000005580	Adcy9	0.328289	0.0294233	0.627155	4.19682	2.21354	0.0320706	0.222601	-4.41002
ENSMUSG00000032076	Cadm1	0.182483	0.0375032	0.327462	8.18568	2.53643	0.0148082	0.148338	-4.41006
ENSMUSG00000068134	Zfp120	0.270612	0.0335044	0.507719	4.89539	2.2999	0.0262371	0.199957	-4.41052
ENSMUSG00000033955	Tnks1bp1	0.47504	0.0149308	0.935149	3.25295	2.08101	0.0433101	0.260997	-4.41201
@Çø}ENSMUSG00000025068	Gsto1	0.308939	0.0317874	0.58609	4.3951	2.24628	0.0297362	0.214222	-4.41361
ENSMUSG00000033007	Asic4	0.576016	-0.0159498	1.16798	2.49782	1.961	0.0562199	0.293646	-4.41448
ENSMUSG00000030879	Mrpl17	0.230632	0.0354845	0.425779	5.72108	2.38158	0.0216125	0.179767	-4.41792
ENSMUSG00000102742	Pcdhga11	-0.499328	-0.996324	-0.00233275	2.89914	-2.02461	0.0489797	0.276283	-4.42128
ENSMUSG00000020368	Canx	0.18285	0.0367083	0.328992	7.93551	2.52132	0.0153737	0.15169	-4.42131
ENSMUSG00000030435	U2af2	0.263956	0.0448915	0.48302	6.35957	2.43136	0.0193716	0.170074	-4.42183
ENSMUSG00000043300	B3galnt1	-0.314325	-0.593491	-0.0351598	4.66048	-2.26895	0.0282089	0.208055	-4.42495
ENSMUSG00000025060	Slk	0.223649	0.037734	0.409565	6.2596	2.42415	0.0195048	0.170788	-4.42601
ENSMUSG00000074405	Zfp865	0.448226	0.0073954	0.889057	3.10182	2.04896	0.0464359	0.270748	-4.42613
ENSMUSG00000003809	Gcdh	0.404314	0.00420242	0.804425	2.89424	2.03632	0.0477419	0.27336	-4.42681
ENSMUSG00000079641	Rpl39	-0.267417	-0.480789	-0.0540453	8.2794	-2.56088	0.015782	0.151991	-4.42918
ENSMUSG00000028954	Nub1	0.235906	0.039022	0.43279	6.14707	2.41455	0.0199632	0.172969	-4.42933
ENSMUSG00000035310	Lin54	0.379358	0.0174879	0.741229	3.49817	2.11254	0.0403288	0.251311	-4.42986
ENSMUSG00000024900	Cpt1a	0.293331	0.0274217	0.559241	4.31859	2.22296	0.0313828	0.220148	-4.43104
ENSMUSG00000070802	Pnmal2	0.247693	0.04871	0.446677	7.88548	2.52602	0.0161573	0.15375	-4.43283
ENSMUSG00000064254	Ethe1	0.405002	0.0080241	0.80198	3.23551	2.05588	0.0457337	0.26892	-4.43293
ENSMUSG00000042148	Cox10	0.266624	0.0361289	0.497118	5.2273	2.33102	0.02438	0.193882	-4.43327
ENSMUSG00000062995	Ica1	0.332941	0.0314253	0.634456	4.394	2.22518	0.0312228	0.219649	-4.43437
ENSMUSG00000018334	Ksr1	0.340895	0.0388501	0.64294	4.80587	2.27694	0.0278914	0.206899	-4.43446
ENSMUSG00000022664	Slc35a5	0.342976	0.037271	0.64868	4.64415	2.26186	0.028761	0.209802	-4.43461
ENSMUSG00000027333	Smox	0.28296	0.0402559	0.525665	5.37363	2.34939	0.0233393	0.188489	-4.43613
ENSMUSG00000008575	Nfib	0.186578	0.0384189	0.334738	8.5119	2.5377	0.0147617	0.148172	-4.43728
ENSMUSG00000052336	Cx3cr1	0.276578	0.0510015	0.502154	7.21897	2.49563	0.017814	0.162384	-4.43895
ENSMUSG00000019659	Ccdc12	0.334778	0.028297	0.64126	4.15603	2.20121	0.0329917	0.225664	-4.43995
ENSMUSG00000022521	Crebbp	0.181371	0.0348704	0.327873	7.54747	2.4948	0.0164141	0.155123	-4.44465
ENSMUSG00000002233	Rhoc	0.281138	0.0319619	0.530314	4.81408	2.27364	0.0279022	0.206899	-4.44471
ENSMUSG00000038429	Usp5	0.267864	0.0303404	0.505387	4.80886	2.27256	0.0279724	0.207109	-4.4462
ENSMUSG00000001755	Coasy	0.331861	0.020768	0.642954	3.91112	2.14968	0.0370969	0.241116	-4.44627
ENSMUSG00000032356	Rasgrf1	0.238293	0.0442087	0.432377	7.24404	2.47837	0.0173363	0.159899	-4.44716
ENSMUSG00000001089	Luzp1	0.214275	0.0337585	0.394791	6.01344	2.39201	0.021078	0.17755	-4.44836
ENSMUSG00000039834	Zfp335	-0.335601	-0.64316	-0.028042	4.11426	-2.19888	0.0331677	0.226397	-4.45031
ENSMUSG00000038690	Atp5j2	-0.210175	-0.376712	-0.0436375	8.92068	-2.54847	0.0146484	0.147485	-4.4514
ENSMUSG00000035245	Eogt	0.355834	0.0166963	0.694971	3.52296	2.11436	0.0401645	0.250761	-4.4523
ENSMUSG00000027884	Clcc1	0.287969	0.031737	0.5442	4.72257	2.26475	0.0284865	0.208416	-4.45424
ENSMUSG00000016181	Diexf	-0.412885	-0.816146	-0.00962395	3.20037	-2.06324	0.0449975	0.267252	-4.4567
ENSMUSG00000002489	Tiam1	0.226768	0.0379417	0.415594	6.42013	2.42006	0.0196988	0.171703	-4.45882
ENSMUSG00000057506	Bloc1s2	-0.405757	-0.799132	-0.0123828	3.33581	-2.07859	0.0434963	0.2618	-4.46102
ENSMUSG00000020042	Btbd11	0.397182	0.00785221	0.786511	3.11612	2.05579	0.0457427	0.26892	-4.46419
ENSMUSG00000020184	Mdm2	0.282575	0.0365801	0.52857	5.23954	2.31481	0.0253321	0.197012	-4.46575
ENSMUSG00000027406	Idh3b	-0.236077	-0.433157	-0.0389962	6.29184	-2.41389	0.0199952	0.172969	-4.46878
ENSMUSG00000016984	Etaa1	0.317689	0.0140117	0.621367	3.5419	2.10813	0.040728	0.252524	-4.46882
ENSMUSG00000049751	Rpl36al	0.395746	0.00459128	0.786901	3.22027	2.0388	0.0474823	0.272982	-4.47157
ENSMUSG00000025260	Hsd17b10	0.28244	0.0310772	0.533803	4.76417	2.26429	0.0285167	0.208483	-4.47187
ENSMUSG00000018379	Srsf1	-0.242144	-0.449939	-0.0343486	5.51859	-2.34826	0.0234025	0.188691	-4.47194
ENSMUSG00000032940	Rbm11	0.42726	-0.00592765	0.860448	2.71469	1.98758	0.0530805	0.284006	-4.47353
ENSMUSG00000036095	Dgkb	0.204942	0.040364	0.369519	8.19494	2.50938	0.0158344	0.152254	-4.47388
ENSMUSG00000037007	Zfp113	0.341578	0.0236326	0.659524	4.06679	2.16494	0.0358369	0.236763	-4.47419
ENSMUSG00000021756	Il6st	0.314027	0.0415923	0.586461	5.3405	2.33058	0.0249732	0.195918	-4.47718
ENSMUSG00000052364	RP23-245M18.4	-0.293614	-0.55832	-0.0289093	4.55754	-2.23523	0.0305064	0.216771	-4.47766
ENSMUSG00000022681	Ntan1	-0.255826	-0.474693	-0.0369591	5.62819	-2.35544	0.0230056	0.186404	-4.47775
ENSMUSG00000024732	Ccdc86	0.352009	0.0139605	0.690058	3.58494	2.09837	0.0416249	0.255677	-4.47843
ENSMUSG00000060227	Casc4	0.226133	0.0358852	0.416381	6.27543	2.39526	0.0209139	0.17755	-4.48039
ENSMUSG00000016554	Eif3d	0.277479	0.0354575	0.519501	5.30966	2.31038	0.0255979	0.198143	-4.48099
ENSMUSG00000030002	Dusp11	0.299375	0.0268575	0.571893	4.36554	2.21375	0.0320553	0.222601	-4.48135
ENSMUSG00000021271	Zfp839	0.3893	-0.00191447	0.780514	3.01441	2.00529	0.0510834	0.279726	-4.48523
ENSMUSG00000039154	Shd	-0.524489	-1.06702	0.0180403	2.4619	-1.94814	0.0577698	0.298926	-4.48554
ENSMUSG00000028187	Rpf1	0.391336	0.00203955	0.780633	3.06311	2.02571	0.0488623	0.276283	-4.4874
ENSMUSG00000038671	Arfrp1	0.272787	0.0352216	0.510353	5.30818	2.31392	0.0253854	0.197116	-4.48842
ENSMUSG00000041907	Gpr45	0.318608	0.0246402	0.612576	4.2728	2.18406	0.0343108	0.231035	-4.49001
ENSMUSG00000045180	Shroom2	0.233544	0.0328489	0.434238	5.73257	2.34498	0.0235853	0.189628	-4.49613
ENSMUSG00000046240	Hepacam	0.232174	0.0376325	0.426716	6.35106	2.40496	0.0204305	0.175167	-4.49617
ENSMUSG00000032231	Anxa2	0.561083	-0.0220896	1.14426	2.59421	1.94155	0.0589094	0.302549	-4.49658
ENSMUSG00000025545	Clybl	0.261033	0.0338579	0.488208	5.43025	2.31549	0.0252916	0.196852	-4.49737
ENSMUSG00000055148	Klf2	0.366835	0.0289022	0.704769	4.36265	2.18939	0.0340627	0.23062	-4.49889
ENSMUSG00000020570	Sypl	0.238725	0.0292648	0.448185	5.22838	2.2967	0.0264353	0.201002	-4.49991
ENSMUSG00000017291	Taok1	0.184941	0.036893	0.332989	8.72863	2.51732	0.0155268	0.15169	-4.49995
ENSMUSG00000021054	Sgpp1	-0.310244	-0.593726	-0.0267628	4.34413	-2.2054	0.0326763	0.224027	-4.49996
ENSMUSG00000037366	Pafah2	0.377987	0.0080551	0.74792	3.38806	2.05903	0.0454177	0.267975	-4.50231
ENSMUSG00000015656	Hspa8	0.279879	0.0446477	0.51511	6.45916	2.41305	0.021038	0.17755	-4.50352
ENSMUSG00000036634	Mag	0.415004	0.0514157	0.778593	5.6225	2.35586	0.0269939	0.203371	-4.50686
ENSMUSG00000052397	Ezr	0.198501	0.0374859	0.359517	7.92806	2.4843	0.0168435	0.157541	-4.50747
ENSMUSG00000036879	Phkb	0.214038	0.0325408	0.395535	6.08427	2.37645	0.0218795	0.180387	-4.50794
ENSMUSG00000020037	Rfx4	0.316841	0.0283074	0.605374	4.53723	2.21285	0.0321215	0.222643	-4.51143
ENSMUSG00000027574	Nkain4	-0.580451	-1.13111	-0.0297881	4.00712	-2.18422	0.0397261	0.250154	-4.51267
ENSMUSG00000053510	Nrd1	0.224505	0.0323721	0.416637	5.90582	2.35468	0.0230473	0.186436	-4.51463
ENSMUSG00000027620	Rbm39	0.233005	0.0420484	0.423961	7.49629	2.46526	0.0180289	0.163368	-4.51523
ENSMUSG00000006998	Psmd2	0.202167	0.0354375	0.368896	7.12823	2.44346	0.0186117	0.16636	-4.51568
ENSMUSG00000046791	RP24-185O19.6	0.344367	0.0205224	0.668212	4.16007	2.14285	0.0376731	0.24336	-4.51969
ENSMUSG00000059708	Akap17b	0.305417	0.0234319	0.587402	4.3063	2.1826	0.034425	0.231035	-4.52075
ENSMUSG00000006304	Arpc2	0.15703	0.0304108	0.283649	8.51603	2.49914	0.0162396	0.153933	-4.52224
ENSMUSG00000047632	Fgfbp3	-0.441245	-0.901878	0.0193867	2.63802	-1.93034	0.0600011	0.305952	-4.52226
ENSMUSG00000026893	Gca	-0.356278	-0.704819	-0.00773756	3.42089	-2.05989	0.0453319	0.267629	-4.52296
ENSMUSG00000062184	Hs6st2	-0.261124	-0.487103	-0.0351448	5.58851	-2.32855	0.0245226	0.194322	-4.52392
ENSMUSG00000024911	Fibp	-0.273997	-0.518027	-0.0299666	5.08077	-2.26261	0.0286289	0.208993	-4.52715
ENSMUSG00000050605	Zfp61	-0.428081	-0.863428	0.00726666	2.95241	-1.98152	0.0537791	0.286658	-4.52728
ENSMUSG00000022016	Akap11	0.203285	0.0366804	0.369889	7.54035	2.45882	0.017928	0.162902	-4.52734
ENSMUSG00000019814	Ltv1	0.447793	0.00216037	0.893425	3.2306	2.02492	0.0489465	0.276283	-4.53123
ENSMUSG00000021242	Npc2	0.18322	0.0318576	0.334582	7.22943	2.43929	0.0188016	0.167451	-4.53159
ENSMUSG00000018765	Fxr2	0.238932	0.0355746	0.442289	6.21523	2.36767	0.0223437	0.182237	-4.53213
ENSMUSG00000020088	Sar1a	0.269814	0.0298328	0.509795	5.04801	2.26566	0.0284261	0.208282	-4.5339
ENSMUSG00000045917	RP23-230C2.2	0.460081	-0.00512896	0.925292	3.12599	1.99293	0.0524694	0.283191	-4.53391
ENSMUSG00000016833	Mrps18c	-0.197688	-0.36452	-0.0308555	6.36981	-2.38785	0.0212894	0.17835	-4.53414
ENSMUSG00000051243	Islr2	0.322786	0.0256108	0.619961	4.55144	2.18882	0.0339402	0.23008	-4.53783
ENSMUSG00000058886	Deaf1	-0.275413	-0.526962	-0.023865	4.52249	-2.20633	0.0326061	0.223801	-4.54161
ENSMUSG00000021051	Ppp2r5e	0.207755	0.0316221	0.383888	6.36508	2.37694	0.0218538	0.180325	-4.54429
ENSMUSG00000109336	Samd4b	0.233498	0.0392262	0.427771	6.96165	2.42485	0.0196503	0.171542	-4.54546
ENSMUSG00000006818	Sod2	0.195021	0.0299258	0.360116	6.33342	2.38043	0.0216721	0.179879	-4.54548
ENSMUSG00000063849	Ppcdc	0.384987	0.00583969	0.764134	3.60051	2.04619	0.0467192	0.271439	-4.55053
ENSMUSG00000020641	Rsad2	0.577988	-0.0194824	1.17546	2.96424	1.96662	0.0575062	0.298099	-4.55317
ENSMUSG00000052105	Mtcl1	0.278012	0.0245632	0.531461	4.69849	2.21045	0.0322993	0.223381	-4.55405
ENSMUSG00000034290	Nek9	0.218329	0.0318671	0.404792	6.09452	2.35955	0.0227815	0.185043	-4.55406
ENSMUSG00000090733	Rps27	-0.238057	-0.428206	-0.0479073	9.87595	-2.55966	0.0159082	0.152254	-4.5545
ENSMUSG00000015829	Tnr	0.2711	0.0363854	0.505816	5.81989	2.32951	0.0246108	0.194465	-4.55648
ENSMUSG00000048978	Nrsn1	-0.169248	-0.30399	-0.0345063	9.91784	-2.53122	0.0150012	0.149062	-4.55708
ENSMUSG00000040713	Creg1	0.275274	0.025835	0.524714	4.84865	2.22387	0.0313175	0.220002	-4.55775
ENSMUSG00000025950	Idh1	-0.252603	-0.475051	-0.0301546	5.36865	-2.28832	0.02696	0.203292	-4.56194
ENSMUSG00000023007	Prpf40b	-0.335466	-0.654695	-0.0162364	3.94598	-2.11764	0.0398701	0.250154	-4.56439
ENSMUSG00000051497	Kcnj16	0.271506	0.0387617	0.504251	6.13386	2.35833	0.0233792	0.188657	-4.56588
ENSMUSG00000020485	Supt4a	-0.345412	-0.674048	-0.0167759	3.96909	-2.11802	0.0398367	0.250154	-4.56594
ENSMUSG00000022682	Rrn3	0.272422	0.0286962	0.516147	5.20491	2.25241	0.0293157	0.212281	-4.57146
ENSMUSG00000061130	Ppm1b	0.185752	0.0315323	0.339972	7.3765	2.42718	0.0193625	0.170074	-4.57183
ENSMUSG00000010554	Mettl16	0.2621	0.0249928	0.499207	4.92818	2.22756	0.0310516	0.219318	-4.57229
ENSMUSG00000017221	Psmd3	0.259688	0.0296174	0.489759	5.41348	2.27457	0.0278417	0.206762	-4.57494
ENSMUSG00000034839	Larp6	0.362424	0.0154505	0.709398	4.11376	2.10488	0.0410244	0.253406	-4.57516
ENSMUSG00000048911	Rnf24	0.26417	0.0255275	0.502812	4.9621	2.23071	0.0308267	0.218419	-4.57537
ENSMUSG00000032330	Cox7a2	-0.212399	-0.382075	-0.0427228	10.0753	-2.54289	0.0156578	0.151991	-4.57573
ENSMUSG00000039844	Rapgef1	0.240499	0.0416167	0.43938	7.70666	2.45126	0.0191468	0.169423	-4.57694
ENSMUSG00000079055	Slc8a3	0.464208	-0.0272385	0.955655	2.70668	1.90346	0.0635095	0.313869	-4.57737
ENSMUSG00000015766	Eps8	0.272635	0.0349635	0.510307	5.72275	2.31359	0.0255538	0.19807	-4.57873
ENSMUSG00000073889	Il11ra1	0.266496	0.0296018	0.503391	5.34404	2.26696	0.0283402	0.208055	-4.58073
ENSMUSG00000030088	Aldh1l1	0.276035	0.0291071	0.522962	5.1136	2.25269	0.0292968	0.212281	-4.58178
ENSMUSG00000030105	Arl8b	0.192666	0.0302657	0.355067	6.73585	2.3907	0.0211441	0.17755	-4.58269
ENSMUSG00000050312	Nsun3	0.412454	-0.00368618	0.828595	3.1517	1.9973	0.0519759	0.282361	-4.58413
ENSMUSG00000066406	Akap13	-0.252504	-0.476939	-0.0280693	5.30131	-2.26718	0.0283257	0.208055	-4.5845
ENSMUSG00000024892	Pcx	0.295204	0.0278694	0.562539	4.99557	2.22523	0.0312192	0.219649	-4.58522
ENSMUSG00000020590	Snx13	-0.226967	-0.422685	-0.0312492	6.02396	-2.3369	0.0240424	0.19197	-4.5859
ENSMUSG00000067847	Romo1	-0.175673	-0.320552	-0.0307949	7.8897	-2.44349	0.0186105	0.16636	-4.58865
ENSMUSG00000029466	Anapc7	0.342806	0.00392164	0.681691	3.62462	2.03847	0.0475171	0.272982	-4.58936
ENSMUSG00000002658	Gtf2f1	0.323184	0.0159669	0.6304	4.2089	2.11988	0.0396705	0.250154	-4.59147
ENSMUSG00000036398	Ppp1r11	0.217478	0.0341849	0.40077	6.89079	2.39099	0.0211297	0.17755	-4.59171
ENSMUSG00000021974	Fgf9	-0.273276	-0.529498	-0.0170541	4.37148	-2.14928	0.0371304	0.241116	-4.59275
ENSMUSG00000061136	Prpf40a	0.217227	0.0329911	0.401463	6.59353	2.376	0.0219029	0.180408	-4.59328
ENSMUSG00000030930	Chst15	0.305914	0.0198706	0.591958	4.42977	2.15514	0.0366416	0.239358	-4.5935
ENSMUSG00000028049	Scamp3	0.310656	0.0267456	0.594566	4.96574	2.20499	0.032707	0.224027	-4.59491
ENSMUSG00000056076	Eif3b	0.266077	0.0271576	0.504996	5.05585	2.24421	0.0298789	0.214628	-4.59505
ENSMUSG00000003421	Nosip	0.3724	0.00930043	0.7355	3.85993	2.06677	0.0446488	0.266463	-4.59519
ENSMUSG00000040865	Ino80d	0.256537	0.0268753	0.486199	5.25366	2.25097	0.0294143	0.212514	-4.59547
ENSMUSG00000035067	Xkr6	0.377872	0.00599993	0.749745	3.71167	2.04766	0.0465681	0.271039	-4.59671
ENSMUSG00000024411	Aqp4	-0.258344	-0.476099	-0.0405894	7.06932	-2.40752	0.0214036	0.178646	-4.60057
ENSMUSG00000019971	Cep290	0.258326	0.0255978	0.491055	5.17104	2.2368	0.0303961	0.216299	-4.60156
ENSMUSG00000092417	Gpank1	0.281388	0.0151859	0.547589	4.24143	2.13011	0.0387702	0.247432	-4.60207
ENSMUSG00000031216	Stard8	-0.275319	-0.530988	-0.0196508	4.48972	-2.17004	0.0354241	0.234821	-4.60282
ENSMUSG00000023262	Acy1	0.422377	0.00666777	0.838087	3.7786	2.05142	0.0465977	0.271052	-4.60296
ENSMUSG00000079508	Apoo	-0.401057	-0.802033	-8.07817e-05	3.37637	-2.01556	0.0499558	0.278284	-4.60483
ENSMUSG00000018707	Dync1h1	0.280861	0.0433932	0.518328	7.13406	2.41152	0.0219551	0.180408	-4.60615
ENSMUSG00000028557	Rnf11	-0.173697	-0.315827	-0.0315665	8.60293	-2.46271	0.0177584	0.162256	-4.61051
ENSMUSG00000029156	Sgcb	-0.276453	-0.531903	-0.0210041	4.67844	-2.18085	0.0345633	0.231288	-4.61094
ENSMUSG00000029413	Naaa	-0.416101	-0.818777	-0.0134252	3.99426	-2.09214	0.0431848	0.260607	-4.61344
ENSMUSG00000031349	Nsdhl	-0.28116	-0.546282	-0.0160372	4.39407	-2.13705	0.0381695	0.245588	-4.61489
ENSMUSG00000040524	Zfp609	0.253703	0.025729	0.481678	5.24307	2.24258	0.0299921	0.214972	-4.61521
ENSMUSG00000002524	Puf60	0.218614	0.032733	0.404496	6.75022	2.37001	0.0222193	0.182079	-4.61751
ENSMUSG00000036561	Ppp6r2	-0.385746	-0.767075	-0.00441733	3.63252	-2.03849	0.0475146	0.272982	-4.62015
ENSMUSG00000055485	Soga1	0.419263	-0.0323597	0.870885	2.67779	1.87076	0.0680128	0.325782	-4.62263
ENSMUSG00000038268	Ovca2	0.351811	-0.00126334	0.704885	3.55175	2.00794	0.0507902	0.278989	-4.62271
ENSMUSG00000098188	Sowahc	0.394534	-0.0202616	0.809329	2.94063	1.91672	0.061758	0.310108	-4.62349
ENSMUSG00000041977	Arhgef11	0.403078	-0.016181	0.822337	3.05216	1.93738	0.0591103	0.302975	-4.62383
ENSMUSG00000003500	Impdh1	0.35693	-0.00110442	0.714965	3.5433	2.00894	0.0506805	0.278989	-4.62511
ENSMUSG00000039725	Trp53rka	0.265238	0.0180804	0.512396	4.50128	2.16257	0.03603	0.23693	-4.62675
ENSMUSG00000029313	Aff1	0.385081	-0.0102327	0.780394	3.00388	1.96299	0.0559641	0.292964	-4.627
ENSMUSG00000047824	Pygo2	0.247057	0.0249895	0.469124	5.28639	2.24192	0.030038	0.214989	-4.62761
ENSMUSG00000030268	Bcat1	0.309376	0.0168218	0.601929	4.33471	2.13102	0.0386906	0.247344	-4.62906
ENSMUSG00000036959	Bcorl1	0.302269	0.01668	0.587858	4.38612	2.13285	0.0385321	0.24706	-4.63304
ENSMUSG00000025220	Mgea5	0.182371	0.028844	0.335898	7.2308	2.39375	0.0209898	0.17755	-4.63348
ENSMUSG00000026021	Sumo1	-0.232263	-0.440272	-0.0242544	5.32756	-2.25012	0.029472	0.212514	-4.63531
ENSMUSG00000019373	Cops3	-0.309342	-0.597754	-0.0209308	4.54015	-2.1614	0.0361258	0.237086	-4.63575
ENSMUSG00000058325	Dock1	-0.278157	-0.530878	-0.0254362	5.05914	-2.21797	0.0317453	0.221276	-4.63706
ENSMUSG00000001542	Ell2	-0.295025	-0.572743	-0.0173075	4.50021	-2.14074	0.0378535	0.244205	-4.63838
ENSMUSG00000024048	Myl12a	0.295789	0.0268632	0.564714	5.08069	2.2168	0.0318613	0.221683	-4.63873
ENSMUSG00000004558	Ndrg2	-0.168384	-0.303674	-0.0330934	10.4092	-2.50808	0.0158856	0.152254	-4.64015
ENSMUSG00000049439	Cyp20a1	0.344614	0.00258161	0.686646	3.66425	2.03036	0.0483681	0.27535	-4.64053
ENSMUSG00000022420	Dnal4	-0.299277	-0.578137	-0.0204169	4.6563	-2.16269	0.0360198	0.23693	-4.64106
ENSMUSG00000089809	Rasgef1b	0.255862	0.0260224	0.485702	5.34399	2.24331	0.0299416	0.214766	-4.64486
ENSMUSG00000030786	Itgam	0.442293	-0.00573234	0.890317	3.44996	1.99351	0.0528661	0.283474	-4.6467
ENSMUSG00000026463	Atp2b4	0.225943	0.0337056	0.418181	7.01642	2.36918	0.0223121	0.182129	-4.64782
ENSMUSG00000000058	Cav2	-0.280465	-0.54554	-0.0153908	4.43079	-2.13216	0.0385921	0.247195	-4.64796
ENSMUSG00000019232	Etnppl	-0.630498	-1.20927	-0.0517236	5.34748	-2.29371	0.0344552	0.231035	-4.64862
ENSMUSG00000025616	Usp16	0.27882	0.0263938	0.531246	5.22234	2.22586	0.0311741	0.219619	-4.64882
ENSMUSG00000026288	Inpp5d	0.435375	-0.0296398	0.900389	2.70861	1.88671	0.065784	0.31913	-4.65067
ENSMUSG00000022200	Golph3	0.216386	0.0276127	0.405158	6.12471	2.30992	0.025626	0.198201	-4.65427
ENSMUSG00000001441	Npepps	0.179473	0.0274337	0.331512	7.17174	2.37876	0.0217587	0.180143	-4.65552
ENSMUSG00000055116	Arntl	-0.326032	-0.640329	-0.0117361	4.0916	-2.0904	0.0423703	0.258328	-4.65568
ENSMUSG00000027546	Atp9a	0.221245	0.036962	0.405527	8.14496	2.42824	0.0198766	0.172666	-4.65643
ENSMUSG00000025579	Gaa	0.317308	0.0218449	0.612771	4.74832	2.16496	0.0359094	0.23679	-4.65767
ENSMUSG00000029775	Klhdc10	0.236576	0.0230233	0.450129	5.33179	2.23241	0.0307063	0.217878	-4.65909
NÇ±}ENSMUSG00000018381	Abi3	0.398003	-0.0188411	0.814846	3.22532	1.92407	0.0608046	0.307352	-4.65911
ENSMUSG00000037622	Wdtc1	0.228114	0.0264997	0.429729	5.82632	2.28002	0.0274892	0.206002	-4.65948
ENSMUSG00000022325	Pop1	0.498154	-0.0439986	1.04031	2.62056	1.85161	0.0707741	0.331957	-4.65988
ENSMUSG00000019055	Plod1	0.43575	-0.0237663	0.895267	2.96967	1.91093	0.0625178	0.311924	-4.66024
ENSMUSG00000024867	Pip5k1b	-0.431883	-0.890288	0.0265218	2.94033	-1.89856	0.0641676	0.315787	-4.66366
ENSMUSG00000023923	Tbc1d5	0.2437	0.0197689	0.467631	4.97946	2.19305	0.0336134	0.228179	-4.66391
ENSMUSG00000041958	Pigs	0.320266	-0.00118617	0.641717	3.73783	2.00772	0.050815	0.278989	-4.66532
ENSMUSG00000023961	Enpp4	0.310753	0.0203758	0.60113	4.86368	2.15655	0.0365243	0.238795	-4.67035
ENSMUSG00000001289	Pfdn5	-0.216138	-0.395694	-0.0365823	8.44974	-2.43512	0.0195827	0.171318	-4.67239
ENSMUSG00000020380	Rad50	0.293936	0.023084	0.564788	5.00772	2.1869	0.0340894	0.23062	-4.67499
ENSMUSG00000054934	Kcnmb4	-0.208879	-0.38781	-0.0299485	6.81361	-2.35244	0.0231708	0.187282	-4.67521
ENSMUSG00000097239	RP23-124N11.3	0.554524	-0.0736237	1.18267	2.34756	1.77949	0.0821139	0.355875	-4.6776
ENSMUSG00000033805	Ephx4	-0.356831	-0.707873	-0.00578992	3.91214	-2.04839	0.046494	0.270927	-4.67934
ENSMUSG00000026956	Uap1l1	0.351446	-0.0020442	0.704936	3.73563	2.0035	0.0512824	0.280284	-4.67962
ENSMUSG00000063172	Hspb11	-0.320518	-0.6275	-0.0135361	4.25337	-2.10401	0.0411049	0.253587	-4.67985
ENSMUSG00000042606	Hirip3	0.290091	0.0107305	0.569452	4.22856	2.09255	0.0421675	0.257472	-4.68458
ENSMUSG00000020102	Slc16a7	-0.385754	-0.784357	0.0128489	3.29108	-1.95019	0.0575175	0.298099	-4.68747
ENSMUSG00000008035	Mid1ip1	0.172283	0.0263933	0.318173	7.46166	2.37972	0.0217089	0.179881	-4.68851
ENSMUSG00000029505	Ep400	0.250203	0.0218424	0.478563	5.19508	2.2079	0.0324892	0.223582	-4.68948
ENSMUSG00000047539	Fbxo28	0.255888	0.0178002	0.493975	4.94226	2.16581	0.0357658	0.236763	-4.68954
ENSMUSG00000010936	Vac14	0.425735	-0.0376136	0.889083	2.67062	1.85157	0.0707808	0.331957	-4.68957
ENSMUSG00000003534	Ddr1	0.258123	0.0286961	0.487551	5.92185	2.26806	0.0283358	0.208055	-4.69081
ENSMUSG00000039018	Mtg1	0.381727	-0.0168215	0.780275	3.15873	1.9301	0.0600319	0.305952	-4.69116
ENSMUSG00000031546	Gins4	0.353669	-0.00153549	0.708873	3.66251	2.00644	0.050956	0.279451	-4.69131
ENSMUSG00000056665	Them6	0.459541	-0.036041	0.955122	2.93022	1.8686	0.0683198	0.326097	-4.69164
ENSMUSG00000050199	Lgr4	-0.31341	-0.614822	-0.0119988	4.25581	-2.09537	0.0419039	0.256668	-4.694
ENSMUSG00000056501	Cebpb	0.554562	-0.0859759	1.1951	2.1379	1.74467	0.0879981	0.366578	-4.69446
ENSMUSG00000031796	Cfap20	-0.389345	-0.7762	-0.00248988	3.77353	-2.03097	0.0486085	0.276283	-4.69509
ENSMUSG00000059890	Ube4a	0.422043	-0.0102792	0.854366	3.55167	1.96908	0.0554484	0.291156	-4.69515
ENSMUSG00000047409	Ctdspl	0.24611	0.0221979	0.470022	5.36623	2.21493	0.0319687	0.222206	-4.69727
ENSMUSG00000031010	Usp9x	0.247474	0.018999	0.475949	5.08781	2.18272	0.0344156	0.231035	-4.69785
ENSMUSG00000036707	Cab39	0.194631	0.0271756	0.362086	6.86124	2.34218	0.0237428	0.190289	-4.69973
ENSMUSG00000000326	Comt	0.228999	0.0273983	0.430599	6.19972	2.28902	0.0269159	0.203292	-4.70003
ENSMUSG00000020132	Rab21	0.188272	0.0254303	0.351114	6.68169	2.32985	0.0244475	0.194118	-4.70108
ENSMUSG00000042524	Sun2	0.382252	0.0028715	0.761633	3.94747	2.03272	0.0483665	0.27535	-4.7014
ENSMUSG00000027248	Pdia3	0.242067	0.0235916	0.460542	5.66534	2.23275	0.0306817	0.21786	-4.70253
ENSMUSG00000109901	Chmp1b	0.298866	0.0112694	0.586463	4.34148	2.09411	0.0420214	0.256835	-4.70441
ENSMUSG00000015846	Rxra	0.340798	3.39904e-05	0.681563	3.7849	2.01535	0.0499781	0.278284	-4.70511
ENSMUSG00000019975	Ikbip	-0.343592	-0.687506	0.000321496	3.79555	-2.01327	0.0502054	0.278606	-4.70772
ENSMUSG00000031775	Pllp	0.289411	0.0131449	0.565677	4.63467	2.11103	0.0404646	0.251779	-4.71057
ENSMUSG00000030795	Fus	0.224337	0.0357338	0.41294	8.30556	2.41102	0.021051	0.17755	-4.71372
ENSMUSG00000056999	Ide	0.354968	0.0229849	0.686952	4.89683	2.17518	0.0368659	0.240346	-4.71396
ENSMUSG00000071341	Egr4	0.395311	0.000672012	0.78995	3.96203	2.0237	0.0496292	0.277569	-4.71698
ENSMUSG00000015189	Casd1	0.282291	0.017818	0.546764	4.93248	2.15092	0.0369933	0.240826	-4.71739
ENSMUSG00000033047	Eif3l	0.205909	0.0228563	0.388962	6.01316	2.26677	0.0283529	0.208055	-4.72009
ENSMUSG00000109865	Hspa14	0.280702	0.0135009	0.547902	4.60092	2.11697	0.0399303	0.250154	-4.72078
ENSMUSG00000029249	Rest	0.37837	-0.0114543	0.768194	3.55749	1.95594	0.0568154	0.295661	-4.7229
ENSMUSG00000028998	Tomm7	-0.177599	-0.325866	-0.0293317	8.70843	-2.41381	0.0199991	0.172969	-4.72588
ENSMUSG00000007891	Ctsd	0.180063	0.0239202	0.336207	6.8317	2.32386	0.0247963	0.195306	-4.72707
ENSMUSG00000091002	Tcerg1l	-0.444074	-0.93143	0.0432814	2.74209	-1.83619	0.0730665	0.337075	-4.7279
ENSMUSG00000069206	Zfp874a	-0.383801	-0.795386	0.0277827	3.07824	-1.87912	0.0668359	0.322648	-4.728
ENSMUSG00000006356	Crip2	0.194525	0.0301832	0.358867	8.02007	2.38526	0.0214225	0.178646	-4.72801
ENSMUSG00000001785	Pwp1	0.368326	-0.00709133	0.743743	3.6662	1.97709	0.0542946	0.288006	-4.72956
ENSMUSG00000022100	Xpo7	0.223169	0.0249123	0.421426	6.06056	2.26837	0.0282473	0.208055	-4.72959
ENSMUSG00000018537	Pcgf2	0.452456	-0.019164	0.924077	3.50379	1.94038	0.0595738	0.304463	-4.72969
ENSMUSG00000041225	Arhgap12	0.222356	0.0210963	0.423615	5.57723	2.22638	0.0311362	0.21957	-4.72973
ENSMUSG00000031924	Cyb5b	0.171068	0.0255928	0.316543	7.66744	2.36967	0.0222375	0.182079	-4.73061
ENSMUSG00000035621	Midn	0.268595	0.027261	0.509929	5.86615	2.2471	0.030033	0.214989	-4.7315
ENSMUSG00000040022	Rab11fip2	0.231007	0.0266479	0.435367	6.23584	2.27792	0.0276243	0.206544	-4.73213
ENSMUSG00000029141	Slc4a1ap	0.319442	0.0115936	0.627291	4.55378	2.09104	0.0423097	0.258118	-4.734
ENSMUSG00000032883	Acsl3	-0.1817	-0.334764	-0.0286355	8.26755	-2.39215	0.0210707	0.17755	-4.73421
ENSMUSG00000040490	Lrfn2	0.449614	-0.059413	0.958641	2.47269	1.77995	0.0819654	0.355543	-4.73525
ENSMUSG00000073468	Sft2d1	-0.650819	-1.32496	0.0233196	3.61732	-2.0138	0.0576809	0.298749	-4.73584
ENSMUSG00000000563	Atp5f1	-0.182064	-0.33554	-0.0285879	8.24102	-2.39051	0.0211537	0.17755	-4.73669
ENSMUSG00000038128	Camk4	0.185215	0.026039	0.34439	7.19364	2.3448	0.0235955	0.189628	-4.73714
ENSMUSG00000018160	Med1	0.214824	0.0241483	0.405501	6.13975	2.27036	0.0281162	0.208018	-4.73762
ENSMUSG00000050708	Ftl1	-0.46186	-0.93201	0.00828995	3.75778	-2.00104	0.0539329	0.287013	-4.73864
ENSMUSG00000018102	Hist1h2bc	-0.224441	-0.420491	-0.0283908	6.5893	-2.30697	0.0258042	0.198963	-4.7393
ENSMUSG00000037820	Tgm2	0.427905	-0.0408346	0.896644	2.79122	1.8396	0.0725541	0.335338	-4.74039
ENSMUSG00000039286	Fndc3b	0.28412	0.0112983	0.556943	4.58739	2.0986	0.0416033	0.255677	-4.74085
ENSMUSG00000023909	Paqr4	0.226604	0.0219112	0.431296	5.7877	2.23086	0.030816	0.218419	-4.74168
ENSMUSG00000024826	Dpf2	0.33449	0.00389003	0.66509	4.04736	2.03886	0.0474763	0.272982	-4.74244
ENSMUSG00000044986	Tst	-0.40852	-0.85102	0.0339791	2.90655	-1.86041	0.0694938	0.328731	-4.74599
ENSMUSG00000037470	Uggt1	0.2888	0.010931	0.566669	4.54326	2.09442	0.0419924	0.256831	-4.74676
ENSMUSG00000025465	Echs1	0.238058	0.0242125	0.451904	5.91877	2.24332	0.029941	0.214766	-4.74756
ENSMUSG00000026788	Zbtb43	0.270628	0.0129337	0.528323	4.70148	2.11629	0.0399911	0.250154	-4.74848
ENSMUSG00000027193	Api5	0.239095	0.0207758	0.457413	5.48995	2.20692	0.0325624	0.22366	-4.74981
ENSMUSG00000011257	Pabpc4	0.263491	0.0205728	0.506408	5.25788	2.18582	0.0341736	0.23062	-4.75095
ENSMUSG00000031358	Msl3	0.270673	0.00927679	0.53207	4.58918	2.08667	0.0427231	0.259536	-4.75097
ENSMUSG00000060938	Rpl26	-0.20549	-0.377163	-0.0338177	9.08097	-2.42216	0.0202415	0.174303	-4.751
ENSMUSG00000003955	Fam162a	-0.204113	-0.385687	-0.022539	6.11063	-2.26529	0.0284503	0.208305	-4.75308
ENSMUSG00000042272	Sestd1	0.28449	0.0079097	0.56107	4.44129	2.07278	0.044059	0.26365	-4.754
ENSMUSG00000079658	Eloc	-0.206704	-0.384588	-0.0288192	7.29491	-2.34163	0.0237741	0.190289	-4.75523
ENSMUSG00000051146	Camk2n2	-0.204649	-0.383512	-0.0257866	6.68878	-2.30567	0.0258833	0.199259	-4.75564
ENSMUSG00000058297	Spock2	0.177864	0.0251357	0.330593	7.50693	2.3468	0.0234837	0.189037	-4.75673
ENSMUSG00000030538	Cib1	0.322328	0.00158058	0.643075	3.96405	2.02508	0.0489293	0.276283	-4.75703
ENSMUSG00000054723	Vmac	-0.496906	-1.05413	0.0603211	2.6098	-1.79822	0.0791431	0.349935	-4.75864
ENSMUSG00000032966	Fkbp1a	0.165628	0.0261401	0.305115	8.55848	2.39279	0.0210382	0.17755	-4.75892
ENSMUSG00000037904	Ankrd9	0.406115	-0.0318701	0.844101	3.14976	1.86852	0.0683314	0.326097	-4.75906
ENSMUSG00000003208	Ccdc94	0.638683	-0.107994	1.38536	2.42082	1.74153	0.0910858	0.374369	-4.75952
ENSMUSG00000041057	Wdr43	0.240205	0.018036	0.462373	5.32161	2.17874	0.0347291	0.23224	-4.76215
ENSMUSG00000007670	Khsrp	0.236247	0.0216442	0.45085	5.66838	2.21839	0.0317148	0.221276	-4.76234
ENSMUSG00000029502	Golga3	0.339519	-0.00389818	0.682936	3.93191	1.99228	0.052544	0.283298	-4.76358
ENSMUSG00000006215	Zbtb17	-0.284249	-0.564546	-0.00395194	4.19449	-2.04356	0.0469894	0.272462	-4.76363
ENSMUSG00000034595	Ppp1r18	0.326131	-0.00295161	0.655214	3.89741	1.99708	0.0520011	0.282361	-4.76731
ENSMUSG00000004880	Lbr	-0.383585	-0.795997	0.0288264	3.0702	-1.8743	0.067513	0.324017	-4.76945
ENSMUSG00000053253	Ndfip2	-0.213007	-0.399252	-0.0267621	6.80928	-2.30471	0.0259419	0.199388	-4.76946
ENSMUSG00000032869	Psmf1	0.294428	0.0102943	0.578561	4.61954	2.08816	0.0425815	0.258977	-4.76946
ENSMUSG00000021660	Btf3	0.490321	-0.0637445	1.04439	2.57058	1.7835	0.0814031	0.354193	-4.77301
ENSMUSG00000022710	Usp7	0.187056	0.0245403	0.349572	7.13851	2.31944	0.0250565	0.196259	-4.77606
ENSMUSG00000054237	Fra10ac1	0.33094	0.0029398	0.658939	4.33594	2.03321	0.0480674	0.274529	-4.77868
ENSMUSG00000059146	Ntrk3	0.210082	0.0248034	0.395361	6.64397	2.28492	0.0271756	0.203962	-4.77958
ENSMUSG00000046603	Tcaim	0.242903	0.0130771	0.47273	5.02528	2.12981	0.0387959	0.247432	-4.78165
ENSMUSG00000019943	Atp2b1	0.217443	0.0347412	0.400145	9.21278	2.41947	0.0210921	0.17755	-4.78401
ENSMUSG00000044365	Cxxc4	-0.276578	-0.536545	-0.0166114	5.02916	-2.14392	0.0375829	0.243095	-4.7853
ENSMUSG00000021671	Poc5	0.292669	0.00205528	0.583283	4.17669	2.0294	0.0484696	0.275768	-4.78533
ENSMUSG00000023391	Dlx2	-0.464094	-0.996745	0.0685559	2.44632	-1.75579	0.0860579	0.36309	-4.78608
ENSMUSG00000022544	Eef2kmt	0.409618	-0.0427695	0.862006	3.01315	1.82464	0.0748246	0.341484	-4.78689
ENSMUSG00000079109	Pms2	-0.316211	-0.639523	0.00710156	3.80827	-1.97089	0.0550233	0.290157	-4.78925
ENSMUSG00000004383	Large	0.245387	0.0202204	0.470554	5.74017	2.19612	0.0333786	0.227261	-4.79152
ENSMUSG00000001280	Sp1	0.292921	0.0165503	0.569292	5.05175	2.13768	0.0382897	0.246056	-4.79298
ENSMUSG00000016757	Ttll12	0.330775	-0.0210513	0.6826	3.31233	1.89458	0.0647072	0.316291	-4.79458
ENSMUSG00000031134	Rbmx	0.387156	-0.0196112	0.793923	3.54824	1.918	0.0615911	0.310059	-4.79518
ENSMUSG00000032012	Nectin1	-0.471388	-0.99998	0.0572052	2.6407	-1.79767	0.0791491	0.349935	-4.79538
ENSMUSG00000026434	Nucks1	0.169701	0.0249827	0.314419	8.22945	2.36303	0.0225932	0.183665	-4.79547
ENSMUSG00000040520	Manea	0.293447	-0.00193565	0.58883	4.14684	2.00195	0.0514553	0.280452	-4.79727
ENSMUSG00000078695	Cisd3	0.249399	0.00731369	0.491484	4.59689	2.07603	0.0437431	0.262839	-4.7978
ENSMUSG00000004933	Matk	-0.219843	-0.421965	-0.0177222	5.55467	-2.19184	0.0337065	0.228653	-4.79917
ENSMUSG00000024309	Pfdn6	0.245346	0.0168451	0.473848	5.34781	2.16371	0.0359368	0.23679	-4.79923
ENSMUSG00000002028	Kmt2a	0.217493	0.0265254	0.40846	6.92116	2.29519	0.0265394	0.201483	-4.80045
ENSMUSG00000054091	AC155158.1	-0.19017	-0.355748	-0.0245913	7.21195	-2.31444	0.0253544	0.19703	-4.80049
ENSMUSG00000028411	Aptx	0.303922	-0.000907857	0.608752	4.21121	2.00915	0.0506569	0.278989	-4.80305
ENSMUSG00000044788	Fads6	0.415902	-0.0499695	0.881774	2.85735	1.79901	0.0788527	0.349721	-4.80328
ENSMUSG00000021546	Hnrnpk	0.199313	0.0258787	0.372748	7.28815	2.31584	0.0252707	0.196844	-4.80345
ENSMUSG00000030301	Ccdc91	0.207193	0.0173942	0.396993	5.67859	2.19983	0.0330959	0.226109	-4.80395
ENSMUSG00000062372	Otof	0.446184	-0.0655087	0.957876	2.62757	1.75716	0.0858201	0.36225	-4.80461
ENSMUSG00000075012	Fjx1	0.229772	0.0190547	0.440489	5.67951	2.19738	0.0332823	0.226867	-4.80514
ENSMUSG00000031299	Pdha1	0.180271	0.0250023	0.33554	7.80868	2.33964	0.0238864	0.190878	-4.80591
ENSMUSG00000010376	Nedd8	0.15801	0.0227899	0.29323	8.22199	2.35478	0.0230417	0.186436	-4.80966
ENSMUSG00000034480	Diaph2	0.22883	0.0166604	0.440999	5.47065	2.17339	0.0351551	0.233665	-4.81089
ENSMUSG00000005823	Gpr108	0.379274	-0.0254407	0.783988	3.44017	1.88848	0.0655404	0.318273	-4.8121
ENSMUSG00000021951	Eef1akmt1	-0.313974	-0.626116	-0.00183126	4.25815	-2.02697	0.0487275	0.276283	-4.81232
ENSMUSG00000034321	Exosc1	0.289877	-0.000188867	0.579944	4.22202	2.01384	0.050143	0.278606	-4.81232
ENSMUSG00000021113	Snapc1	0.31166	0.000960065	0.62236	4.29634	2.02138	0.0493262	0.276973	-4.8127
ENSMUSG00000060924	Csmd1	-0.342591	-0.699265	0.0140832	3.70527	-1.93558	0.0593363	0.303976	-4.81566
ENSMUSG00000031242	RP23-284F8.1	-0.252626	-0.491992	-0.0132595	5.08468	-2.12678	0.0390614	0.248109	-4.81572
ENSMUSG00000050697	Prkaa1	0.402099	-0.0299329	0.83413	3.28688	1.87553	0.0673391	0.323836	-4.81656
ENSMUSG00000021592	Arsk	0.346216	-0.0214402	0.713872	3.53747	1.89764	0.0642926	0.315939	-4.81761
ENSMUSG00000026499	Acbd3	0.201164	0.0187497	0.383578	6.07238	2.22228	0.031432	0.22018	-4.81954
ENSMUSG00000031672	Got2	0.228072	0.0203762	0.435767	6.01451	2.21285	0.0321217	0.222643	-4.82113
ENSMUSG00000115338	Pnp	-0.435178	-0.92035	0.0499946	2.935	-1.8075	0.0774979	0.347311	-4.82141
ENSMUSG00000017485	Top2b	0.201657	0.0224654	0.380848	6.70322	2.26779	0.0282852	0.208055	-4.82183
ENSMUSG00000027983	Cyp2u1	0.369526	-0.0198713	0.758924	3.60364	1.91232	0.0623348	0.311422	-4.82269
ENSMUSG00000053094	Tmem248	0.266685	0.00348382	0.529886	4.39707	2.04182	0.047169	0.272462	-4.82304
ENSMUSG00000052917	Senp7	0.231118	0.0156895	0.446546	5.43015	2.16191	0.0360834	0.237086	-4.82486
ENSMUSG00000020154	Ptprb	0.25258	0.0112977	0.493861	5.06607	2.10951	0.0406028	0.251906	-4.82583
ENSMUSG00000028884	Rpa2	0.428291	-0.0478862	0.904467	3.09392	1.8125	0.0767097	0.345705	-4.82613
ENSMUSG00000041126	H2afv	-0.184906	-0.34745	-0.0223618	7.0425	-2.29238	0.0267044	0.202367	-4.8268
ENSMUSG00000019082	Slc25a22	-0.365189	-0.730981	0.000602449	4.16294	-2.02021	0.05036	0.278659	-4.82819
ENSMUSG00000071660	Ttc9c	0.242211	0.00938256	0.47504	4.88014	2.09636	0.041812	0.256348	-4.82852
ENSMUSG00000008822	Acyp1	-0.34496	-0.690239	0.000319383	4.28734	-2.01612	0.0502028	0.278606	-4.82867
ENSMUSG00000090122	Kcne1l	-0.358999	-0.724978	0.00697915	4.09038	-1.97843	0.0543314	0.288047	-4.82909
ENSMUSG00000002329	Mdp1	0.237415	0.0115865	0.463243	5.13915	2.11854	0.03979	0.250154	-4.82931
ENSMUSG00000022677	Fopnl	-0.201932	-0.37721	-0.0266534	7.64973	-2.32172	0.0249323	0.195908	-4.82937
ENSMUSG00000022434	Fam118a	-0.370289	-0.773195	0.0326166	3.20962	-1.85202	0.0707145	0.331957	-4.82953
ENSMUSG00000001847	Rac1	0.16871	0.0222772	0.315143	7.63912	2.32172	0.024922	0.195908	-4.83115
ENSMUSG00000025871	RP23-452K4.2	-0.283874	-0.539197	-0.0285508	6.39536	-2.26694	0.0304668	0.216646	-4.83117
ENSMUSG00000030647	Ndufc2	-0.184605	-0.344623	-0.0245873	7.7243	-2.32479	0.0247421	0.195216	-4.83162
ENSMUSG00000037353	Letmd1	0.22396	0.0182484	0.429672	5.85079	2.19391	0.0335473	0.227961	-4.83374
ENSMUSG00000056296	Synpr	-0.317736	-0.602365	-0.0331064	6.80334	-2.30245	0.0301732	0.215489	-4.8368
ENSMUSG00000055239	Kcmf1	0.191111	0.0191558	0.363067	6.30207	2.23964	0.030197	0.215503	-4.83681
ENSMUSG00000001211	Agpat3	0.178371	0.0191417	0.3376	6.56867	2.2574	0.0289778	0.210917	-4.83753
ENSMUSG00000046844	Vat1l	0.294861	0.00709039	0.582633	4.65735	2.0648	0.0448429	0.266817	-4.83787
ENSMUSG00000024383	Map3k2	0.260481	0.0126126	0.50835	5.08057	2.11769	0.039866	0.250154	-4.8381
ENSMUSG00000045752	Tssc4	0.316851	-0.00403599	0.637737	4.15806	1.98981	0.0528255	0.283455	-4.83823
ENSMUSG00000029310	Nudt9	0.268338	0.00506788	0.531609	4.50037	2.05394	0.0459295	0.269226	-4.83867
ENSMUSG00000000581	C1d	-0.220888	-0.42116	-0.0206165	6.13913	-2.2226	0.0314093	0.220177	-4.84306
ENSMUSG00000059974	Ntm	-0.158362	-0.293189	-0.0235351	8.91418	-2.36691	0.0223845	0.182419	-4.84367
ENSMUSG00000001829	Clpb	0.246837	0.0104918	0.483183	4.97923	2.10461	0.0410498	0.253406	-4.84422
ENSMUSG00000001663	Gstt1	-0.391296	-0.817015	0.0344234	3.28846	-1.85221	0.0706867	0.331957	-4.84455
ENSMUSG00000034575	Papd7	-0.331642	-0.668574	0.00529032	3.98286	-1.98351	0.0535483	0.285961	-4.84536
ENSMUSG00000028062	Lamtor2	-0.28652	-0.578015	0.00497488	4.1188	-1.98076	0.0538668	0.286816	-4.84544
ENSMUSG00000003974	Grm3	-0.20831	-0.392219	-0.024401	7.10136	-2.28252	0.0273287	0.204955	-4.8459
ENSMUSG00000029088	Kcnip4	0.248457	0.00868715	0.488226	5.01859	2.08816	0.0425814	0.258977	-4.84642
ENSMUSG00000024384	Iws1	0.218808	0.0110093	0.426607	5.19099	2.12192	0.0394902	0.250149	-4.84849
ENSMUSG00000028672	Hmgcl	-0.333504	-0.684308	0.0172989	3.68041	-1.91578	0.0618804	0.310308	-4.84987
ENSMUSG00000028228	Cpne3	0.253887	0.0102571	0.497517	4.96658	2.09999	0.0414748	0.255391	-4.85032
ENSMUSG00000024926	Kat5	0.326141	-0.0153184	0.6676	3.77825	1.92475	0.0607169	0.307352	-4.85078
ENSMUSG00000049300	Prmt6	0.354809	-0.0259473	0.735565	3.54318	1.87783	0.0670176	0.323314	-4.85128
ENSMUSG00000039904	Gpr37	0.300512	0.00720049	0.593824	4.70239	2.06474	0.0448614	0.266817	-4.8513
ENSMUSG00000010025	Aldh3a2	0.25804	0.00414201	0.511938	4.55508	2.04803	0.0465311	0.270983	-4.85187
ENSMUSG00000039231	Suv39h1	0.220435	0.0137585	0.427111	5.4319	2.1493	0.0371286	0.241116	-4.85218
ENSMUSG00000034158	Lrrc58	0.169408	0.0239854	0.314831	8.52092	2.34752	0.0234434	0.188867	-4.85238
ENSMUSG00000021360	Gcnt2	0.334069	-0.0146686	0.682806	3.8562	1.93039	0.0599947	0.305952	-4.85269
ÜÇy}ENSMUSG00000031529	Tnks	0.21492	0.0163728	0.413468	5.7636	2.18133	0.0345254	0.231191	-4.85283
ENSMUSG00000036264	Fstl4	0.345509	-0.022005	0.713023	3.63885	1.89449	0.0647184	0.316291	-4.85346
ENSMUSG00000041205	Map6d1	-0.423694	-0.886197	0.0388075	3.17835	-1.84866	0.0715434	0.33379	-4.85799
ENSMUSG00000066357	Wdr6	0.202708	0.0186142	0.386802	6.34214	2.21891	0.0316771	0.221276	-4.8603
ENSMUSG00000035048	Anapc13	-0.217423	-0.417143	-0.0177026	5.88278	-2.19377	0.0335584	0.227961	-4.86074
ENSMUSG00000046364	Rpl27a	-0.213893	-0.405927	-0.0218581	6.52318	-2.24452	0.0298573	0.214628	-4.8611
ENSMUSG00000045374	Wdr81	0.359765	-0.0402913	0.759822	3.15756	1.8122	0.0767573	0.345705	-4.8618
ENSMUSG00000036606	Plxnb2	0.350823	-0.027688	0.729333	3.43096	1.86774	0.0684418	0.326097	-4.86265
ENSMUSG00000027222	Pex16	0.268949	0.00893486	0.528964	4.87438	2.0844	0.042939	0.260193	-4.86272
ENSMUSG00000062980	Cped1	0.533119	-0.0876147	1.15385	2.61136	1.74239	0.090057	0.371862	-4.86308
ENSMUSG00000060904	Arl1	-0.200316	-0.37956	-0.0210722	6.69445	-2.25206	0.0293401	0.212302	-4.86331
ENSMUSG00000031642	Sh3rf1	0.222759	0.0214833	0.424034	6.43156	2.23024	0.0308603	0.2185	-4.86383
ENSMUSG00000021684	Pde8b	0.177963	0.0182893	0.337637	6.59861	2.24597	0.0297573	0.214222	-4.8639
ENSMUSG00000041769	Ppp2r2d	0.197253	0.0187051	0.375802	6.38304	2.22626	0.0311448	0.21957	-4.86456
ENSMUSG00000040383	Aqr	0.28174	-0.0031153	0.566595	4.26897	1.99311	0.0524491	0.283191	-4.86862
ENSMUSG00000075478	Slitrk1	-0.291122	-0.574165	-0.0080786	4.83408	-2.07279	0.0440706	0.26365	-4.8691
ENSMUSG00000039067	Psmd7	0.172966	0.0197303	0.326202	7.13265	2.27462	0.0278383	0.206762	-4.87053
ENSMUSG00000039735	Fnbp1l	0.203792	0.0159775	0.391606	5.9208	2.18658	0.0341139	0.23062	-4.87364
ENSMUSG00000029060	Mib2	0.279724	0.00169217	0.557756	4.57031	2.02742	0.0486804	0.276283	-4.87383
ENSMUSG00000005674	Tomm40l	-0.225441	-0.431294	-0.0195889	6.10987	-2.20691	0.0325628	0.22366	-4.87565
ENSMUSG00000019892	Lrriq1	-0.383289	-0.819642	0.0530648	2.92306	-1.77009	0.0836149	0.358748	-4.87613
ENSMUSG00000020706	Ftsj3	0.301765	-0.00874074	0.61227	4.14463	1.95842	0.056514	0.294559	-4.87645
ENSMUSG00000053769	Lysmd1	0.309922	-0.0140106	0.633854	3.92914	1.92799	0.0603006	0.306243	-4.8771
ENSMUSG00000042410	Agps	0.273555	-0.00032953	0.54744	4.38415	2.01273	0.0502645	0.278606	-4.87896
ENSMUSG00000035504	Reep6	0.302654	-0.0172992	0.622607	3.72779	1.9062	0.0631447	0.313295	-4.87947
ENSMUSG00000047003	Zfp41	0.348522	-0.0382095	0.735253	3.22118	1.81605	0.0761538	0.344716	-4.88006
ENSMUSG00000003119	Cdk12	0.279147	0.00104197	0.557253	4.56889	2.0227	0.0491841	0.276646	-4.88214
ENSMUSG00000109324	Prmt1	0.270494	0.0076188	0.533369	5.03399	2.07356	0.0439836	0.26365	-4.88233
ENSMUSG00000002455	Prpf6	0.256539	0.00125816	0.51182	4.58446	2.02508	0.0489291	0.276283	-4.88291
ENSMUSG00000049122	Frmd3	-0.514884	-1.13888	0.109111	2.31654	-1.66465	0.103343	0.395935	-4.88475
ENSMUSG00000023022	Lima1	0.291056	-0.00144123	0.583553	4.43638	2.00522	0.0510909	0.279726	-4.88483
ENSMUSG00000038967	Pdk2	0.260814	0.0154509	0.506177	5.62626	2.14328	0.0377521	0.243711	-4.88526
ENSMUSG00000020205	Phlda1	0.279831	0.00693677	0.552726	4.91248	2.06637	0.0446875	0.266533	-4.88602
ENSMUSG00000035278	Plekhj1	0.258074	0.0123711	0.503776	5.29812	2.11661	0.0399623	0.250154	-4.88712
ENSMUSG00000023800	Tiam2	-0.312073	-0.638553	0.0144077	3.85534	-1.92622	0.0605275	0.30692	-4.88959
ENSMUSG00000025337	Sbds	0.223487	0.0154735	0.431501	5.78299	2.16505	0.0358274	0.236763	-4.88991
ENSMUSG00000032259	Drd2	0.448293	-0.0787962	0.975383	2.65109	1.7139	0.093558	0.377556	-4.89024
ENSMUSG00000010290	AC161207.1	-0.256635	-0.513099	-0.000171239	4.48972	-2.0165	0.0498537	0.278038	-4.89045
ENSMUSG00000022556	Hsf1	0.416894	-0.0690902	0.902877	2.71365	1.72867	0.0908545	0.374369	-4.8907
ENSMUSG00000021018	Polr2h	-0.552678	-1.1771	0.0717417	3.11461	-1.81452	0.0805186	0.352519	-4.89092
ENSMUSG00000022983	Scaf4	0.255646	0.000359686	0.510933	4.54709	2.01799	0.0496918	0.277605	-4.89113
ENSMUSG00000038683	Pak1ip1	0.219584	0.0112455	0.427922	5.43279	2.12392	0.0393127	0.249224	-4.89162
ENSMUSG00000024975	Pdcd4	0.174386	0.0178517	0.330921	6.80446	2.24497	0.0298267	0.214565	-4.8925
ENSMUSG00000050447	Lypd6	-0.192432	-0.367966	-0.0168989	6.27896	-2.20915	0.0323957	0.223582	-4.8926
ENSMUSG00000040797	Iqsec3	-0.191601	-0.36307	-0.0201312	6.86202	-2.25174	0.0293617	0.212303	-4.89379
ENSMUSG00000032724	Abtb2	0.36112	-0.0391478	0.761388	3.25719	1.81806	0.0758409	0.343931	-4.89443
ENSMUSG00000039485	Tspyl4	0.217966	0.0145796	0.421352	5.73004	2.15961	0.0362727	0.237734	-4.89456
ENSMUSG00000034055	Phka1	-0.387734	-0.788443	0.0129748	4.1267	-1.96424	0.0574672	0.298099	-4.89488
ENSMUSG00000045409	Trim39	0.388283	-0.0647458	0.841311	2.6259	1.72715	0.0911289	0.374369	-4.89852
ENSMUSG00000078768	Zfp566	0.442927	-0.0683466	0.9542	2.64951	1.74578	0.0878044	0.366532	-4.89875
ENSMUSG00000009549	Srp14	-0.178215	-0.334488	-0.021942	7.87126	-2.29809	0.0263488	0.200499	-4.90038
ENSMUSG00000029669	Tspan12	-0.374768	-0.787068	0.0375316	3.30192	-1.83171	0.0737435	0.33909	-4.90103
ENSMUSG00000070394	Tmem256	-0.217954	-0.410748	-0.0251598	7.52486	-2.28547	0.0277116	0.2067	-4.90202
ENSMUSG00000035173	Ccdc186	0.250439	0.0107623	0.490117	5.31069	2.10564	0.0409555	0.253406	-4.90206
ENSMUSG00000001707	Eef1e1	-0.337668	-0.696719	0.0213818	3.73455	-1.89515	0.0646296	0.316291	-4.90221
ENSMUSG00000026027	Stradb	-0.285133	-0.571321	0.00105598	4.4874	-2.00772	0.050815	0.278989	-4.9038
ENSMUSG00000044345	Marveld1	0.428923	-0.0732521	0.931099	2.79573	1.7212	0.0922129	0.375852	-4.90426
ENSMUSG00000020717	Pecam1	0.363824	-0.0346004	0.762249	3.43075	1.84015	0.0724718	0.335114	-4.90473
ENSMUSG00000030209	Grin2b	0.251765	0.0284439	0.475085	7.63631	2.30028	0.0284014	0.208256	-4.90604
ENSMUSG00000030579	Tyrobp	-0.217806	-0.426123	-0.00948883	5.29214	-2.10694	0.0408364	0.252879	-4.90621
ENSMUSG00000039157	Fam102a	0.197182	0.0195652	0.3748	6.78342	2.23713	0.030373	0.21629	-4.90693
ENSMUSG00000038949	Cnst	0.337527	-0.0209184	0.695973	3.80343	1.89755	0.0643043	0.315939	-4.90927
ENSMUSG00000020848	Doc2b	0.321279	0.00151236	0.641045	4.5874	2.03104	0.0489769	0.276283	-4.90933
ENSMUSG00000021468	Sptlc1	0.266518	-0.00178667	0.534823	4.51359	2.00173	0.0514792	0.280452	-4.91213
ENSMUSG00000069237	Fam8a1	0.184525	0.0168868	0.352164	6.5334	2.21814	0.0317329	0.221276	-4.9127
ENSMUSG00000016256	Ctsz	0.322615	-0.0178872	0.663117	3.9391	1.90929	0.062734	0.312468	-4.9139
ENSMUSG00000025261	Huwe1	0.165446	0.0189356	0.311955	7.54319	2.2756	0.0277746	0.2067	-4.91411
ENSMUSG00000027744	Stoml3	-1.44165	-3.64173	0.758433	0.554012	-1.37973	0.185085	0.518342	-4.91605
ENSMUSG00000041241	Mul1	0.241898	0.00461018	0.479187	4.96182	2.0543	0.0458931	0.269226	-4.91698
ENSMUSG00000019505	Ubb	0.17802	0.0224592	0.33358	8.29158	2.30609	0.025858	0.199219	-4.91891
ENSMUSG00000027669	Gnb4	0.253522	0.00384641	0.503199	4.97128	2.0462	0.0467185	0.271439	-4.91971
ENSMUSG00000028698	Pik3r3	-0.263149	-0.535003	0.00870563	4.20737	-1.95062	0.0574651	0.298099	-4.91987
ENSMUSG00000032118	Fez1	0.184974	0.0196172	0.35033	7.14275	2.25422	0.0291929	0.21217	-4.91993
ENSMUSG00000043079	Synpo	0.209757	0.0227104	0.396804	7.29959	2.26177	0.0288411	0.210205	-4.92012
ENSMUSG00000068921	Dap3	0.257377	0.00830592	0.506448	5.13706	2.08235	0.0431345	0.260607	-4.92083
ENSMUSG00000048040	Arxes2	-0.283946	-0.563831	-0.00406182	4.91028	-2.0444	0.0469035	0.272193	-4.92084
ENSMUSG00000029538	Srsf9	0.21833	0.014023	0.422637	5.83123	2.15347	0.0367806	0.239948	-4.92139
ENSMUSG00000040820	Hlcs	0.372326	-0.044483	0.789134	3.11569	1.80009	0.0786789	0.349107	-4.92154
ENSMUSG00000035521	Gnptg	-0.232406	-0.455928	-0.00888372	5.22366	-2.09524	0.0419161	0.256668	-4.92169
ENSMUSG00000026520	Pycr2	0.266592	0.000405488	0.532778	4.66781	2.01822	0.0496669	0.277605	-4.92337
ENSMUSG00000021701	Plk2	0.317538	0.00426784	0.630809	4.83025	2.05244	0.0471097	0.272462	-4.92526
ENSMUSG00000016346	Kcnq2	0.228826	0.027763	0.42989	8.28954	2.31648	0.0269629	0.203292	-4.92672
ENSMUSG00000025417	Pip4k2c	0.226291	0.011676	0.440905	5.56744	2.12478	0.0392367	0.248902	-4.92772
ENSMUSG00000029428	Stx2	0.303082	-0.0173871	0.62355	3.89196	1.90582	0.0631949	0.313341	-4.92879
ENSMUSG00000042447	Mios	0.346719	-0.0358376	0.729276	3.47386	1.82637	0.0745579	0.341404	-4.92943
ENSMUSG00000002413	Braf	0.185089	0.0183924	0.351787	7.01239	2.23749	0.0303474	0.216264	-4.93041
ENSMUSG00000030060	Hmces	0.36142	-0.0427614	0.765601	3.3719	1.80195	0.0783805	0.348565	-4.9312
ENSMUSG00000043987	Cep164	-0.404969	-0.878635	0.0686971	2.88807	-1.72289	0.0919045	0.375852	-4.93122
ENSMUSG00000031158	Timm17b	0.249348	0.00156858	0.497128	4.77157	2.02791	0.0486281	0.276283	-4.93146
ENSMUSG00000071074	Yipf3	0.425553	-0.0686668	0.919773	2.85214	1.73517	0.0896849	0.37048	-4.93254
ENSMUSG00000071477	Zfp777	0.322496	-0.0254156	0.670408	3.68651	1.86794	0.0684136	0.326097	-4.93285
ENSMUSG00000079523	Tmsb10	-0.221377	-0.438188	-0.00456624	4.98055	-2.05759	0.0455618	0.268501	-4.93304
ENSMUSG00000055932	Fto	0.228601	0.0174526	0.439749	6.302	2.18173	0.0344949	0.231144	-4.93345
ENSMUSG00000049791	Fzd4	0.367615	-0.0528148	0.788045	3.045	1.76201	0.0849884	0.36027	-4.93356
ENSMUSG00000044080	S100a1	-0.166366	-0.311876	-0.0208562	8.43226	-2.30399	0.0259863	0.199388	-4.93356
ENSMUSG00000034891	Sncb	0.21632	0.0208303	0.41181	6.95992	2.2316	0.0309076	0.218678	-4.93383
ENSMUSG00000040447	Spns2	-0.349458	-0.743289	0.0443745	3.13694	-1.7881	0.0806218	0.352814	-4.93473
ENSMUSG00000027639	Samhd1	0.358454	-0.0328856	0.749794	3.57366	1.84581	0.0716289	0.333806	-4.93624
ENSMUSG00000031565	Fgfr1	0.247419	0.0121838	0.482654	5.54994	2.11952	0.0397025	0.250154	-4.93843
ENSMUSG00000026087	Mrpl30	0.19936	0.015319	0.3834	6.23745	2.18289	0.0344028	0.231035	-4.93974
ENSMUSG00000029536	Gatc	0.358317	-0.0413086	0.757942	3.30955	1.80685	0.0776012	0.347385	-4.94031
ENSMUSG00000036427	Gpi1	0.149809	0.0167242	0.282893	7.65423	2.26839	0.028246	0.208055	-4.94113
ENSMUSG00000009863	Sdhb	0.181226	0.0195748	0.342877	7.52903	2.25917	0.0288588	0.210205	-4.94169
ENSMUSG00000030707	Coro1a	-0.353161	-0.74726	0.0409375	3.40557	-1.80582	0.0777636	0.347474	-4.94183
ENSMUSG00000031661	Nkd1	0.28891	-0.0138399	0.591659	4.04975	1.92303	0.0609383	0.307556	-4.94201
ENSMUSG00000032388	Spg21	0.25871	0.00467601	0.512744	4.96591	2.05224	0.0461015	0.269344	-4.94306
ENSMUSG00000058586	Serhl	0.343549	-0.0307248	0.717823	3.63711	1.84972	0.0710513	0.332437	-4.94429
ENSMUSG00000020349	Ppp2ca	0.151087	0.0172768	0.284897	7.8421	2.27534	0.0277917	0.2067	-4.94567
ENSMUSG00000038602	Slc35f1	0.257615	0.0124983	0.502731	5.69545	2.12015	0.0398633	0.250154	-4.94603
ENSMUSG00000024527	Afg3l2	0.312537	-0.014177	0.639251	4.10285	1.92771	0.0603371	0.306243	-4.94656
ENSMUSG00000002486	Tchp	0.335604	-0.0426949	0.713902	3.24371	1.78772	0.0806834	0.35291	-4.94677
ENSMUSG00000052712	RP23-73B23.4	0.255001	0.000214822	0.509788	4.78367	2.01685	0.0498154	0.278025	-4.94718
ENSMUSG00000052301	Doc2a	-0.293224	-0.598623	0.0121747	4.15885	-1.93482	0.059433	0.303998	-4.94901
ENSMUSG00000020792	Exoc7	0.266073	-0.00630499	0.538452	4.37939	1.9685	0.0553057	0.291086	-4.95019
ENSMUSG00000048234	Rnf149	-0.31697	-0.658617	0.0246778	3.7564	-1.86959	0.0681786	0.326097	-4.95429
ENSMUSG00000050875	AC132242.1	0.264621	0.0033334	0.525908	4.9796	2.04086	0.0472689	0.272462	-4.95522
ENSMUSG00000029695	Aass	-0.416299	-0.901158	0.0685602	2.8979	-1.7302	0.0905765	0.373538	-4.95548
ENSMUSG00000022296	Baalc	-0.168367	-0.317338	-0.0193958	8.02221	-2.27752	0.0276501	0.206581	-4.95789
ENSMUSG00000074607	Tox2	0.245309	0.00573389	0.484885	5.22716	2.06338	0.0449839	0.267252	-4.95791
ENSMUSG00000023015	Racgap1	-0.396629	-0.861566	0.0683082	2.81149	-1.71909	0.0926008	0.376173	-4.95815
ENSMUSG00000063931	Pepd	0.333239	-0.0397221	0.706199	3.27099	1.80053	0.0786084	0.349039	-4.95885
ENSMUSG00000042541	Sem1	-0.244059	-0.472551	-0.0155682	5.97022	-2.15591	0.0368962	0.240385	-4.96086
ENSMUSG00000061911	Myt1l	0.155498	0.0197366	0.29126	8.85057	2.30811	0.0257354	0.19874	-4.96331
ENSMUSG00000028603	Scp2	0.2378	0.0025607	0.47304	4.95231	2.03709	0.0476613	0.273107	-4.9635
ENSMUSG00000024002	Brd4	0.210322	0.0101073	0.410537	5.72237	2.11688	0.0399384	0.250154	-4.96801
ENSMUSG00000038517	Tbkbp1	0.247831	0.00451884	0.491144	5.12525	2.05258	0.0460678	0.269344	-4.96835
ENSMUSG00000028309	Rnf20	0.22049	0.010504	0.430476	5.70958	2.11595	0.0400214	0.250185	-4.96891
ENSMUSG00000053963	AC121838.2	-0.196638	-0.376084	-0.0171918	6.77314	-2.20821	0.0324658	0.223582	-4.96909
ENSMUSG00000001376	Vps50	-0.24813	-0.49923	0.00297063	4.60503	-1.99131	0.0526539	0.283298	-4.96948
ENSMUSG00000032263	Bckdhb	0.316021	-0.0156763	0.647719	4.28915	1.91991	0.0613418	0.308961	-4.97237
ENSMUSG00000091625	Lsm5	-0.360718	-0.761681	0.0402444	3.45551	-1.81289	0.0766483	0.345705	-4.97246
ENSMUSG00000018433	Nol11	0.241027	-0.00248524	0.484538	4.69712	1.99459	0.0522824	0.282987	-4.97674
ENSMUSG00000026765	Lypd6b	-0.356205	-0.763003	0.0505933	3.21206	-1.76453	0.0845579	0.360035	-4.97834
ENSMUSG00000050213	Snip1	0.360817	-0.0650033	0.786638	2.89915	1.70753	0.0947448	0.379493	-4.97927
ENSMUSG00000047022	Mipol1	0.316864	-0.0419775	0.675706	3.37784	1.77942	0.082053	0.355767	-4.98033
ENSMUSG00000020130	Tbc1d15	0.245056	-0.00248381	0.492597	4.67559	1.99493	0.0522432	0.282987	-4.98148
ENSMUSG00000028530	Jak1	0.169346	0.0179334	0.320758	7.79797	2.25383	0.0292196	0.212207	-4.98423
ENSMUSG00000022426	Josd1	-0.280783	-0.555643	-0.00592329	5.17599	-2.06405	0.0454814	0.268191	-4.98504
ENSMUSG00000020803	Txndc17	-0.289757	-0.576769	-0.00274592	5.03965	-2.03952	0.0479473	0.274219	-4.98635
ENSMUSG00000020734	Grin2c	-0.290502	-0.579591	-0.00141312	4.99741	-2.02916	0.0489411	0.276283	-4.98846
ENSMUSG00000033411	Ctdspl2	0.287534	-0.0133187	0.588387	4.26273	1.92594	0.0605636	0.30692	-4.98859
ENSMUSG00000025200	Cwf19l1	0.352717	-0.0750628	0.780497	2.67741	1.66155	0.103686	0.396632	-4.98935
ENSMUSG00000006676	Usp19	0.243641	-0.00265532	0.489937	4.75295	1.99343	0.0524136	0.283191	-4.98978
ENSMUSG00000037376	Trmt6	0.236179	0.00296652	0.469392	5.17664	2.04078	0.0472767	0.272462	-4.98996
ENSMUSG00000036057	Ptpn23	0.343815	-0.0623463	0.749977	2.91566	1.70582	0.095065	0.379837	-4.99119
ENSMUSG00000001767	Crnkl1	0.349311	-0.0521898	0.750812	3.29952	1.75321	0.0865047	0.364042	-4.99144
ENSMUSG00000036585	Fgf1	0.204183	0.0156456	0.392721	6.56131	2.18238	0.0344428	0.231035	-4.99444
ENSMUSG00000022912	Pros1	0.35498	-0.0583956	0.768355	3.1483	1.73048	0.0905268	0.373489	-4.99503
ENSMUSG00000039911	Spsb1	0.352105	-0.0606712	0.764881	3.07635	1.71896	0.0926245	0.376173	-4.99526
ENSMUSG00000032551	RP23-438P19.2	-0.228778	-0.455842	-0.00171468	5.15773	-2.03037	0.0483673	0.27535	-4.99715
ENSMUSG00000032010	Usp2	0.198047	0.0120174	0.384076	6.23133	2.14533	0.0374632	0.242639	-5.00077
ENSMUSG00000031015	Swap70	-0.354669	-0.763303	0.053966	3.14541	-1.74902	0.0872341	0.36478	-5.00229
ENSMUSG00000025939	Ube2w	-0.232072	-0.457183	-0.00696148	5.5456	-2.07747	0.043604	0.262288	-5.00343
ENSMUSG00000027998	Plrg1	0.286796	-0.0104744	0.584067	4.48457	1.94415	0.0582643	0.300824	-5.00357
ENSMUSG00000059714	Flot1	0.212633	0.00680203	0.418465	5.58343	2.08175	0.0431926	0.260607	-5.00501
ENSMUSG00000034252	Senp6	0.168813	0.0124552	0.32517	6.60946	2.17567	0.0349727	0.233238	-5.00697
ENSMUSG00000005907	Pex1	-0.302338	-0.636634	0.0319583	3.69767	-1.82251	0.0751526	0.341908	-5.00772
ENSMUSG00000033728	Lrrc14	0.227868	-0.00143773	0.457175	4.88617	2.00252	0.0513917	0.28044	-5.00778
ENSMUSG00000030189	Ybx3	0.268581	-0.00129494	0.538457	4.82175	2.00548	0.0510621	0.279726	-5.00973
ENSMUSG00000042680	Garem1	-0.236297	-0.473552	0.000959166	4.87648	-2.007	0.0508935	0.279264	-5.00999
ENSMUSG00000023094	Msrb2	-0.284374	-0.583282	0.0145332	4.25592	-1.91717	0.0616984	0.310108	-5.01006
ENSMUSG00000026584	Scyl3	-0.393869	-0.838917	0.051179	3.48949	-1.78704	0.0812903	0.35417	-5.01069
ENSMUSG00000020741	Cluh	0.217051	0.007145	0.426957	5.56372	2.08375	0.0430013	0.260193	-5.01156
ENSMUSG00000029545	Acads	0.317581	-0.0186535	0.653815	4.2388	1.90336	0.0635237	0.313869	-5.01245
ENSMUSG00000068220	Lgals1	-0.332924	-0.691065	0.0252166	4.05088	-1.87338	0.067657	0.32455	-5.01263
ENSMUSG00000018541	Cwc25	0.341799	-0.0394478	0.723046	3.67262	1.80664	0.0776338	0.347385	-5.01352
ENSMUSG00000028484	Psip1	0.185518	0.0152793	0.355757	7.00021	2.19602	0.0333863	0.227261	-5.01355
ENSMUSG00000049800	Sertad2	0.223978	0.00294906	0.445006	5.25572	2.04204	0.0471468	0.272462	-5.01659
ENSMUSG00000029403	Cdkl2	-0.212514	-0.424502	-0.000526345	5.06003	-2.02015	0.049458	0.27724	-5.01762
ENSMUSG00000071424	Grid2	0.28351	-0.0226792	0.589699	3.97526	1.86589	0.0687063	0.327042	-5.02002
ENSMUSG00000030386	Zfp606	0.273754	-0.0163473	0.563855	4.22483	1.9016	0.0637593	0.314453	-5.02018
ENSMUSG00000033615	Cplx1	-0.157046	-0.294737	-0.0193558	9.33589	-2.29843	0.026328	0.200495	-5.02053
ENSMUSG00000041153	Osgin2	-0.284914	-0.604124	0.0342953	3.58222	-1.79865	0.0789104	0.349819	-5.02269
ENSMUSG00000050761	Gp1bb	0.220661	0.000710246	0.440612	5.127	2.02166	0.0492961	0.276973	-5.02271
ENSMUSG00000038965	Ube2l3	0.177359	0.0152831	0.339434	7.1848	2.20517	0.032693	0.224027	-5.02358
ENSMUSG00000026834	Acvr1c	0.273681	-0.000252727	0.547614	4.99985	2.0142	0.0502026	0.278606	-5.02383
ENSMUSG00000027259	Adal	0.393442	-0.0875257	0.87441	2.61119	1.64844	0.106359	0.400347	-5.02421
ENSMUSG00000031808	Slc27a1	0.289824	-0.0137052	0.593354	4.34313	1.92416	0.0607925	0.307352	-5.02458
ENSMUSG00000008200	Fnbp4	-0.288822	-0.596139	0.018496	4.18649	-1.89387	0.0648034	0.316549	-5.02617
ENSMUSG00000027506	Tpd52	-0.209555	-0.409033	-0.0100762	5.99929	-2.11694	0.0399329	0.250154	-5.02643
ENSMUSG00000023170	Gps2	0.279672	-0.0183516	0.577696	4.26326	1.89106	0.065186	0.317303	-5.02786
ENSMUSG00000052135	Foxo6	0.280691	-0.0234785	0.58486	4.01838	1.8596	0.0696102	0.328809	-5.02896
ENSMUSG00000022354	Ndufb9	-0.165587	-0.311161	-0.0200125	9.30498	-2.29218	0.0267172	0.202367	-5.029
ENSMUSG00000020238	Ncln	0.314734	-0.0435483	0.673017	3.581	1.77021	0.0835937	0.358748	-5.02904
:Ç≈}ENSMUSG00000056531	Ccdc18	-0.368697	-0.819191	0.0817983	2.81023	-1.64925	0.106192	0.400174	-5.03147
ENSMUSG00000048175	Asb8	0.232976	-0.00591826	0.47187	4.73393	1.96523	0.0556959	0.29199	-5.03168
ENSMUSG00000038954	Supt3	0.380478	-0.0649189	0.825876	3.31731	1.72143	0.0921706	0.375852	-5.03455
ENSMUSG00000018405	Mrm1	0.410267	-0.0966868	0.91722	2.80754	1.63082	0.11004	0.407982	-5.03472
ENSMUSG00000071547	Nt5dc2	0.350875	-0.0542499	0.756001	3.35856	1.7453	0.0878861	0.366576	-5.03512
ENSMUSG00000028330	Ncbp1	0.244041	-0.00862728	0.49671	4.61482	1.94634	0.0579919	0.299731	-5.03667
ENSMUSG00000072915	RP23-419P16.7	-0.311731	-0.651196	0.0277338	3.98558	-1.85052	0.0709348	0.332075	-5.03719
ENSMUSG00000041642	Kif21b	0.204984	0.00257003	0.407397	5.35792	2.04074	0.0472815	0.272462	-5.0374
ENSMUSG00000019777	Hdac2	0.231483	-0.00125699	0.464223	5.07701	2.00427	0.0511968	0.279995	-5.03822
ENSMUSG00000028069	Gpatch4	0.199465	0.00446914	0.39446	5.54361	2.06134	0.0451872	0.267629	-5.03892
ENSMUSG00000042425	Frmpd3	0.357347	-0.0816231	0.796317	2.76916	1.64045	0.108015	0.403658	-5.03952
ENSMUSG00000020182	Ddc	0.408081	-0.0918333	0.907995	2.95864	1.64497	0.107075	0.401237	-5.03985
ENSMUSG00000022477	Aco2	-0.186942	-0.356547	-0.017338	7.62396	-2.22115	0.0315139	0.220597	-5.04045
ENSMUSG00000020053	Igf1	-0.403412	-0.891961	0.0851377	2.81694	-1.66398	0.103197	0.395836	-5.04136
ENSMUSG00000021040	Slirp	-0.205417	-0.396129	-0.0147046	6.74748	-2.17053	0.0353847	0.234718	-5.04215
ENSMUSG00000022503	Nubp1	-0.380446	-0.844824	0.0839317	2.82002	-1.65093	0.105846	0.399787	-5.04225
ENSMUSG00000025027	Xpnpep1	0.339644	-0.0469929	0.726281	3.47716	1.77022	0.0835921	0.358748	-5.04226
ENSMUSG00000071662	Polr2g	-0.203953	-0.399975	-0.00792978	5.85838	-2.09667	0.0417829	0.256329	-5.0435
ENSMUSG00000032262	Elovl4	0.312283	-0.0282149	0.652781	4.05895	1.84817	0.0712804	0.333138	-5.04377
ENSMUSG00000061898	Rbak	-0.377162	-0.84699	0.092667	2.62917	-1.61769	0.11285	0.412668	-5.0438
ENSMUSG00000026657	Frmd4a	-0.214857	-0.423834	-0.00588015	5.59665	-2.07185	0.0441496	0.263962	-5.04387
ENSMUSG00000025607	Copg2	0.259344	-0.0151088	0.533798	4.32768	1.90422	0.0634086	0.313869	-5.04416
ENSMUSG00000034557	Zfyve9	0.183266	0.0142996	0.352233	7.07501	2.18569	0.0341832	0.23062	-5.04737
ENSMUSG00000000378	Ccm2	0.340135	-0.00769641	0.687967	4.81575	1.9933	0.0549722	0.290043	-5.04826
ENSMUSG00000009741	Ubp1	0.210675	0.00740305	0.413948	5.90576	2.08854	0.0425456	0.258977	-5.04856
ENSMUSG00000068206	Pick1	0.277904	-0.034857	0.590665	3.65317	1.79056	0.0802188	0.352231	-5.04981
ENSMUSG00000045205	Dpy19l4	0.252517	-0.000903711	0.505938	5.10617	2.00797	0.0507875	0.278989	-5.05194
ENSMUSG00000020687	Cdc27	0.239762	-0.000699213	0.480223	5.1556	2.00929	0.0506413	0.278989	-5.05337
ENSMUSG00000026577	Blzf1	0.279617	-0.0167057	0.575939	4.40324	1.90154	0.0637664	0.314453	-5.05376
ENSMUSG00000023939	Mrpl14	-0.230164	-0.454069	-0.00625966	5.65723	-2.07149	0.0441852	0.264015	-5.0543
ENSMUSG00000023938	Aars2	-0.413257	-0.940148	0.113633	2.49274	-1.58055	0.121117	0.427088	-5.05464
ENSMUSG00000006058	Snf8	-0.202762	-0.396408	-0.00911587	6.0508	-2.11001	0.0405569	0.251779	-5.05517
ENSMUSG00000049090	Zadh2	-0.254408	-0.524588	0.0157722	4.31884	-1.89751	0.0643092	0.315939	-5.05676
ENSMUSG00000073838	Tufm	0.366934	-0.0745455	0.808414	2.9646	1.67489	0.101024	0.390993	-5.05786
ENSMUSG00000059518	Znhit1	0.246854	-0.00911593	0.502825	4.75922	1.94339	0.058359	0.300998	-5.05938
ENSMUSG00000031774	Fam192a	0.260459	-0.0117875	0.532705	4.48042	1.9279	0.0603124	0.306243	-5.05973
ENSMUSG00000071531	Gprin2	-0.326992	-0.705889	0.0519049	3.38395	-1.7391	0.0889839	0.369283	-5.05981
ENSMUSG00000028041	Adam15	0.373123	-0.0357234	0.781969	4.1518	1.85152	0.0723923	0.33506	-5.06168
ENSMUSG00000029319	Coq2	-0.185727	-0.361673	-0.00978199	6.32254	-2.12719	0.0390256	0.248041	-5.06397
ENSMUSG00000038240	Pdss2	0.320768	-0.0539714	0.695506	3.38886	1.72492	0.0915339	0.375109	-5.06422
ENSMUSG00000045827	Serpinb9	0.317409	-0.0550375	0.689856	3.28206	1.71737	0.0929175	0.376588	-5.0645
ENSMUSG00000075704	Txnrd2	-0.27443	-0.571299	0.022439	4.10678	-1.86283	0.0691444	0.328179	-5.06483
ENSMUSG00000033557	Fam20b	0.214376	0.00275247	0.425999	5.43567	2.04136	0.0472169	0.272462	-5.06529
ENSMUSG00000027775	Mfsd1	-0.208058	-0.416126	1.00794e-05	5.28297	-2.01505	0.0500106	0.278284	-5.06529
ENSMUSG00000037257	Aagab	0.234296	-0.00320326	0.471795	4.99414	1.98797	0.0530351	0.283918	-5.06651
ENSMUSG00000036402	Gng12	0.200043	0.0146303	0.385456	7.00167	2.17416	0.0350935	0.233643	-5.06773
ENSMUSG00000029007	Agtrap	0.282697	-0.0235803	0.588974	4.08532	1.86	0.0695524	0.328809	-5.06984
ENSMUSG00000054405	Dnajc8	0.172556	0.0135007	0.331611	7.32256	2.1862	0.0341438	0.23062	-5.07358
ENSMUSG00000033900	Map9	0.214073	0.0104041	0.417741	6.40726	2.11809	0.0398301	0.250154	-5.07455
ENSMUSG00000032172	Olfm2	0.311832	-0.0177397	0.641403	4.52099	1.91019	0.0630421	0.313213	-5.07477
ENSMUSG00000036850	Mrpl41	-0.244116	-0.478413	-0.00981942	6.15313	-2.10716	0.0415564	0.255575	-5.07535
ENSMUSG00000036054	Sugp2	0.323602	-0.0255304	0.672735	4.44217	1.87027	0.068396	0.326097	-5.07655
ENSMUSG00000087687	Pet100	-0.258656	-0.51827	0.000958224	5.2052	-2.008	0.0508151	0.278989	-5.07771
ENSMUSG00000017677	Wsb1	-0.362583	-0.780548	0.055383	3.51756	-1.74824	0.0873864	0.365263	-5.07877
ENSMUSG00000023977	Ubr2	0.205891	0.0069109	0.40487	5.99682	2.08514	0.0428683	0.26008	-5.07994
ENSMUSG00000042682	Selk	-0.157348	-0.300379	-0.0143171	7.99516	-2.21686	0.0318267	0.221683	-5.08025
ENSMUSG00000032564	Cpne4	-0.251295	-0.496927	-0.00566204	5.73295	-2.06624	0.0451774	0.267629	-5.08031
ENSMUSG00000032295	Man2c1	0.347312	-0.0615485	0.756173	3.17823	1.7118	0.0939484	0.378708	-5.08045
ENSMUSG00000032952	Ap4b1	0.294648	-0.0413251	0.630621	3.72161	1.76729	0.0840892	0.358944	-5.0827
ENSMUSG00000052560	Cpne8	0.268862	-0.0200921	0.557817	4.33894	1.87503	0.0674099	0.323836	-5.08392
ENSMUSG00000029344	Tpst2	0.245268	-0.0125402	0.503076	4.60262	1.91713	0.0617039	0.310108	-5.08418
ENSMUSG00000004936	Map2k1	-0.230237	-0.447135	-0.0133382	6.67888	-2.14783	0.0380686	0.245273	-5.08435
ENSMUSG00000038387	Rras	0.29079	-0.0178123	0.599392	4.39192	1.89884	0.0641303	0.31576	-5.08444
ENSMUSG00000026799	Med27	0.382018	-0.107881	0.871918	2.5989	1.57139	0.123229	0.429722	-5.08534
ENSMUSG00000033467	Crlf2	0.266439	0.00110371	0.531775	5.48061	2.02909	0.0490987	0.276323	-5.08618
ENSMUSG00000061306	Slc38a10	0.239057	-0.0140005	0.492114	4.56038	1.90366	0.0634826	0.313869	-5.08633
ENSMUSG00000039252	Lgi2	0.247012	-0.00451188	0.498535	5.11968	1.979	0.054071	0.287192	-5.08707
ENSMUSG00000021824	Ap3m1	0.260134	-0.0102183	0.530487	4.75901	1.93899	0.0589083	0.302549	-5.0884
ENSMUSG00000022848	Dirc2	-0.245886	-0.490695	-0.0010779	5.4308	-2.02402	0.0490423	0.276323	-5.08906
ENSMUSG00000031681	Smad1	0.257931	-0.0126624	0.528524	4.63196	1.92085	0.06122	0.308663	-5.08962
ENSMUSG00000038170	Pde4dip	0.183163	0.00999784	0.356327	6.61399	2.1315	0.0386492	0.247273	-5.09061
ENSMUSG00000043445	Pgp	-0.203005	-0.402634	-0.00337687	5.69076	-2.04924	0.0464072	0.270741	-5.0915
ENSMUSG00000002012	Pnck	0.211538	0.00165927	0.421417	5.53284	2.03108	0.0482919	0.27535	-5.09151
ENSMUSG00000052584	Serp2	-0.185464	-0.357592	-0.0133352	7.21931	-2.17127	0.0353249	0.234636	-5.09208
ENSMUSG00000043881	Kbtbd7	-0.338649	-0.716297	0.0389995	3.87253	-1.80844	0.0775358	0.347311	-5.09482
ENSMUSG00000045636	Mtus1	0.236821	-0.0102968	0.483939	4.80489	1.93119	0.0598935	0.305878	-5.09648
ENSMUSG00000031901	Dus2	0.332423	-0.0747561	0.739603	2.98452	1.64518	0.107032	0.401237	-5.09812
ENSMUSG00000030403	Vasp	0.363834	-0.0981869	0.825855	2.74632	1.5869	0.11967	0.424176	-5.09928
ENSMUSG00000026174	Rqcd1	0.377092	-0.0761562	0.830339	3.17717	1.67656	0.100694	0.390528	-5.09952
ENSMUSG00000094936	Rbm4	0.493608	-0.14771	1.13493	2.56717	1.55978	0.127368	0.437007	-5.09963
ENSMUSG00000036098	Myrf	-0.3871	-0.839024	0.0648236	3.41547	-1.73042	0.0911571	0.374369	-5.09997
ENSMUSG00000074406	Zfp628	0.296533	-0.0501624	0.643228	3.49838	1.72358	0.0917774	0.375668	-5.10247
ENSMUSG00000006763	Saal1	0.367177	-0.0958627	0.830217	2.76949	1.59796	0.117183	0.4203	-5.10285
ENSMUSG00000023328	Ache	0.355449	-0.0963559	0.807255	2.74489	1.58538	0.120014	0.424715	-5.10401
ENSMUSG00000037139	Myom3	0.301419	-0.0428238	0.645662	3.62354	1.76447	0.0845683	0.360035	-5.10402
ENSMUSG00000025745	Hadha	0.200298	0.00657658	0.394019	6.0877	2.08356	0.0430187	0.260193	-5.10414
ENSMUSG00000054942	Fam73a	0.217828	0.00292948	0.432727	5.67298	2.04262	0.0470865	0.272462	-5.10459
ENSMUSG00000025993	Slc40a1	-0.357565	-0.805942	0.0908125	2.73755	-1.60701	0.115178	0.416862	-5.10503
ENSMUSG00000008140	Emc10	0.163872	0.0119547	0.31579	7.39489	2.17373	0.0351281	0.233643	-5.1058
ENSMUSG00000023156	Rpp14	-0.200712	-0.398554	-0.00287051	5.72117	-2.04439	0.0469042	0.272193	-5.10608
ENSMUSG00000057147	Dph6	0.240317	-0.00285987	0.483493	5.20942	1.99145	0.0526378	0.283298	-5.10705
ENSMUSG00000041216	Clvs1	0.23817	-0.00949824	0.485839	4.85123	1.93787	0.0590486	0.302973	-5.1072
ENSMUSG00000023945	Slc5a7	0.695895	-0.279006	1.6708	2.17984	1.47485	0.153518	0.477785	-5.10731
ENSMUSG00000031442	Mcf2l	-0.182742	-0.354136	-0.0113474	6.93736	-2.14857	0.0371902	0.241345	-5.10762
ENSMUSG00000025470	Zfp511	0.341784	-0.0767531	0.760322	2.97245	1.6456	0.106944	0.401237	-5.10934
ENSMUSG00000024589	Nedd4l	0.17061	0.0102249	0.330994	6.90592	2.14362	0.0376079	0.243097	-5.11
ENSMUSG00000062110	Scfd2	0.317497	-0.0743056	0.709301	2.98289	1.63298	0.109584	0.407207	-5.11108
ENSMUSG00000060166	Zdhhc8	-0.265633	-0.54788	0.0166145	4.46328	-1.89653	0.0644423	0.315961	-5.1118
ENSMUSG00000062646	Ganc	0.293717	-0.0335815	0.621015	3.97746	1.80839	0.0773568	0.346981	-5.11208
ENSMUSG00000025630	Hprt	-0.199113	-0.386892	-0.0113342	6.83406	-2.13678	0.0381921	0.245588	-5.11399
ENSMUSG00000033769	Exoc6b	0.225975	-0.00235963	0.454311	5.27538	1.99433	0.0523116	0.282987	-5.11471
ENSMUSG00000050272	Dscam	-0.268773	-0.548329	0.0107835	4.7753	-1.93742	0.059105	0.302975	-5.11481
ENSMUSG00000066979	Bub3	0.222041	0.00437967	0.439702	5.82629	2.0557	0.0457522	0.26892	-5.11516
ENSMUSG00000035726	Supt16	0.205867	0.00104174	0.410691	5.59602	2.0254	0.0488952	0.276283	-5.11738
ENSMUSG00000040681	Hmgn1	0.184276	0.00881821	0.359733	6.55276	2.11643	0.0399788	0.250154	-5.1177
ENSMUSG00000023348	Trip6	0.367014	-0.0976983	0.831726	2.80098	1.5915	0.11863	0.42301	-5.11869
ENSMUSG00000079316	Rab9	-0.251991	-0.509177	0.00519542	5.06521	-1.97444	0.0546044	0.288777	-5.11889
ENSMUSG00000051890	Klhdc1	-0.34506	-0.7387	0.0485786	3.5974	-1.76748	0.0841977	0.359231	-5.11945
ENSMUSG00000031711	Zfp330	0.323283	-0.0521011	0.698667	3.6411	1.73546	0.0896325	0.37048	-5.11961
ENSMUSG00000024019	Cmtr1	0.261538	-0.020311	0.543387	4.43872	1.86993	0.0681304	0.326055	-5.11962
ENSMUSG00000000223	Drp2	-0.231937	-0.468088	0.00421347	5.24666	-1.9792	0.0540485	0.287192	-5.12006
ENSMUSG00000031883	Car7	0.39038	-0.10483	0.88559	2.81071	1.58857	0.119292	0.42383	-5.12053
ENSMUSG00000101523	RP23-363M8.1	0.31981	-0.063445	0.703065	3.36363	1.68156	0.0997134	0.389133	-5.12284
ENSMUSG00000008730	Hipk1	0.172138	0.0118418	0.332435	7.37405	2.16402	0.0359115	0.23679	-5.12595
ENSMUSG00000042178	Armc5	0.253762	-0.0299474	0.537471	4.02883	1.80244	0.0783029	0.348445	-5.13214
ENSMUSG00000020180	Snrpd3	0.218408	0.00990168	0.426914	6.77607	2.11447	0.0405059	0.251779	-5.13321
ENSMUSG00000037563	Rps16	-0.245906	-0.470683	-0.0211278	8.89266	-2.25195	0.0332602	0.226867	-5.13498
ENSMUSG00000056856	Jakmip3	-0.389934	-0.870397	0.0905278	3.01198	-1.6357	0.109047	0.406436	-5.13522
ENSMUSG00000027605	Acss2	-0.263704	-0.53708	0.00967203	4.99209	-1.94386	0.0583006	0.300854	-5.13532
ENSMUSG00000006527	Sfmbt1	0.224109	-0.0110702	0.459287	4.81323	1.9203	0.0612923	0.308869	-5.13617
ENSMUSG00000002107	Celf2	0.139326	0.0148754	0.263776	9.70667	2.25602	0.0290712	0.21144	-5.13645
ENSMUSG00000055799	Tcf7l1	0.296529	-0.0433453	0.636403	3.72656	1.75815	0.0856499	0.36225	-5.13651
ENSMUSG00000115987	Vps28	0.170341	0.00906555	0.331616	6.96723	2.12843	0.0389171	0.24767	-5.13843
ENSMUSG00000026923	Notch1	0.312278	-0.0406742	0.66523	3.91208	1.78293	0.081472	0.354321	-5.13874
ENSMUSG00000082229	Nap1l2	-0.248159	-0.500864	0.0045458	5.28726	-1.9789	0.0540829	0.287192	-5.14022
ENSMUSG00000025892	Gria4	-0.225873	-0.454243	0.00249721	5.47467	-1.99312	0.0524488	0.283191	-5.14175
ENSMUSG00000031447	Lamp1	0.146691	0.0114887	0.281894	8.01438	2.18639	0.0341292	0.23062	-5.14264
ENSMUSG00000038055	Dexi	0.25071	-0.0112184	0.512639	4.93696	1.92884	0.060192	0.306136	-5.14275
ENSMUSG00000034898	Filip1	0.448988	-0.0982895	0.996266	3.32814	1.67034	0.104493	0.397826	-5.14341
ENSMUSG00000023345	Poc1a	0.289202	-0.0433344	0.621738	3.80654	1.75255	0.0866196	0.364215	-5.1438
ENSMUSG00000003032	Klf4	0.324613	-0.0490874	0.698313	3.82666	1.75045	0.0869846	0.364262	-5.14382
ENSMUSG00000073102	Drc1	0.377388	-0.121224	0.876	2.50983	1.52522	0.134333	0.449766	-5.14386
ENSMUSG00000034636	Zyg11b	0.177386	0.0101544	0.344618	7.0702	2.13751	0.0381295	0.245505	-5.14388
ENSMUSG00000004393	Ddx56	0.307086	-0.0464624	0.660634	3.80688	1.75033	0.0870065	0.364262	-5.14501
ENSMUSG00000074637	Sox2	0.193044	0.00758879	0.378499	6.52013	2.09761	0.0416955	0.255952	-5.14658
ENSMUSG00000038534	Osbpl7	0.276193	-0.0404224	0.592808	3.85417	1.75788	0.0856975	0.36225	-5.14672
ENSMUSG00000032407	U2surp	0.193509	0.00462812	0.382391	6.19641	2.06453	0.0448701	0.266817	-5.14697
ENSMUSG00000025159	Mms19	0.302301	-0.0414397	0.646042	3.90585	1.77221	0.0832569	0.358099	-5.14759
ENSMUSG00000021250	Fos	0.50636	-0.207049	1.21977	2.10283	1.43557	0.159083	0.484969	-5.14918
ENSMUSG00000006392	Med8	0.257652	-0.0238796	0.539183	4.40356	1.84423	0.0718642	0.334182	-5.15014
ENSMUSG00000029345	Tfip11	0.355897	-0.0843801	0.796174	3.15127	1.62894	0.110438	0.408538	-5.1505
ENSMUSG00000031928	Mre11a	0.403102	-0.112489	0.918693	2.84783	1.5755	0.122279	0.428559	-5.15102
ENSMUSG00000035212	Leprot	0.349445	-0.0850975	0.783988	2.99148	1.62052	0.112239	0.412034	-5.15117
ENSMUSG00000061360	Phf5a	0.267772	0.000495061	0.53505	5.85614	2.03347	0.0495997	0.277561	-5.1512
ENSMUSG00000031826	Usp10	0.308729	-0.038973	0.656431	4.01841	1.78928	0.0804286	0.352519	-5.15276
ENSMUSG00000032698	Lmo2	0.295901	-0.0421944	0.633995	3.7579	1.76366	0.0847059	0.360135	-5.1529
ENSMUSG00000036905	C1qb	0.269533	-0.00616804	0.545233	5.39389	1.97628	0.0550952	0.290382	-5.15293
ENSMUSG00000018449	Rpain	-0.350086	-0.769276	0.0691042	3.41211	-1.68295	0.0994417	0.38883	-5.15371
ENSMUSG00000026121	Sema4c	0.395008	-0.136958	0.926974	2.495	1.49634	0.141677	0.458234	-5.15382
ENSMUSG00000021945	Zmym2	0.223025	0.000179922	0.44587	5.7227	2.01678	0.0498232	0.278025	-5.15428
ENSMUSG00000021067	Sav1	-0.359935	-0.790096	0.0702255	3.41823	-1.68627	0.0988112	0.388073	-5.15459
ENSMUSG00000012296	Tjap1	-0.334416	-0.75669	0.0878575	2.99422	-1.59588	0.117646	0.421323	-5.15558
ENSMUSG00000068039	Tcp1	0.156881	0.00838727	0.305375	7.03268	2.12897	0.0388694	0.247655	-5.15591
ENSMUSG00000024687	Osbp	0.318751	-0.0537141	0.691216	3.62746	1.72454	0.0916031	0.375109	-5.16038
ENSMUSG00000031839	Hsbp1	-0.150093	-0.288681	-0.0115047	8.13532	-2.18244	0.0344381	0.231035	-5.16061
ENSMUSG00000032968	Inha	0.362508	-0.0972083	0.822223	2.81565	1.58904	0.119185	0.423705	-5.16202
ENSMUSG00000001023	S100a5	-2.2413	-5.44386	0.961256	2.23647	-1.47461	0.158285	0.483732	-5.1625
ENSMUSG00000075706	Gpx4	-0.322294	-0.645069	0.000480387	5.89341	-2.0574	0.0503163	0.278606	-5.16255
[truncated: 7,881 more rows]
